# Supplementary material for: Oxidized Resveratrol Metabolites as Potent Antioxidants and Xanthine Oxidase Inhibitors
Source: MDPI journal article supplement (doi:10.3390/antiox11091832), 2022-09-17
Supplement: s1 [file s1]

# Supplementary Materials to Oxidized resveratrol metabolites as potent antioxidants and xanthine oxidase inhibitors

Orinamhe G. Agbadua<sup>1</sup>, Norbert Kúsz<sup>1</sup>, Róbert Berkecz<sup>2</sup>, Tamás Gáti<sup>3</sup>, Gábor Tóth<sup>4</sup>, and Attila Hunyadi<sup>1,5,\*</sup>

<sup>1</sup> Institute of Pharmacognosy, University of Szeged, H-6720, Szeged, Hungary

<sup>2</sup> Institute of Pharmaceutical Analysis, University of Szeged, H-6720 Szeged, Hungary

<sup>3</sup> Servier Research Institute of Medicinal Chemistry (SRIMC), H-1031 Budapest, Hungary

<sup>4</sup> NMR Group, Department of Inorganic and Analytical Chemistry, Budapest University of Technology and Economics, H-1111 Budapest, Hungary

<sup>5</sup> Interdisciplinary Centre of Natural Products, University of Szeged, H-6720 Szeged, Hungary

\* Correspondence: hunyadi.attila@szte.hu; Tel.: +36-62546456

## Table of contents

**Figure S1.** HPLC-PDA fingerprint of oxidized product mixture Ox1.

**Figure S2.** HPLC-PDA fingerprint of oxidized product mixture Ox2.

**Figure S3.** HPLC-PDA fingerprint of oxidized product mixture Ox3.

**Figure S4.** HPLC-PDA fingerprint of oxidized product mixture Ox4.

**Figure S5.** HPLC-PDA fingerprint of oxidized product mixture Ox5.

**Figure S6.** HPLC-PDA fingerprint of oxidized product mixture Ox6.

**Figure S7.** HPLC-PDA fingerprint of oxidized product mixture Ox7.

**Figure S8.** Compound **2**, HRMS (positive mode).

**Figure S9.** Compound **2**, HRMS (negative mode).

**Figure S10.** Compound **3**, HRMS (negative mode).

**Figure S11.** Compound **4**, HRMS (positive mode).

**Figure S12.** Compound **5**, HRMS (positive mode).

**Figure S13.** Compound **6**, HRMS (positive mode).

**Figure S14.** Compound **7**, HRMS (negative mode).

**Figure S15.** Compound **8**, HRMS (positive mode).

**Figure S16.** Compound **2**, <sup>1</sup>H NMR spectrum.

**Figure S17.** Compound **2**, <sup>13</sup>C, APT NMR spectrum.

**Figure S18.** Compound **2**, HSQC and HMBC spectra.

**Figure S19.** Compound **2**, COSY and NOESY spectra.

**Figure S20.** Compound **3**,  $^1\text{H}$  NMR spectrum.

**Figure S21.** Compound **3**,  $^{13}\text{C}$ , APT NMR spectrum.

**Figure S22.** Compound **3**, HSQC and HMBC spectra.

**Figure S23.** Compound **3**, COSY spectrum.

**Figure S24.** Compound **4**,  $^1\text{H}$  NMR spectrum.

**Figure S25.** Compound **4**,  $^{13}\text{C}$ , APT NMR spectrum.

**Figure S26.** Compound **4**, HSQC and HMBC spectra.

**Figure S27.** Compound **4**, COSY spectrum.

**Figure S28.** Compound **5**,  $^1\text{H}$  NMR spectrum, and selROE on  $\delta$ 4.47 and  $\delta$ 5.45 ppm.

**Figure S29.** Compound **5**,  $^{13}\text{C}$ , APT NMR spectrum.

**Figure S30.** Compound **5**, HSQC spectrum and HSQC section.

**Figure S31.** Compound **5**, COSY spectrum.

**Figure S32.** Compound **5**, HMBC spectrum.

**Figure S33.** Compound **6**,  $^1\text{H}$  spectrum, and selNOE on  $\delta$ 4.48 and  $\delta$ 5.42 ppm.

**Figure S34.** Compound **6**,  $^{13}\text{C}$ , APT NMR spectrum.

**Figure S35.** Compound **6**, HSQC spectrum.

**Figure S36.** Compound **6**, HMBC spectrum.

**Figure S37.** Compound **6**, COSY and NOESY spectra.

**Figure S38.** Compound **7**,  $^1\text{H}$  NMR spectrum.

**Figure S39.** Compound **7**,  $^{13}\text{C}$ , APT NMR spectrum.

**Figure S40.** Compound **7**, NOESY spectrum and NOESY section.

**Figure S41.** Compound **7**, HSQC and HMBC spectra.

**Figure S42.** Compound **7**, COSY spectrum.

**Figure S43.** Compound **8**,  $^1\text{H}$  NMR spectrum.

**Figure S44.** Compound **8**,  $^{13}\text{C}$ , APT NMR spectrum.

**Figure S45.** Compound **8**, HSQC spectrum and HSQC section.

**Figure S46.** Compound **8**, HMBC spectrum and HMBC section.

**Figure S47.** Compound **8**, COSY spectrum and COSY aromatic section.

**Figure S48.** Compound **8**, NOESY; arrows indicate steric proximities, and assign configuration and the dominant conformer.

**Figure S49.** Compound **9**,  $^1\text{H}$  NMR spectrum.

**Figure S50.** Compound **9**,  $^{13}\text{C}$ , APT NMR spectrum.

**Figure S51.** Compound **9**, HSQC spectrum and HSQC section.

**Figure S52.** Compound **9**, HMBC spectrum.

**Figure S53.** Compound **9**, NOESY spectrum.

**Figure S54.** Compound **9**, HSQC spectrum and HSQC section,  $\text{DMSO-d}_6$ ,  $T=80^\circ\text{C}$ .

**Figure S55.** Compound **9**,  $^{13}\text{C}$ , APT NMR spectrum,  $\text{DMSO-d}_6$ ,  $T=80^\circ\text{C}$ .

**Figure S56.** Compound **9**, selROE on CH (5.15 ppm) and OH (4.54 ppm) ,  $\text{DMSO-d}_6$ ,  $T=80^\circ\text{C}$ .

**Figure S57.** Lineweaver-Burk plot of compound **2**.

**Figure S58.** Lineweaver-Burk plot of compound **3**.

**Figure S59.** Lineweaver-Burk plot of compound **4**.

**Figure S60.** Lineweaver-Burk plot of compound **5**.

**Figure S61.** Lineweaver-Burk plot of compound **6**.

**Figure S1.** HPLC-PDA fingerprint of oxidized product mixture Ox1.

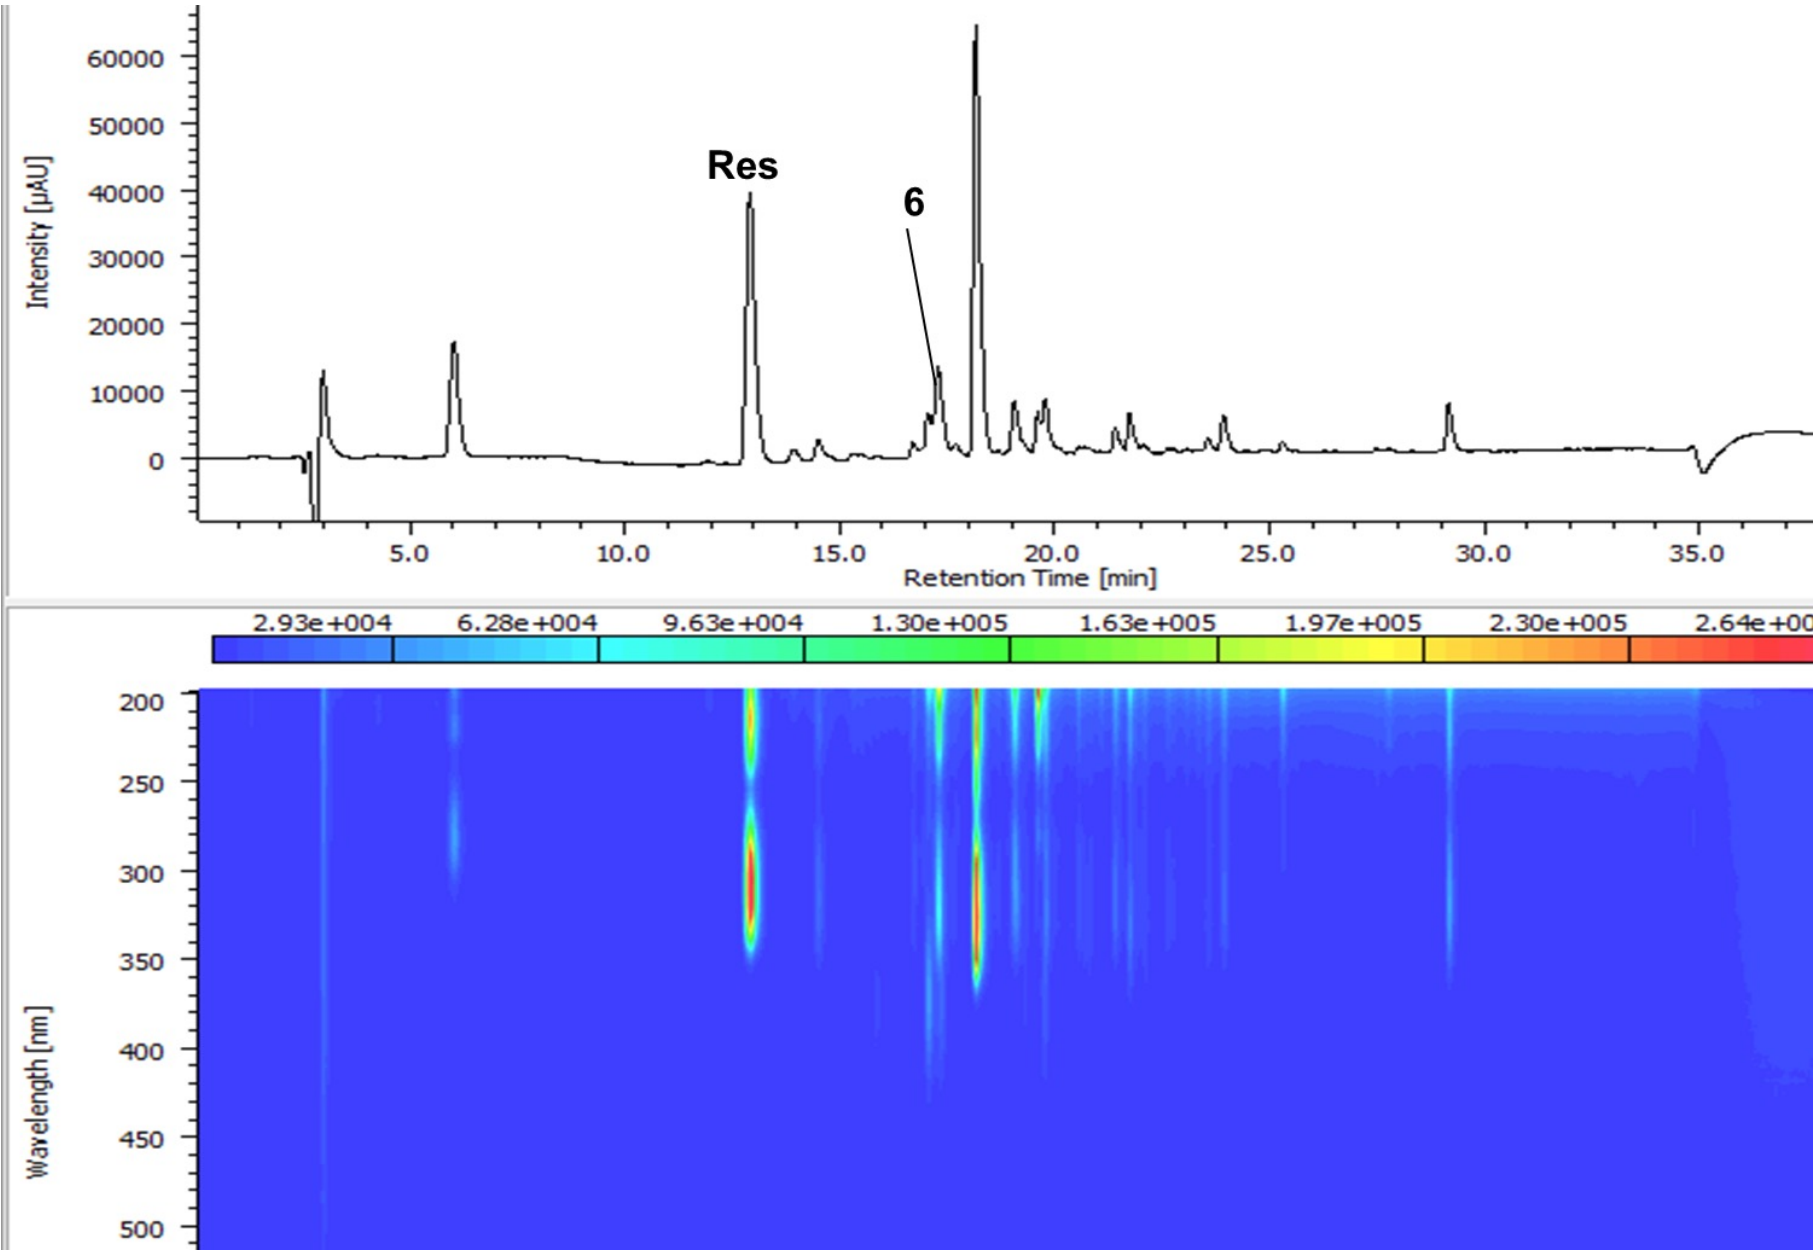

**Figure S2.** HPLC-PDA fingerprint of oxidized product mixture Ox2.

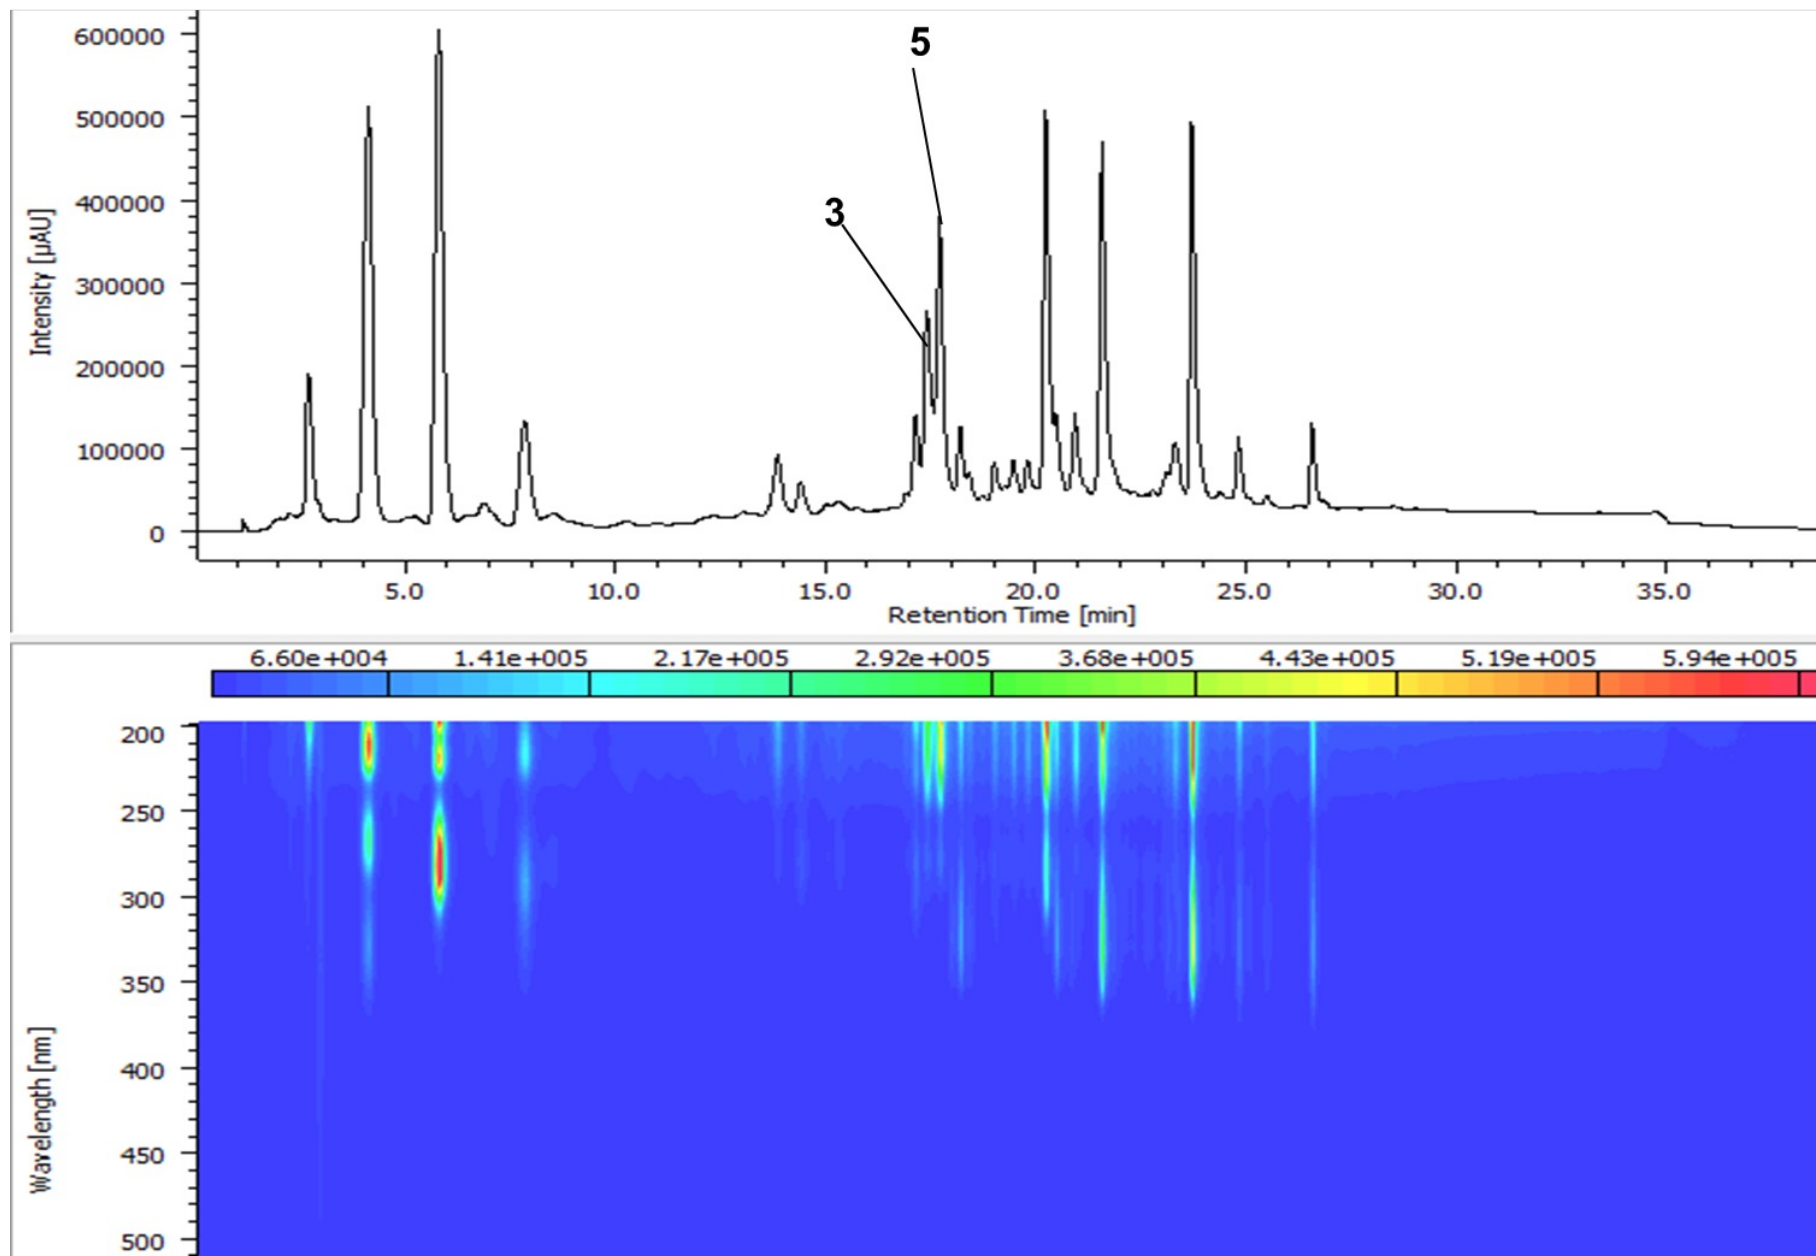

**Figure S3.** HPLC-PDA fingerprint of oxidized product mixture Ox3.

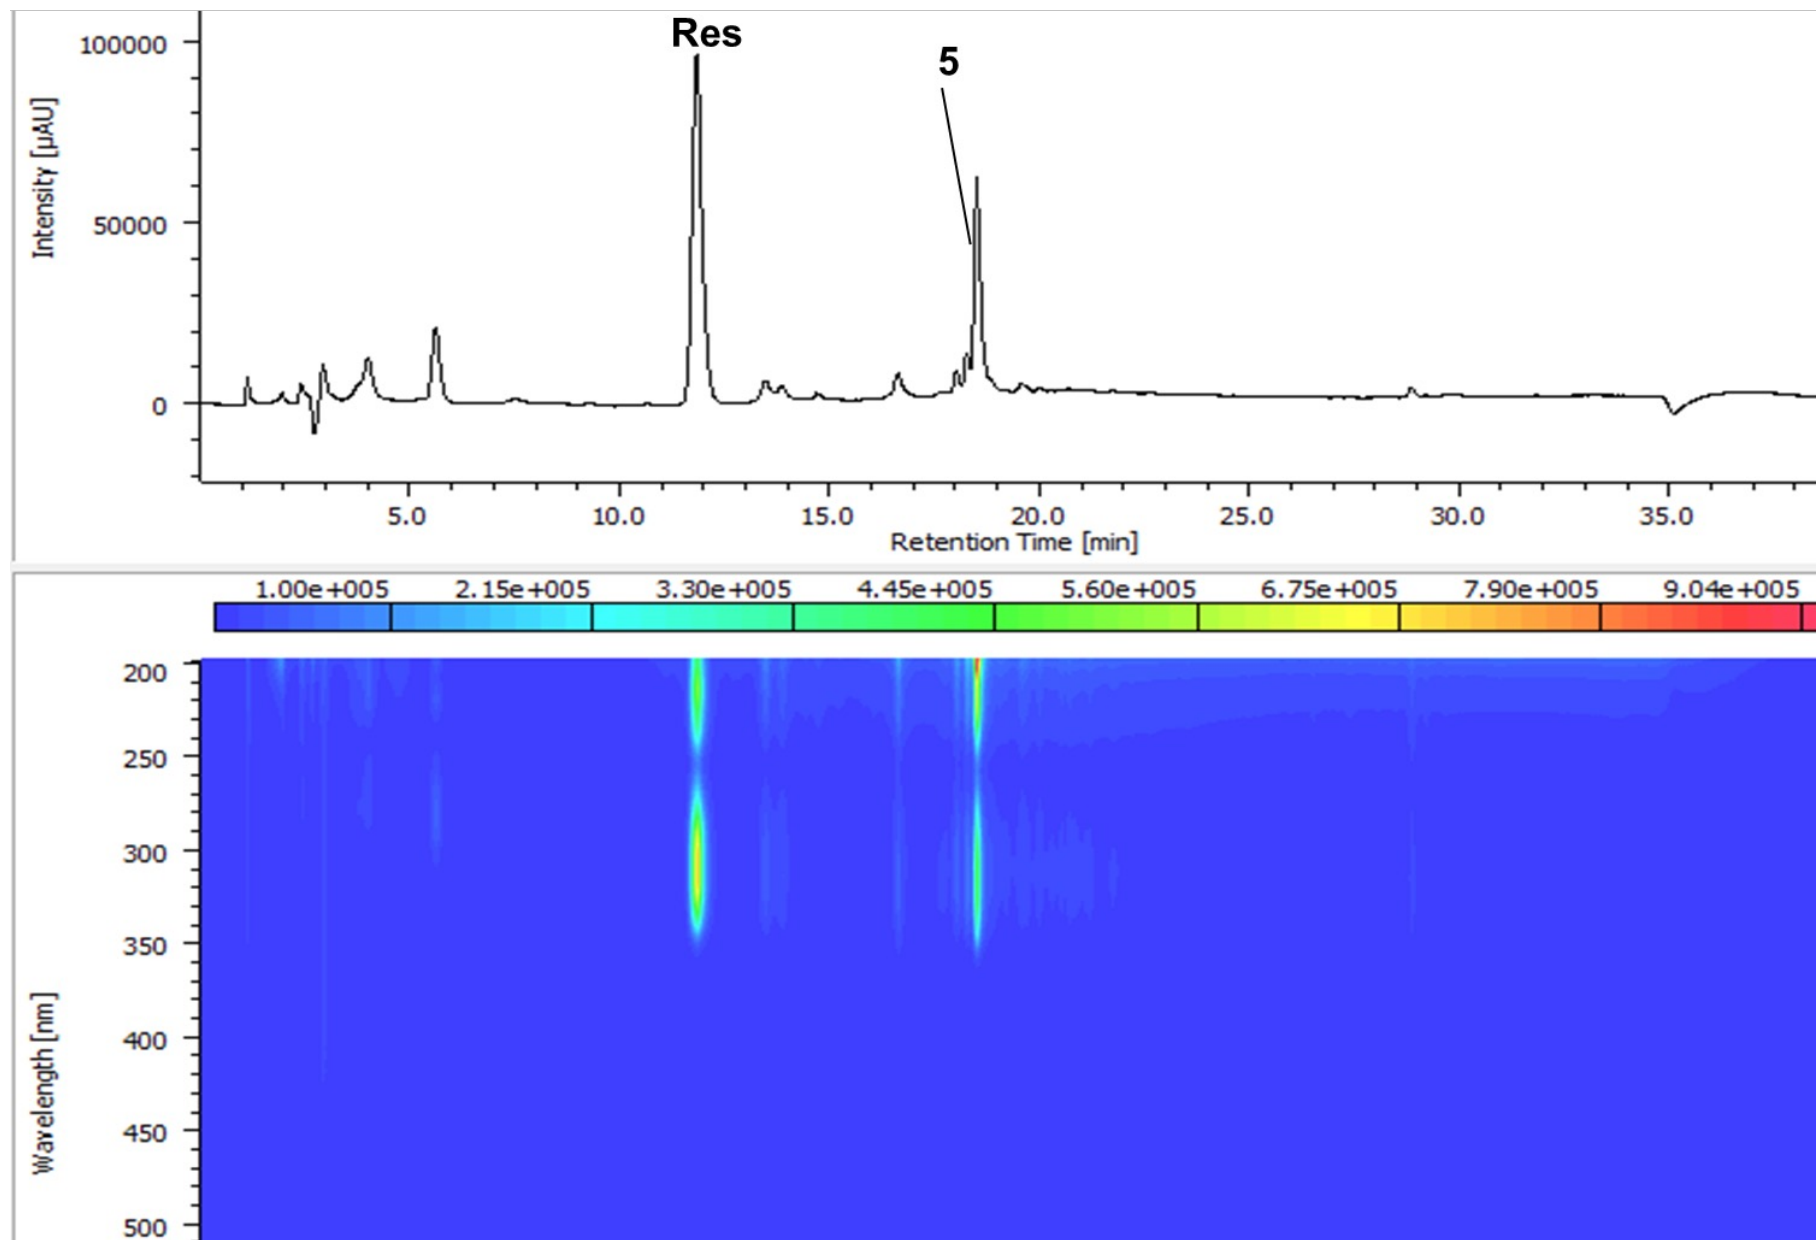

**Figure S4.** HPLC-PDA fingerprint of oxidized product mixture Ox4.

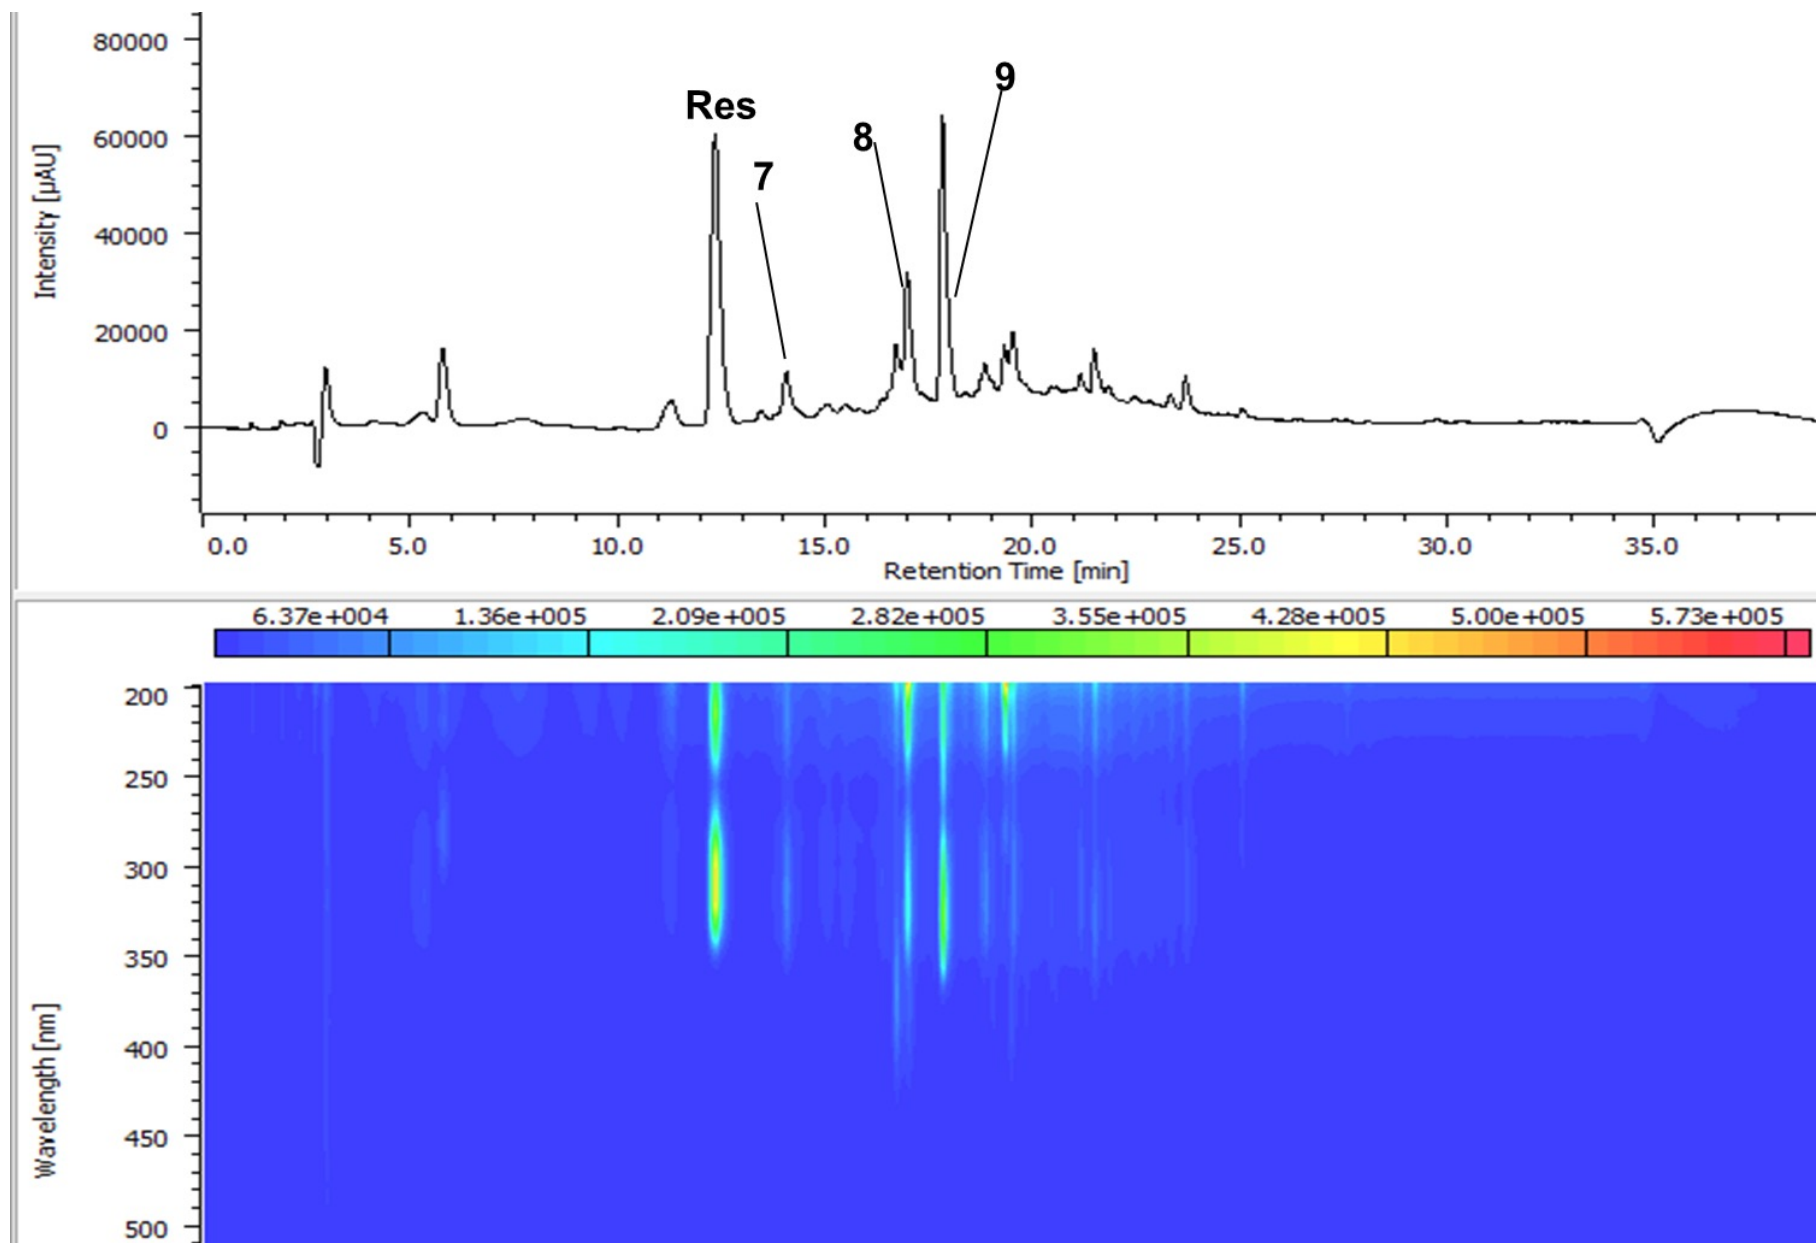

**Figure S5.** HPLC-PDA fingerprint of oxidized product mixture Ox5.

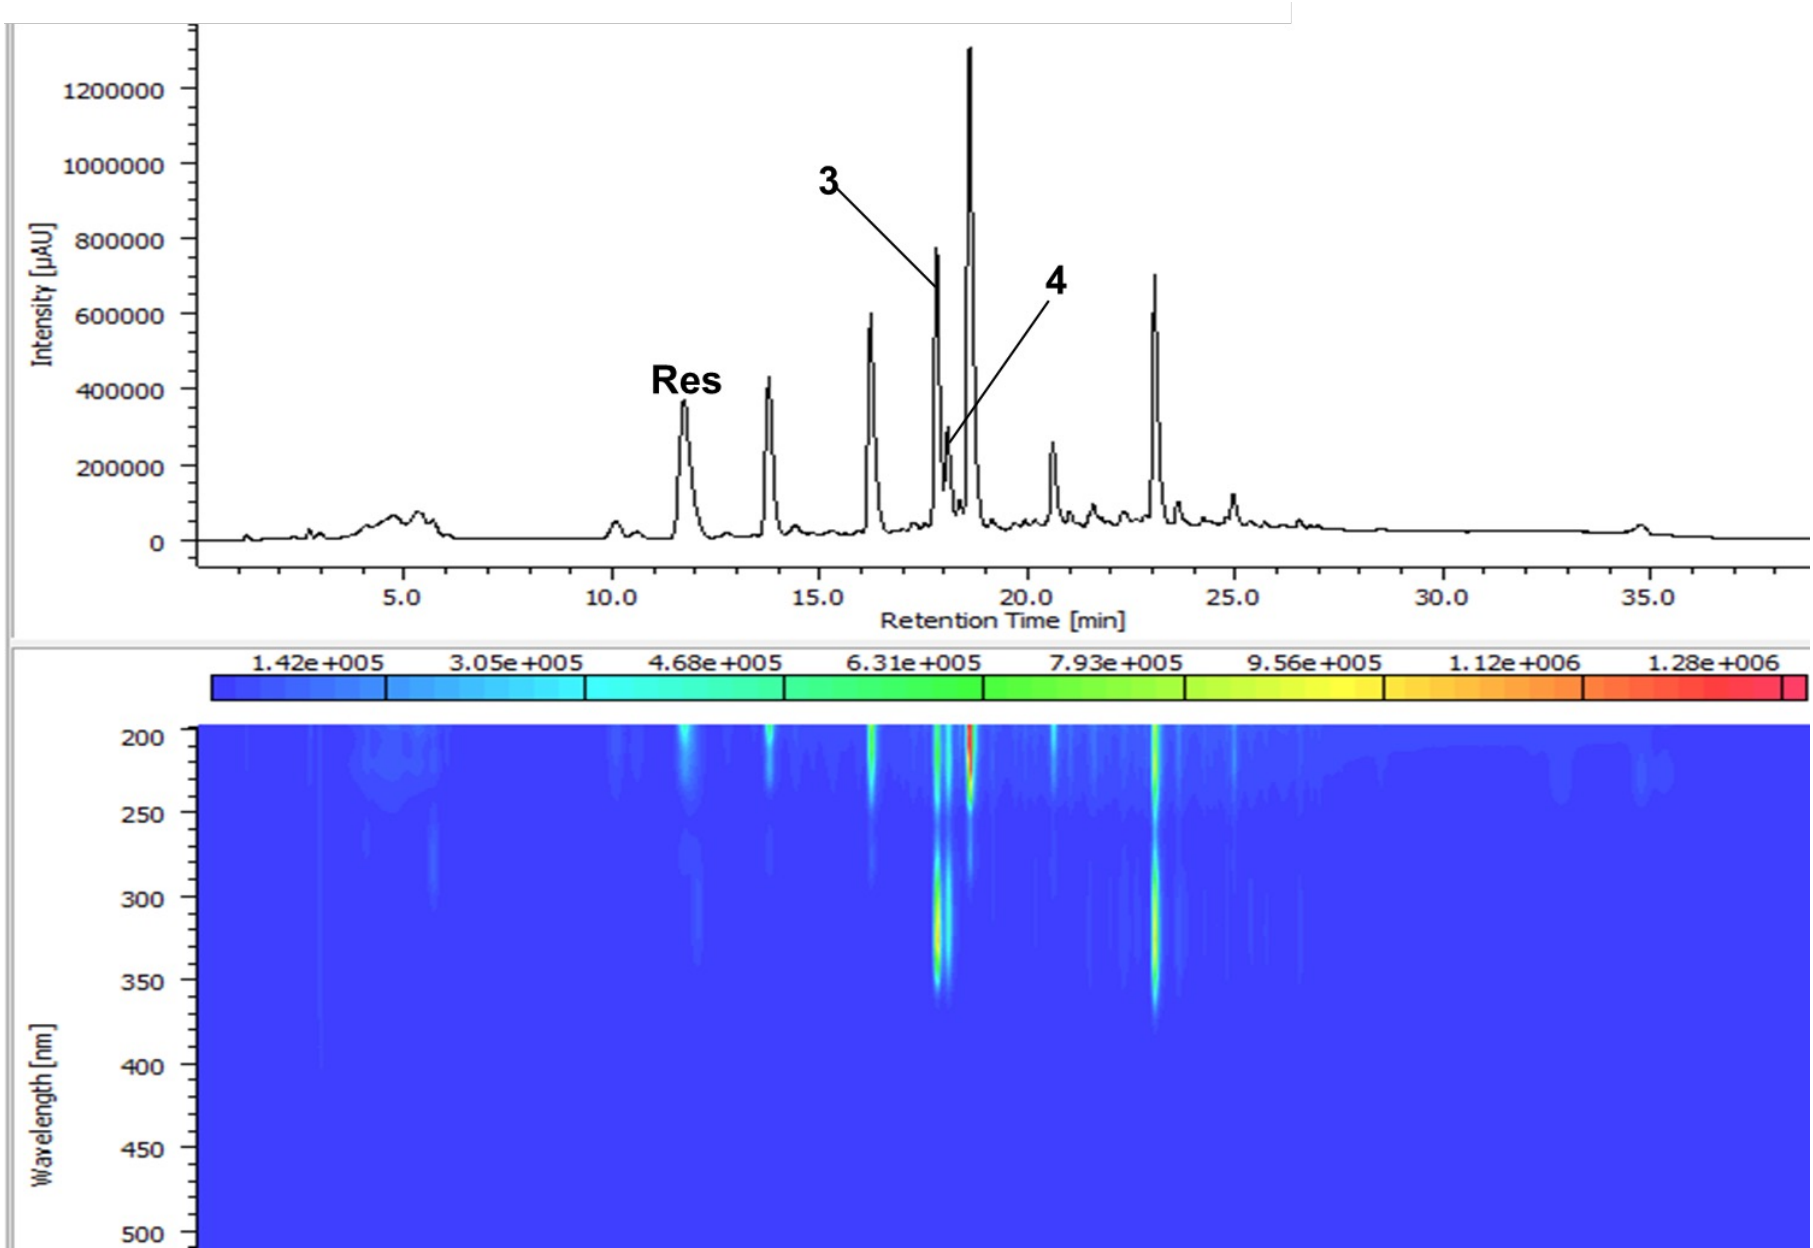



**Figure S6.** HPLC-PDA fingerprint of oxidized product mixture Ox6.

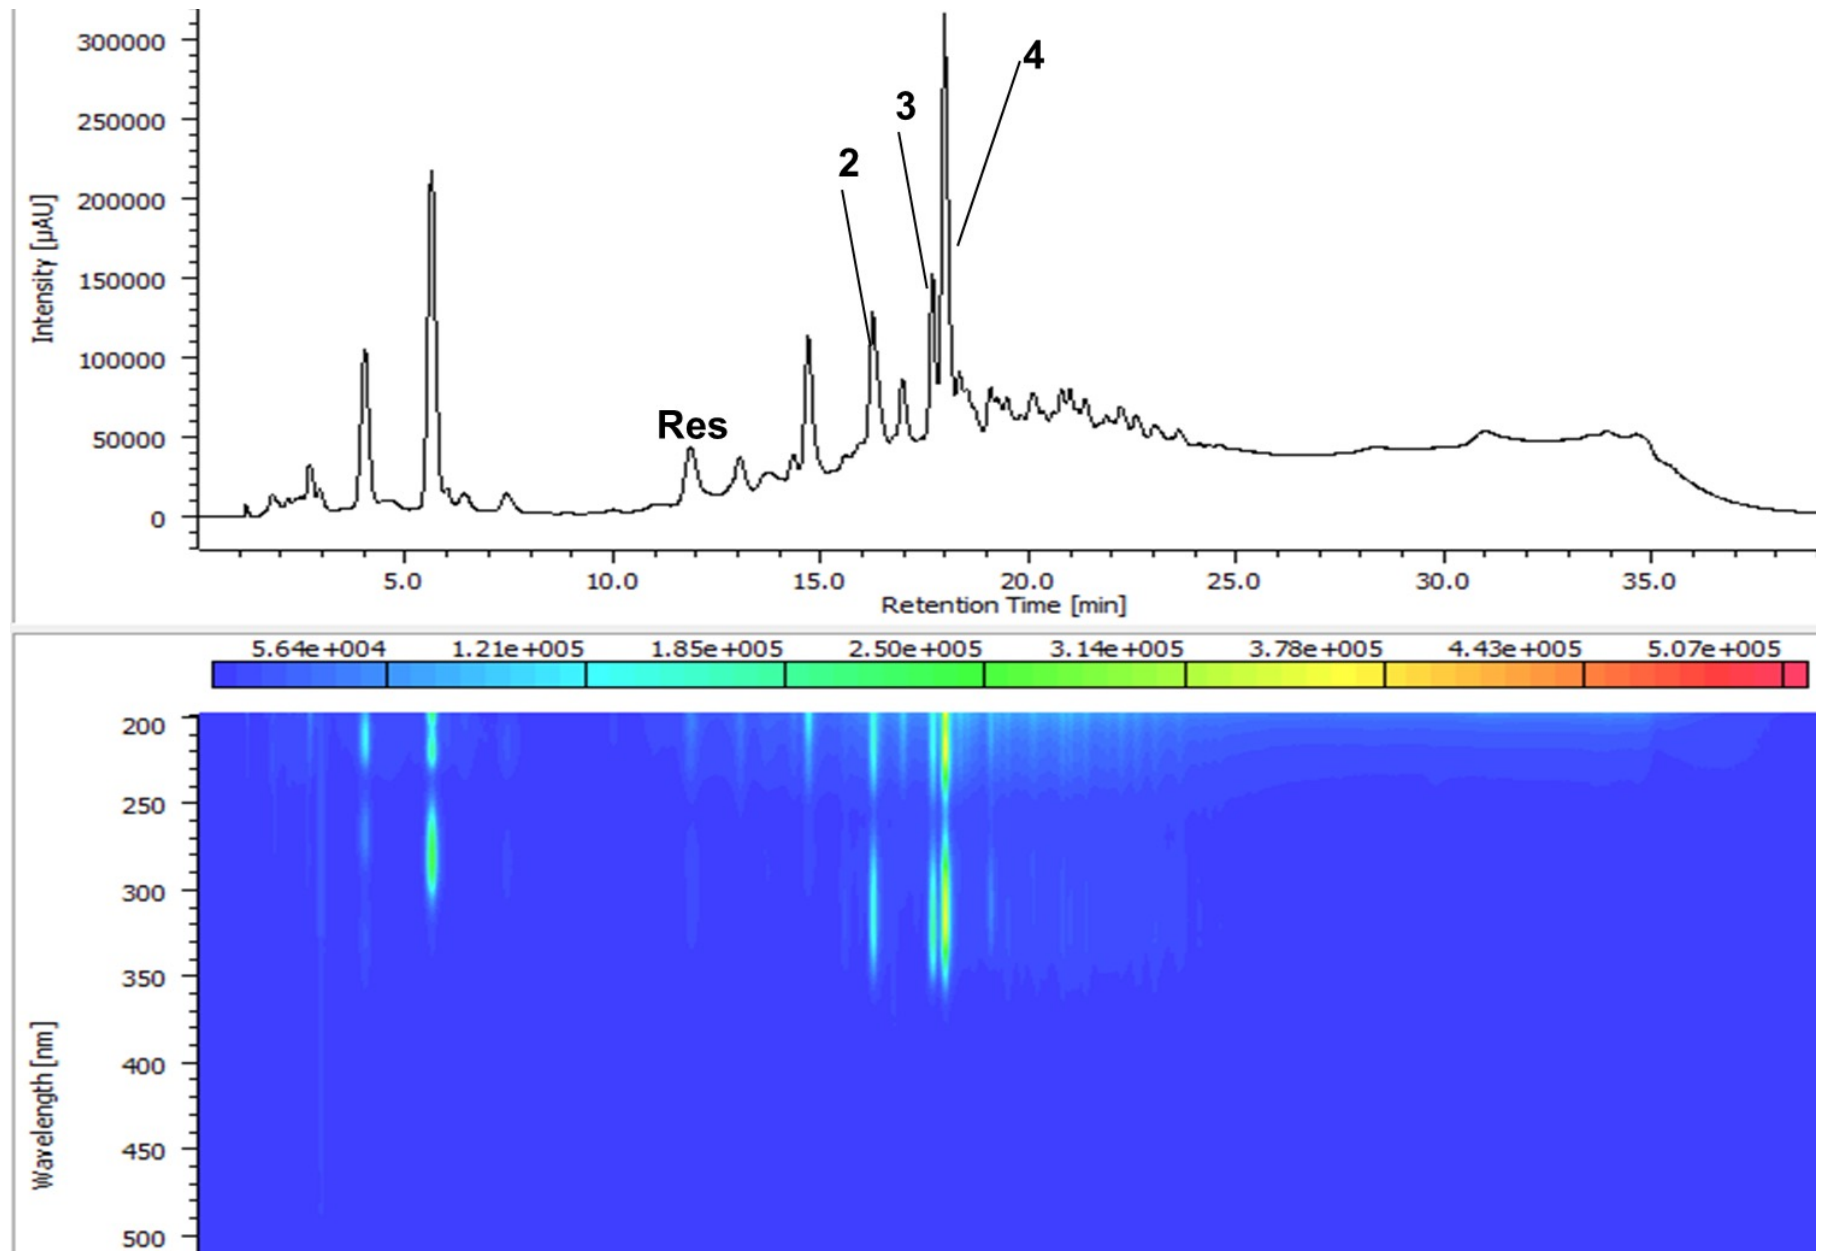

**Figure S7.** HPLC-PDA fingerprint of oxidized product mixture Ox7.

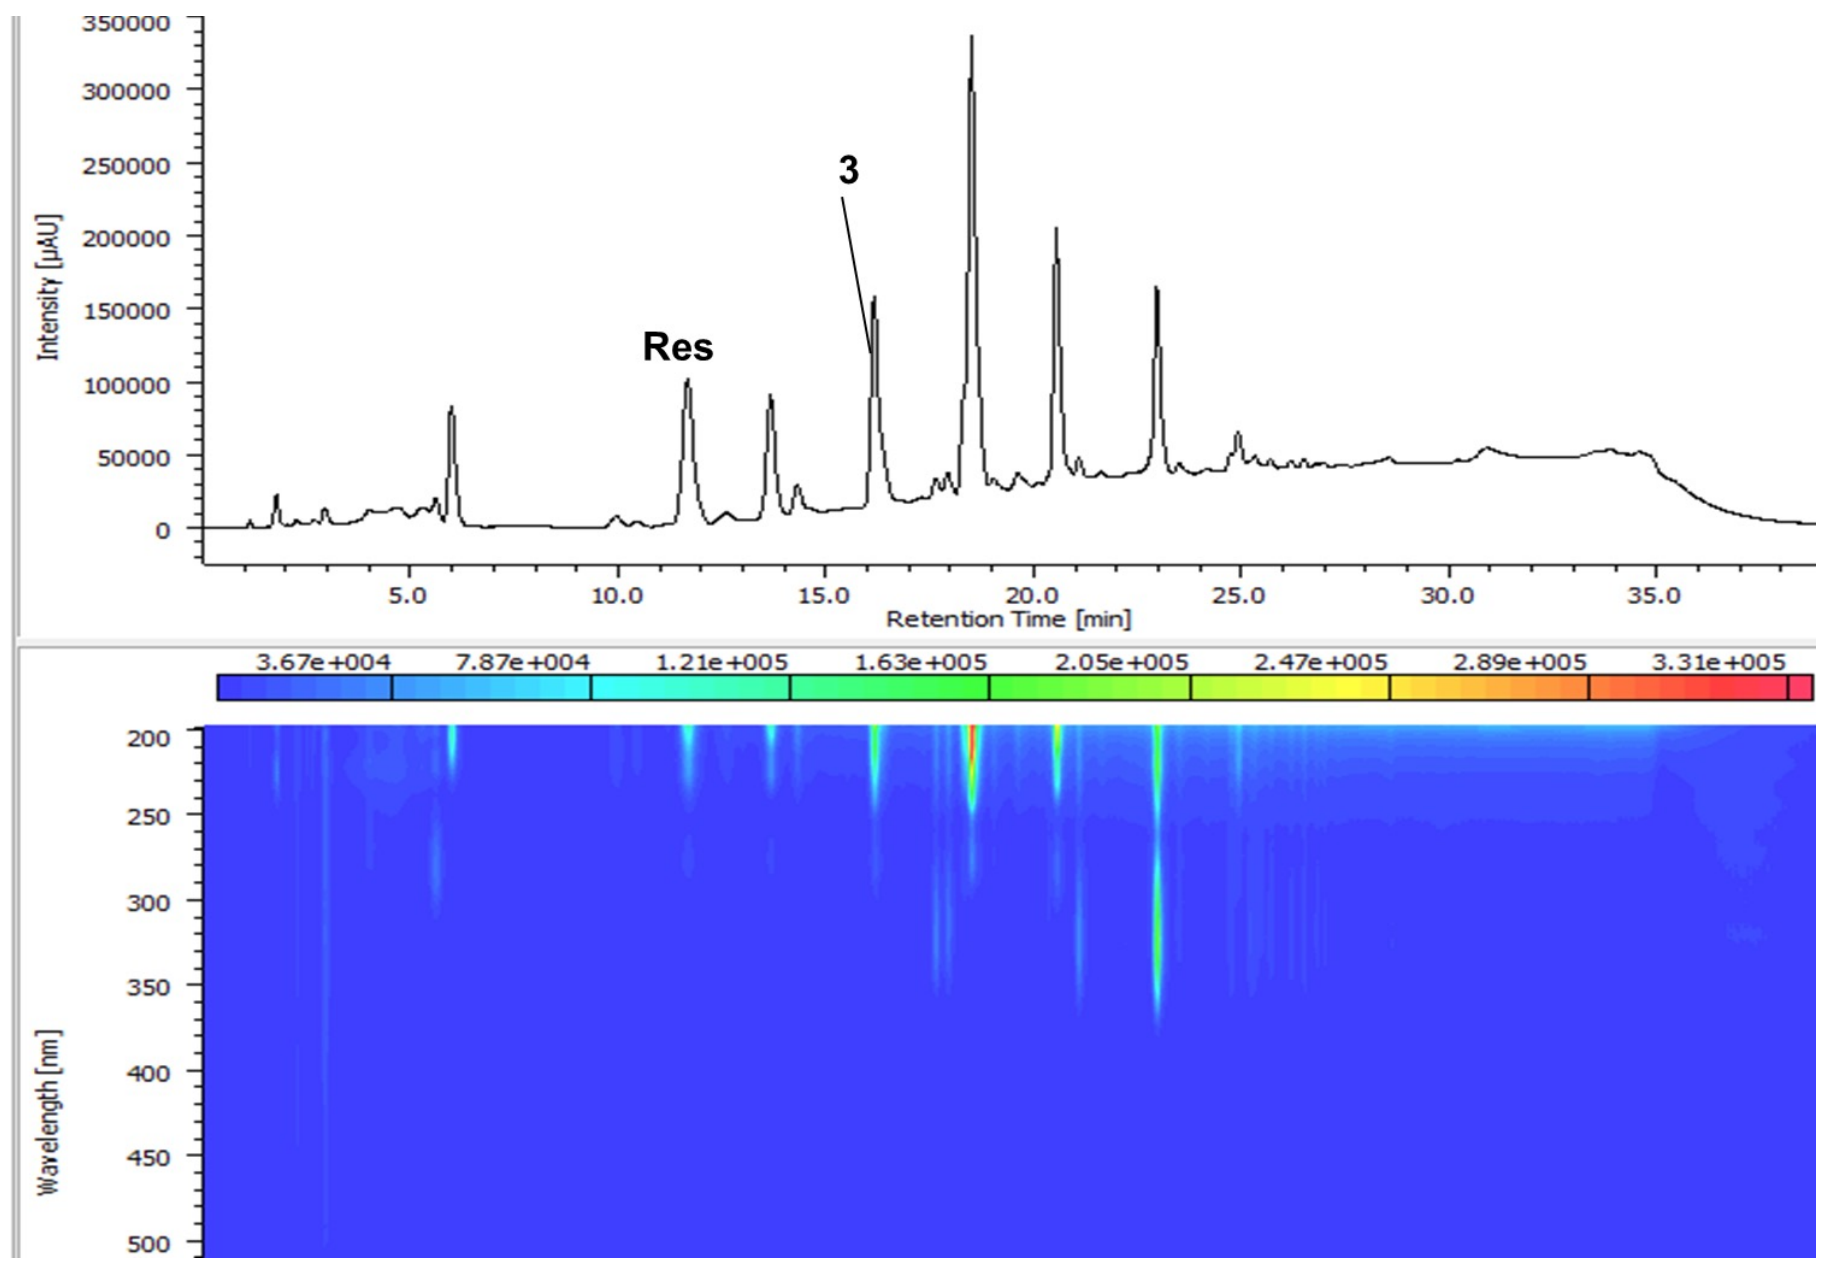

**Figure S8.** Compound **2**, HRMS (positive mode).

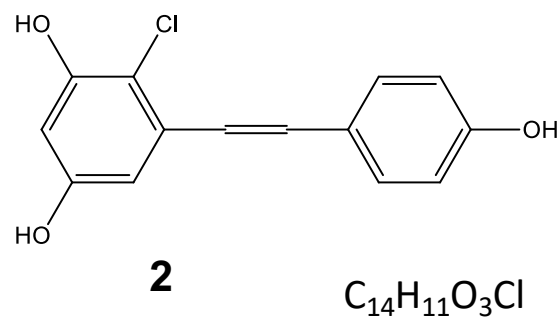

vm-20211012-pos-3 #2621-2637 RT: 14.00-14.08 AV: 17 NL: 6.21E7  
T: FTMS + p ESI Full ms [125.0000-1000.0000]

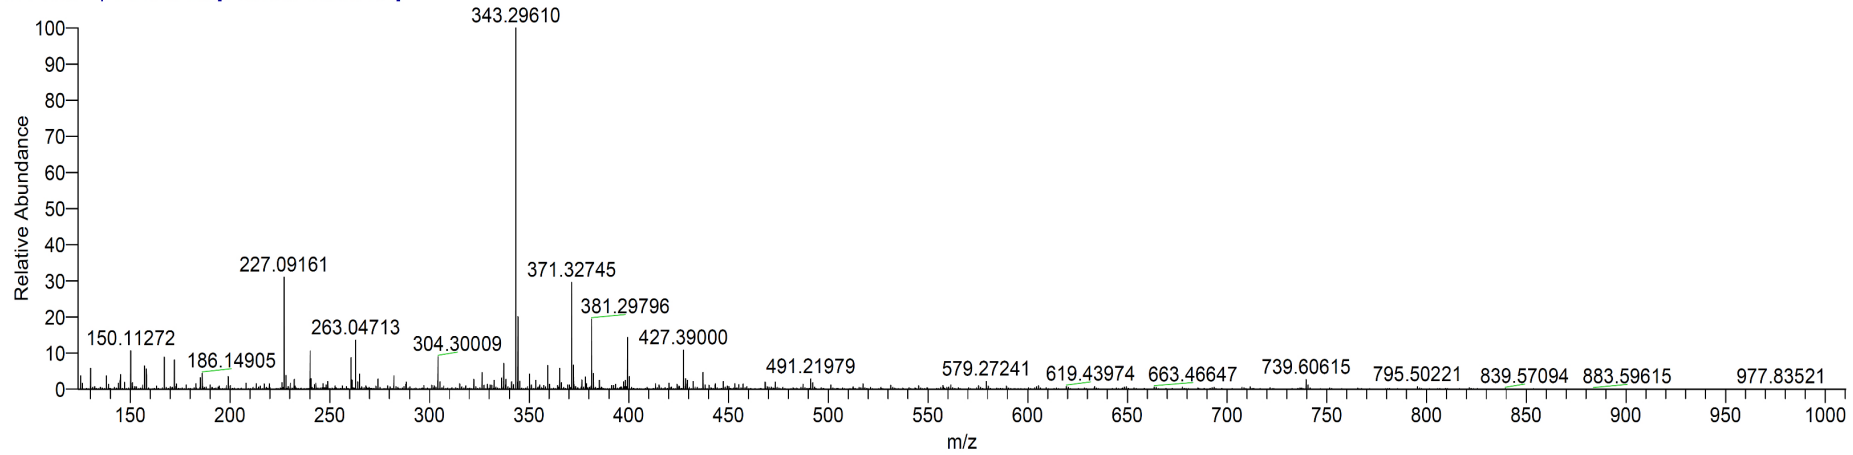

vm-20211012-pos-3 #2621-2637 RT: 14.00-14.08 AV: 17 NL: 8.42E6  
T: FTMS + p ESI Full ms [125.0000-1000.0000]

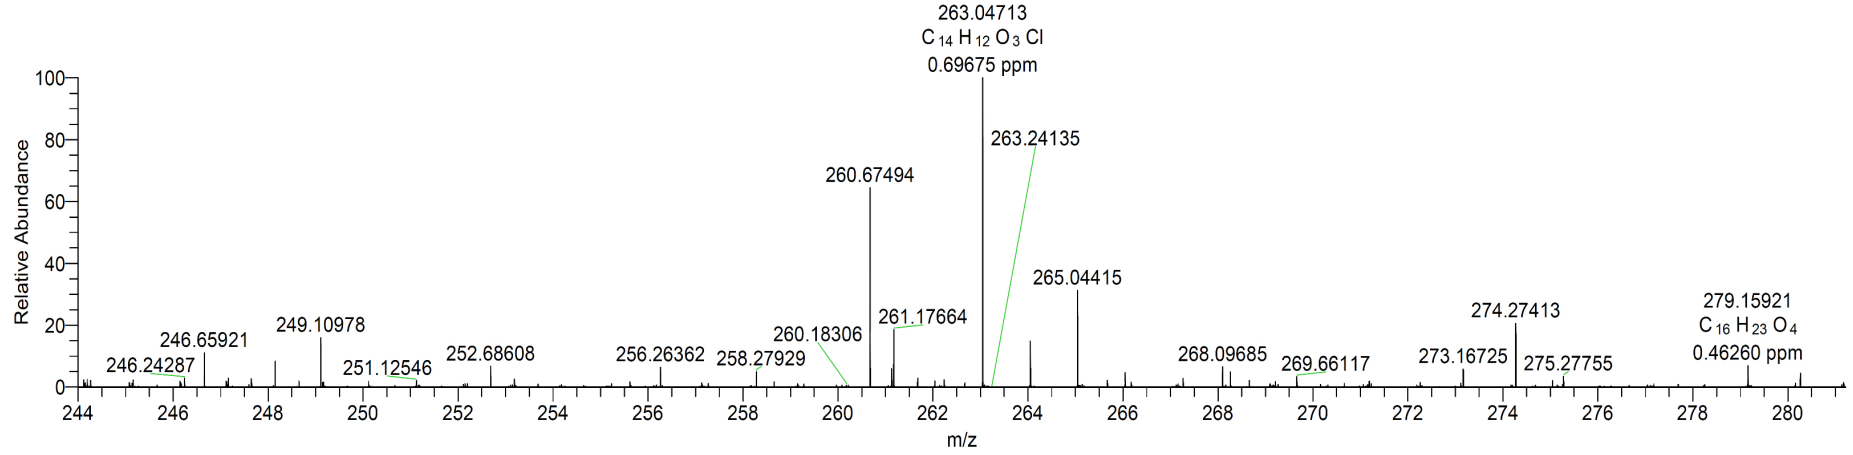

**Figure S9.** Compound **2**, HRMS (negative mode).

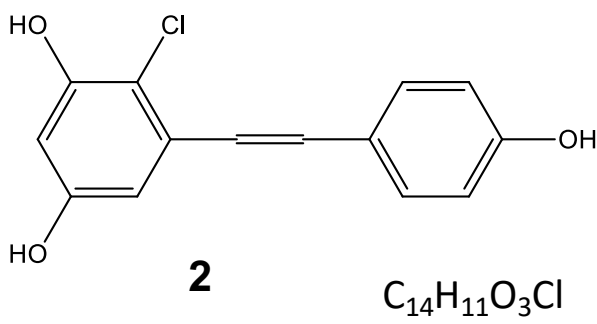

VM-20211012-NEG-2 #2438-2456 RT: 16.01-16.11 AV: 19 NL: 1.29E8  
T: FTMS - p ESI Full ms [100.0000-1000.0000]

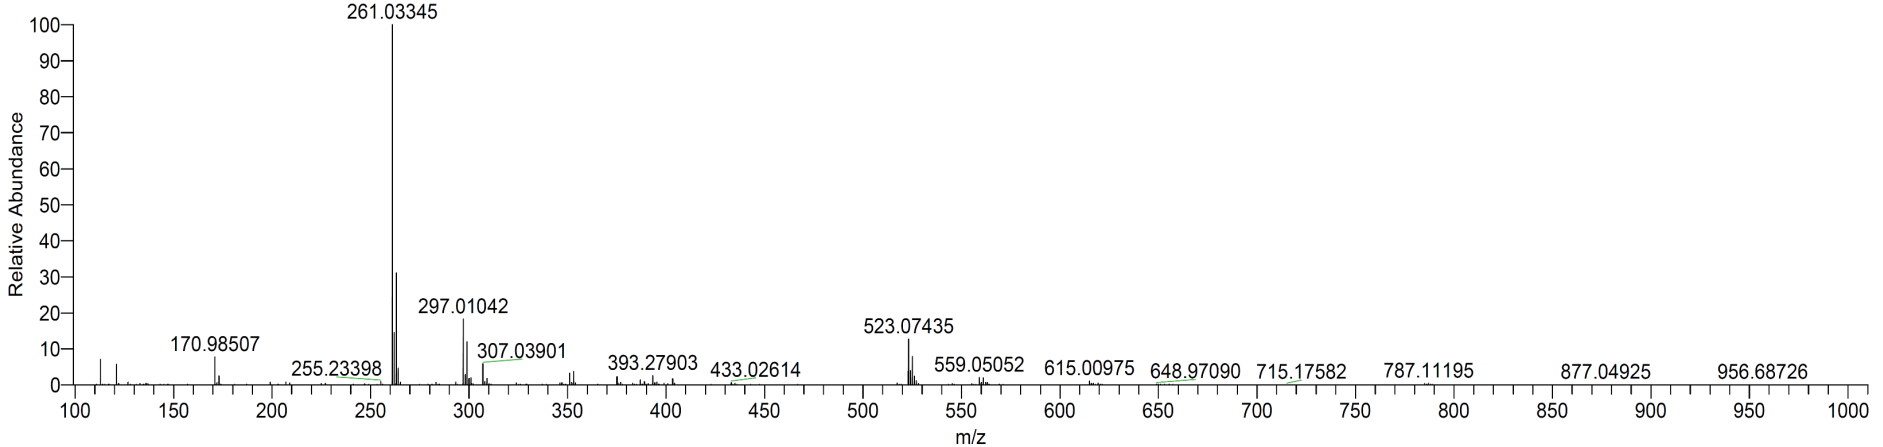

VM-20211012-NEG-2 #2438-2456 RT: 16.01-16.11 AV: 19 NL: 1.29E8  
T: FTMS - p ESI Full ms [100.0000-1000.0000]

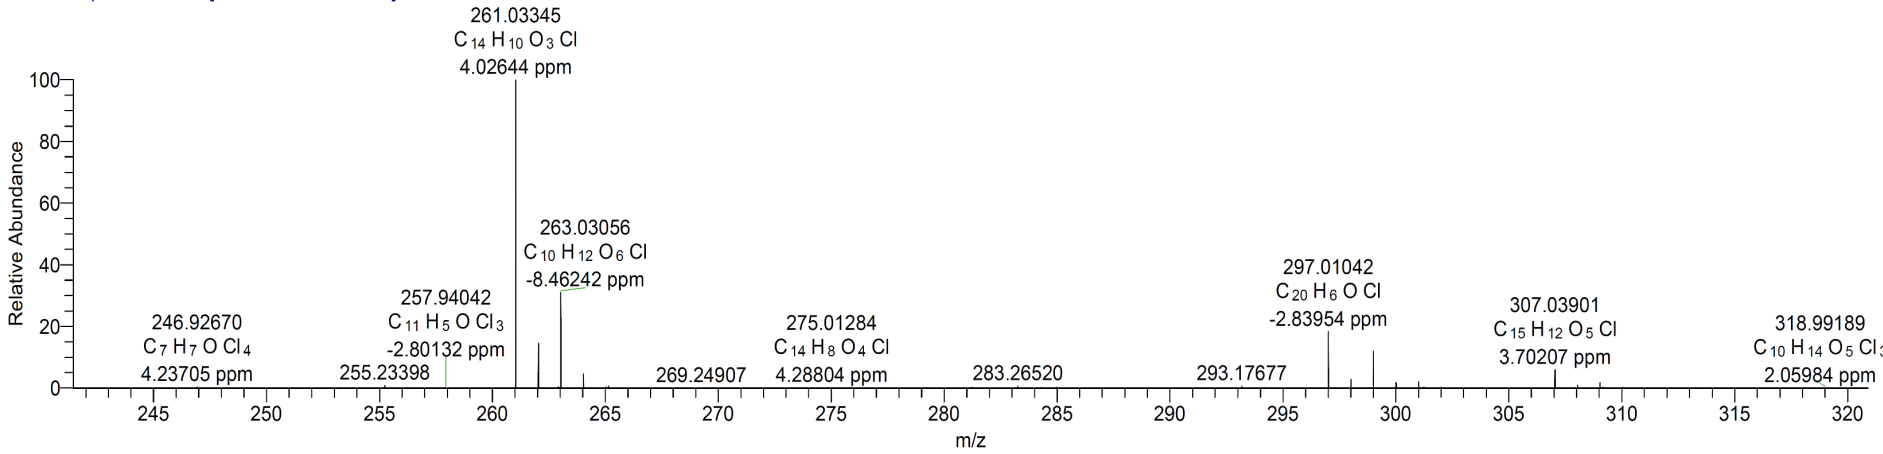

**Figure S10.** Compound **3**, HRMS (negative mode).

OA-220624-NEG #260-275 RT: 1.66-1.74 AV: 16 NL: 1.52E8  
T: FTMS - p ESI Full ms [150.0000-1000.0000]

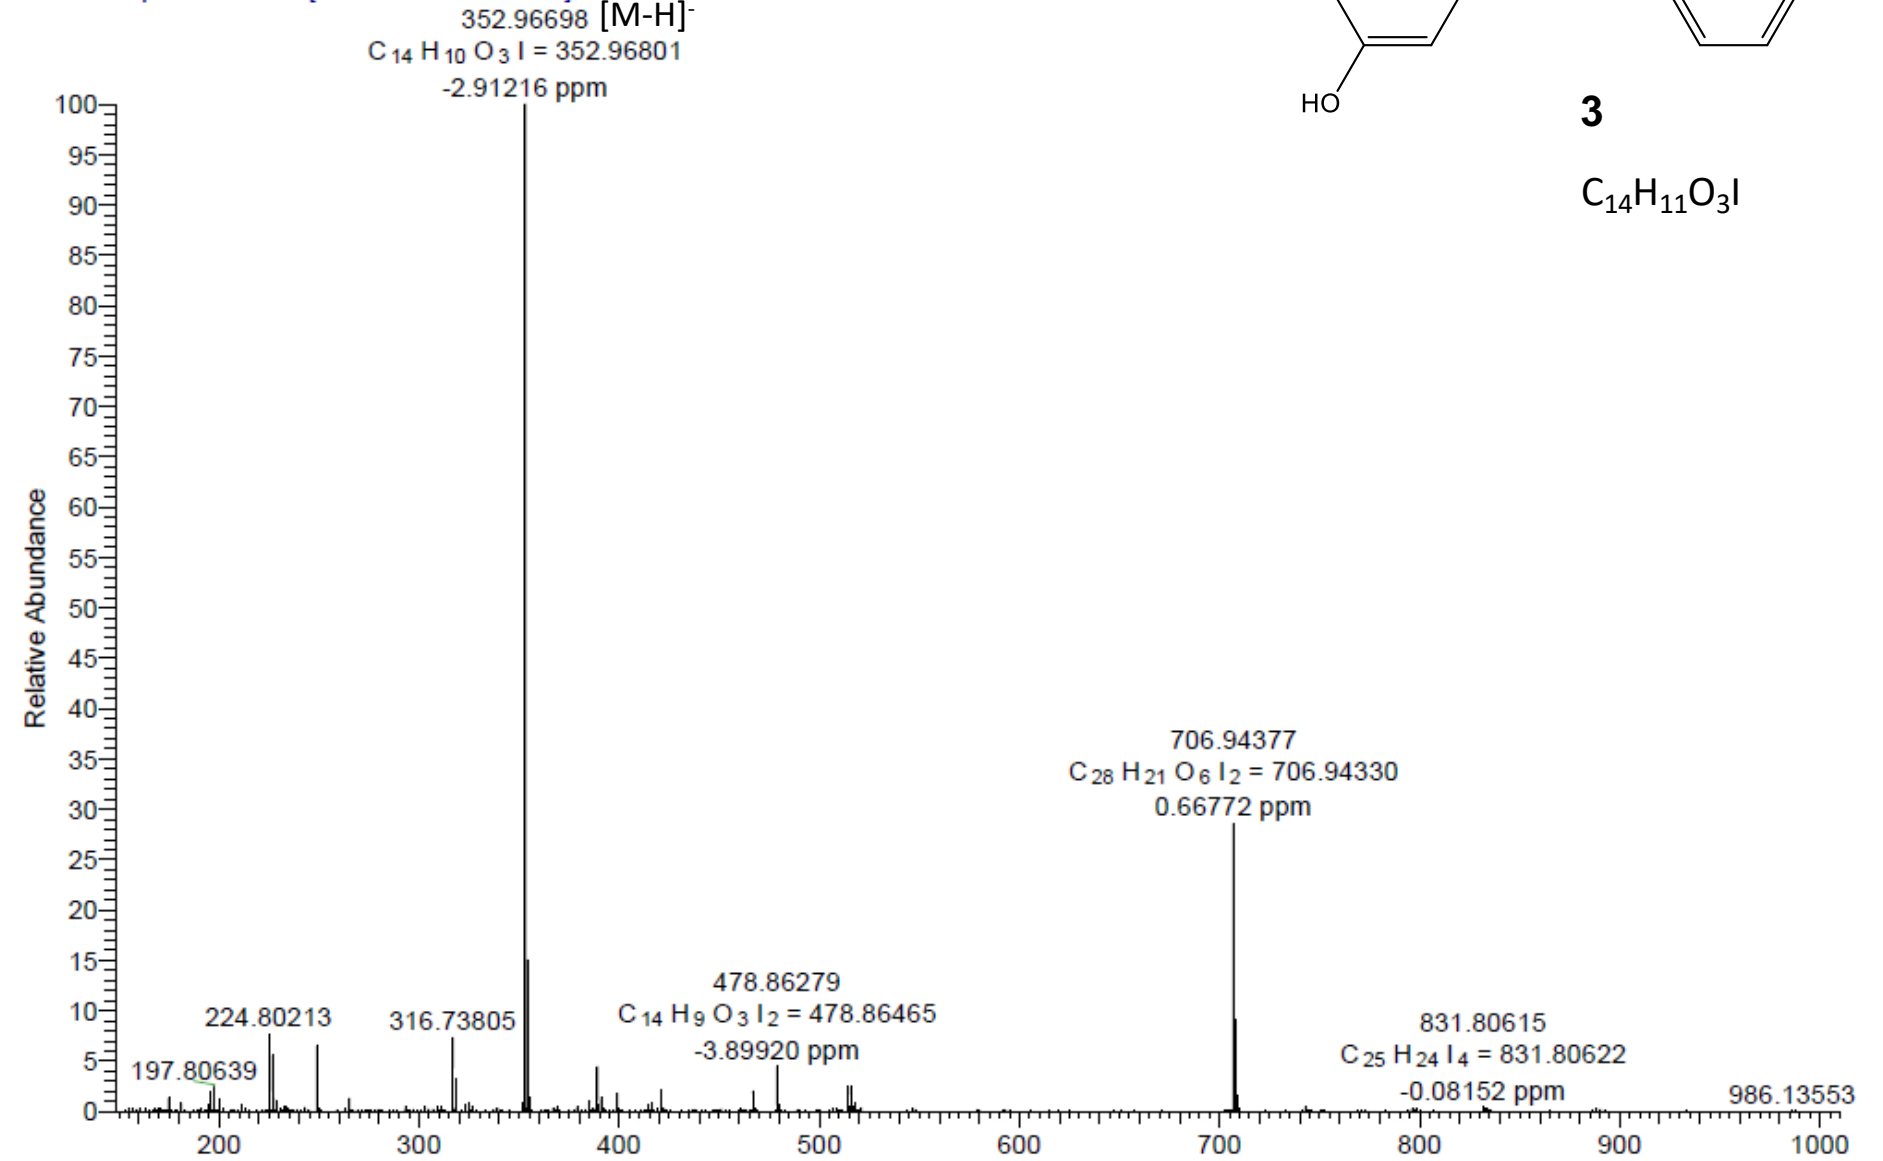

**Figure S11.** Compound **4**, HRMS (positive mode).

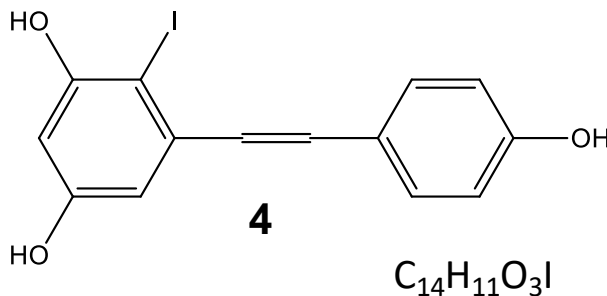

oa-20200930 #2070-2094 RT: 11.82-11.95 AV: 25 NL: 1.46E7  
T: FTMS + p ESI Full lock ms [100.0000-1000.0000]

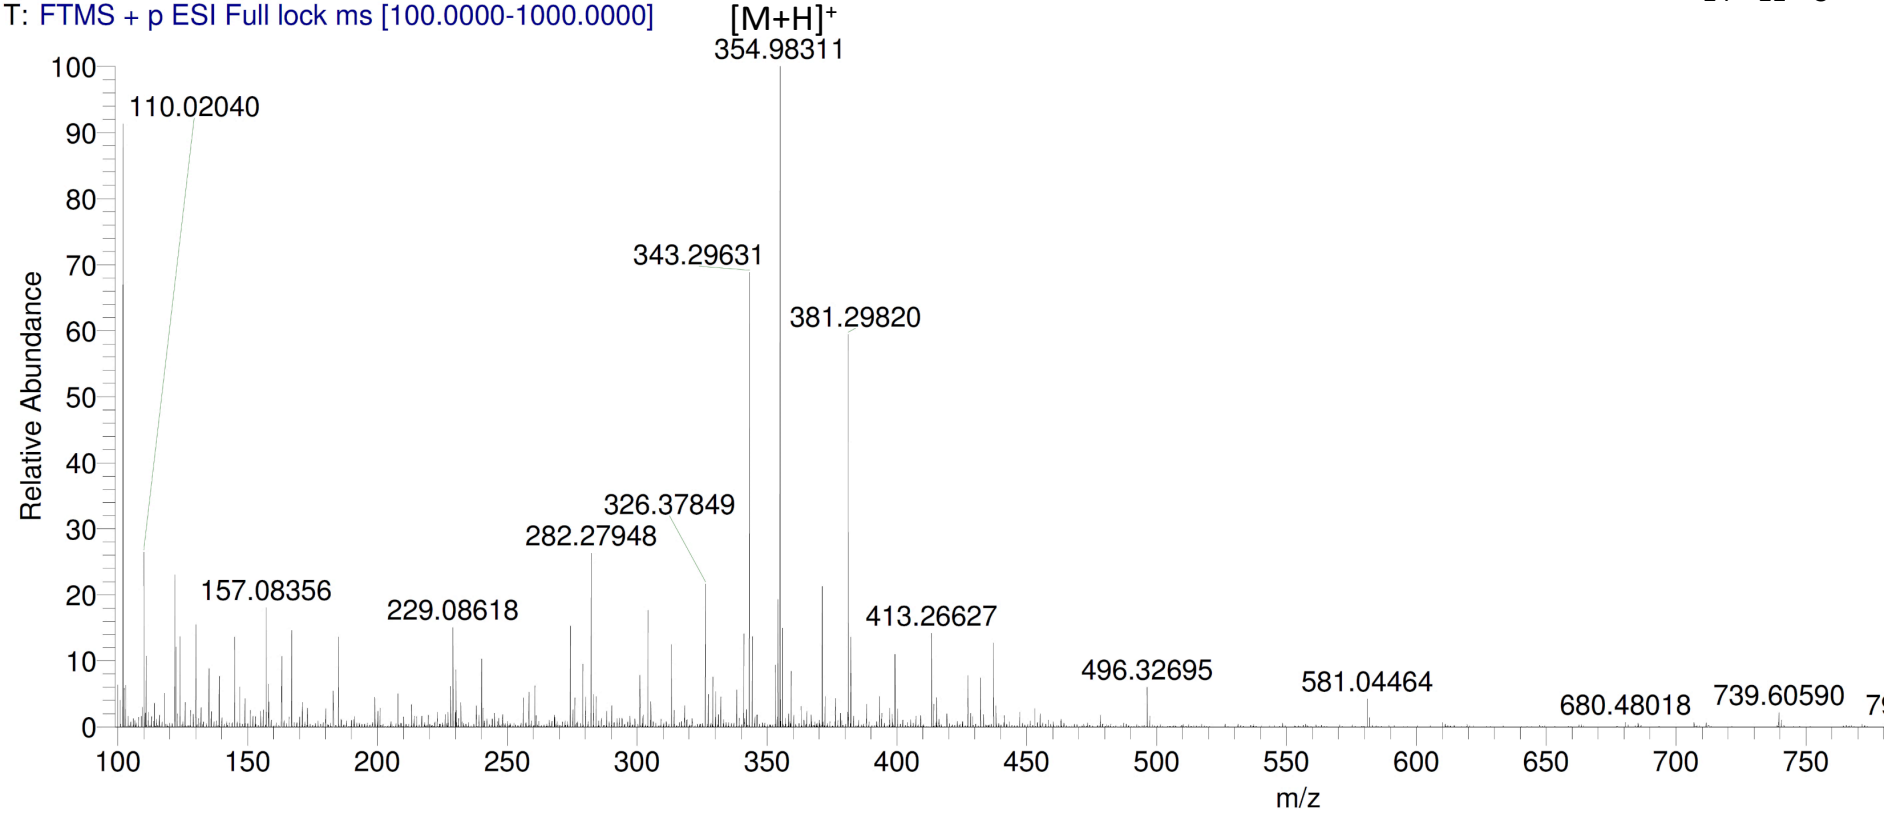

**Figure S12.** Compound **5**, HRMS (positive mode).

oa-20200930 #1405-1427 RT: 7.97-8.09 AV: 23 NL: 1.89E7  
T: FTMS + p ESI Full lock ms [100.0000-1000.0000]

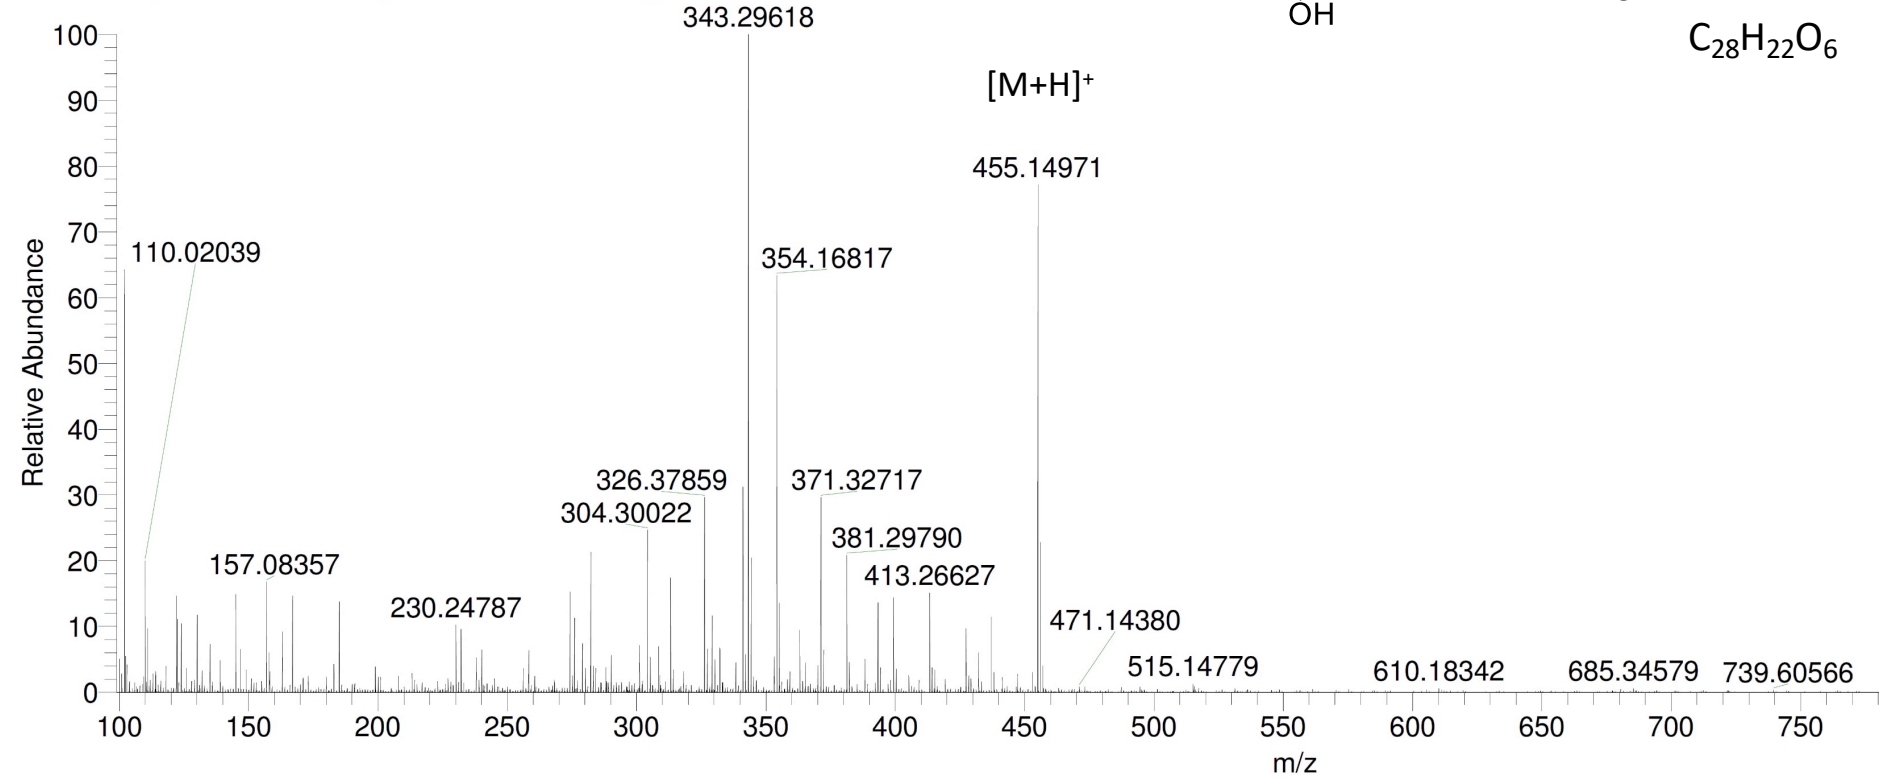

**Figure S13.** Compound **6**, HRMS (positive mode).

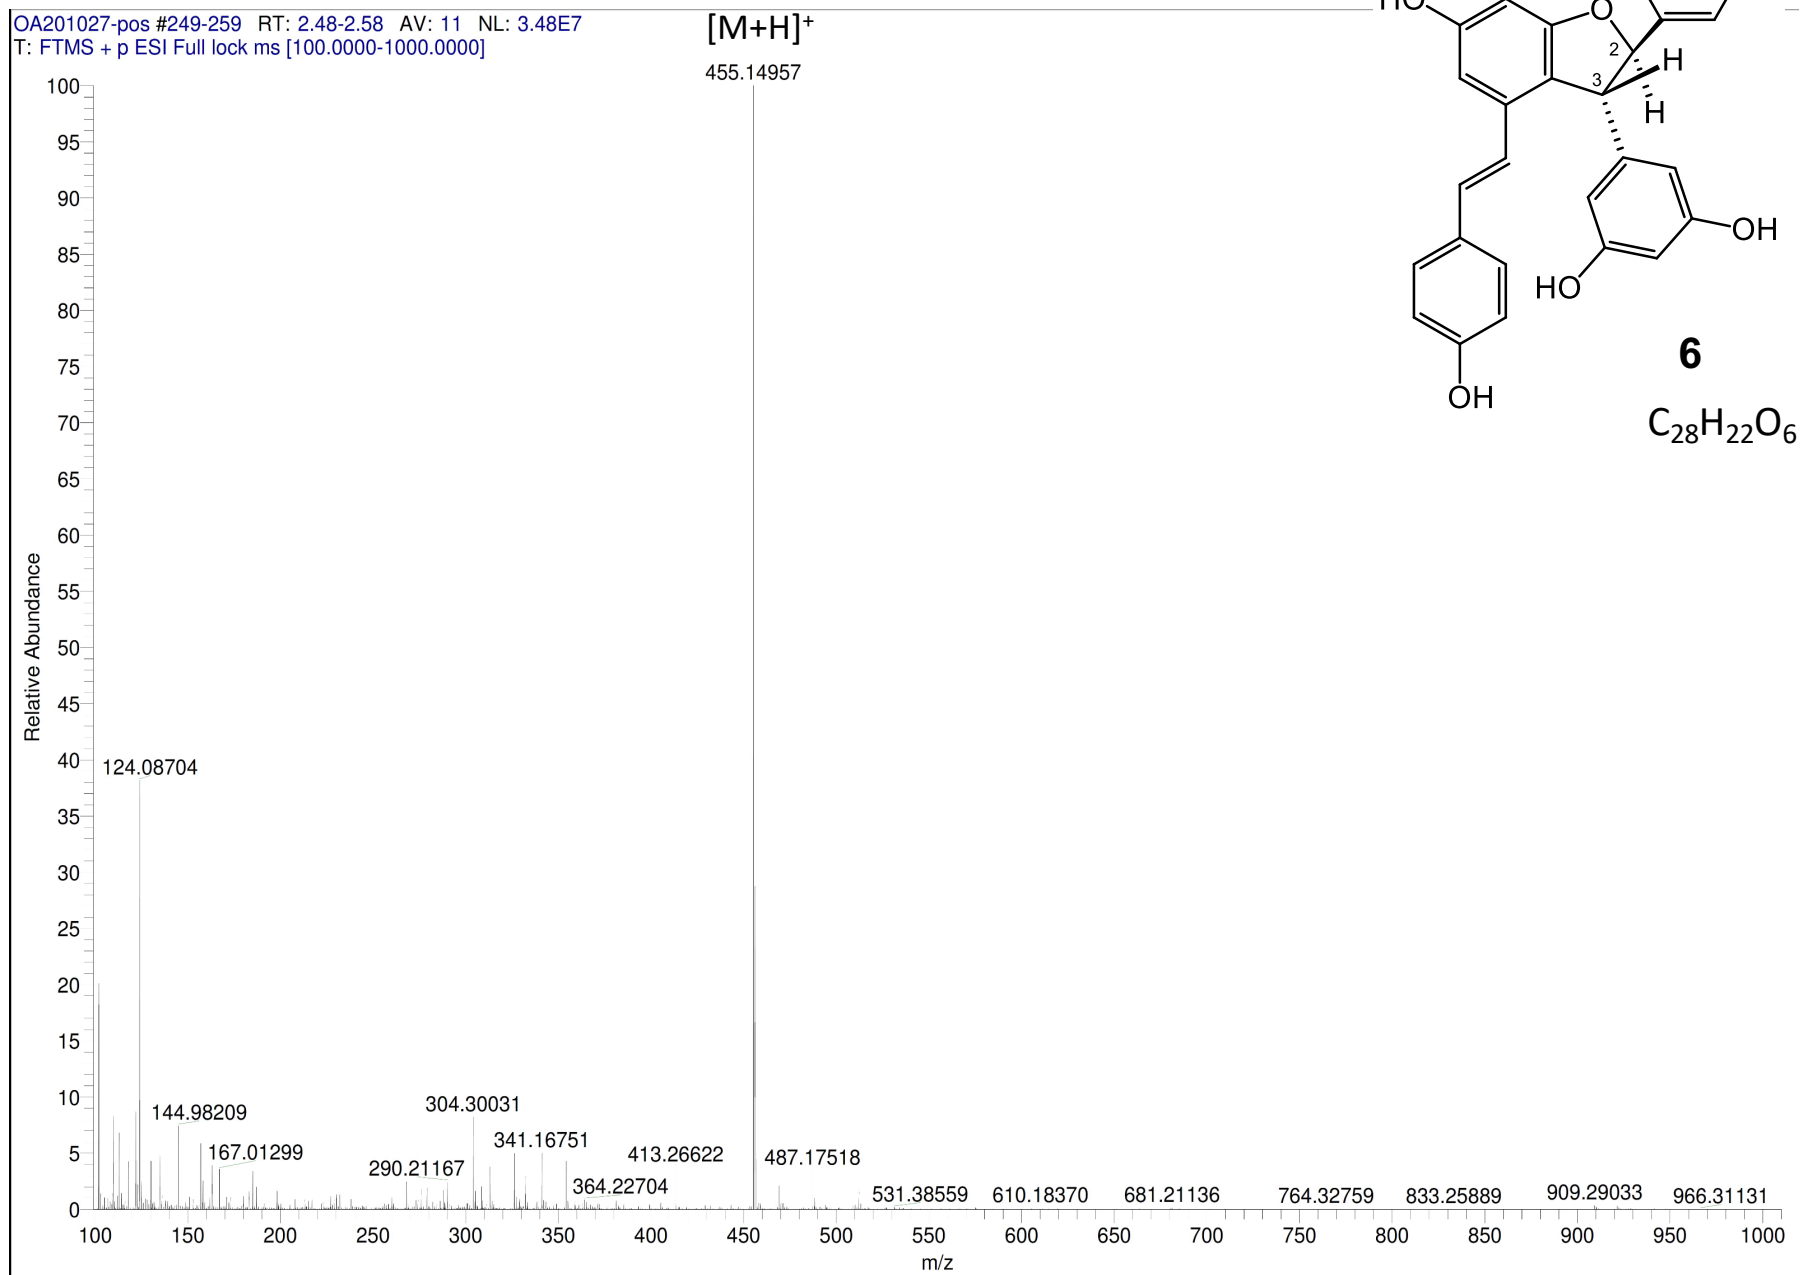



**Figure S14.** Compound **7**, HRMS (negative mode).

OA-220624-NEG #387-410 RT: 2.45-2.57 AV: 24 NL: 1.74E8  
T: FTMS - p ESI Full ms [150.0000-1000.0000]

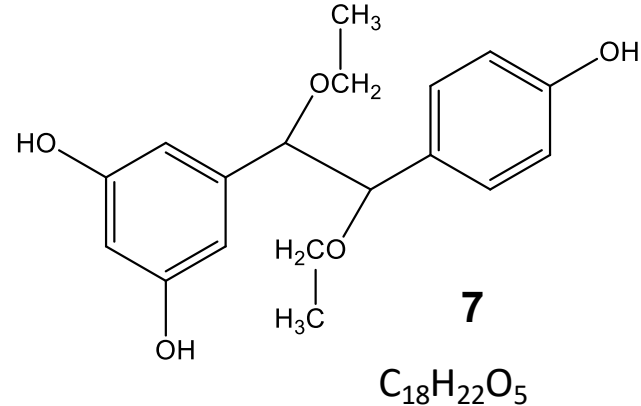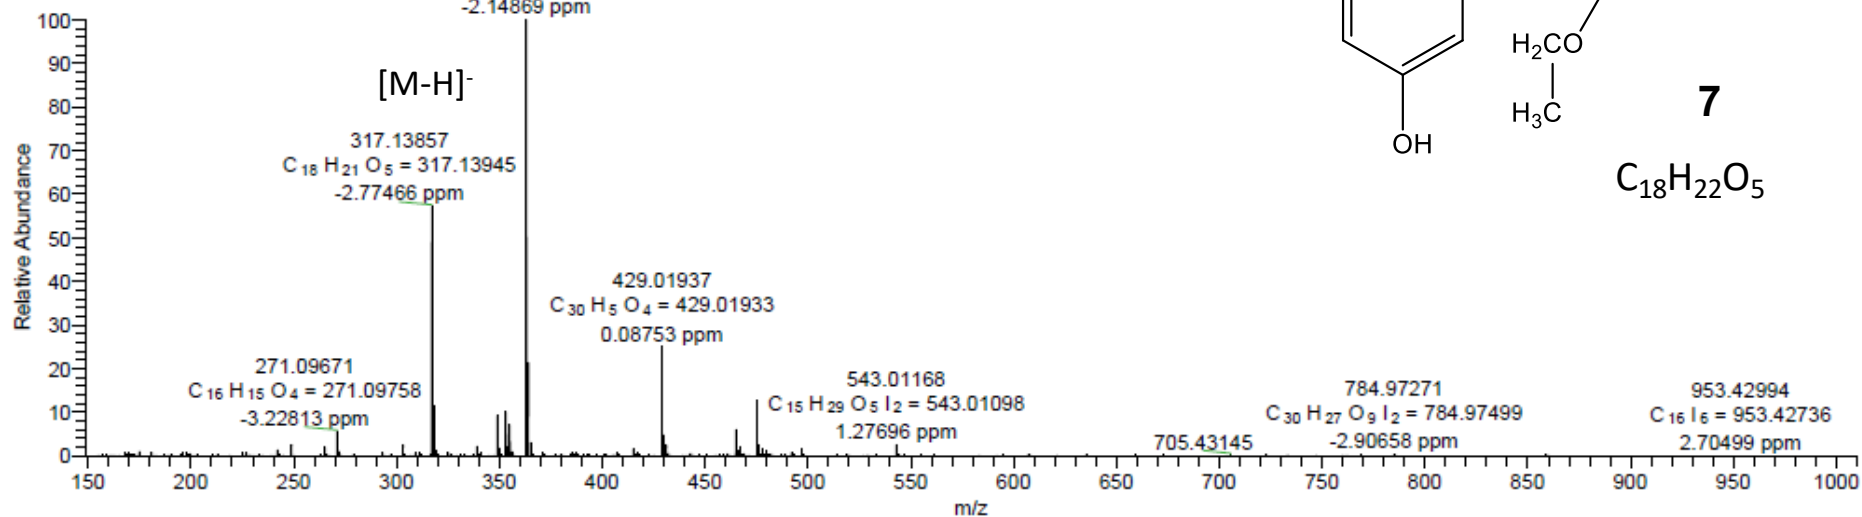

OA-220624-NEG #387-410 RT: 2.45-2.57 AV: 24 NL: 1.74E8  
T: FTMS - p ESI Full ms [150.0000-1000.0000]

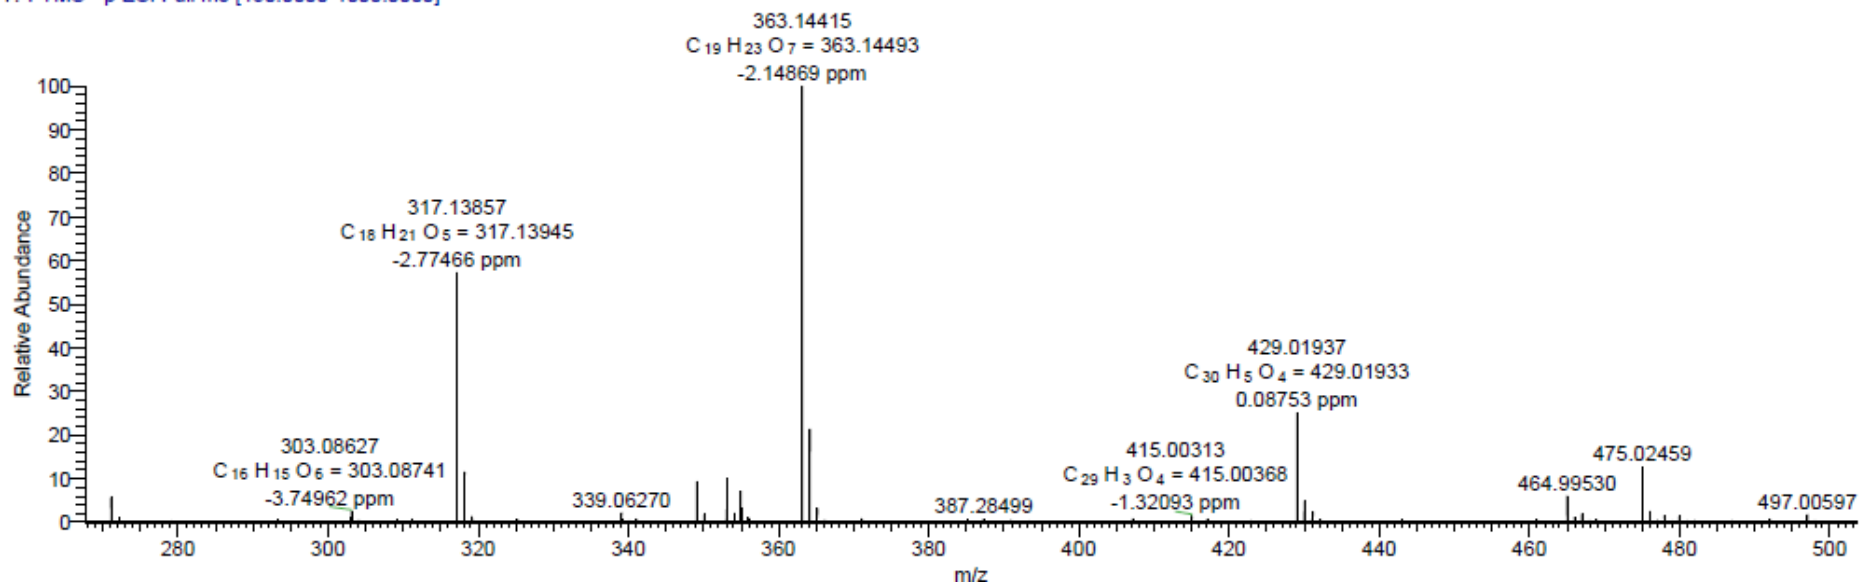

Figure S15. Compound 8, HRMS (positive mode).

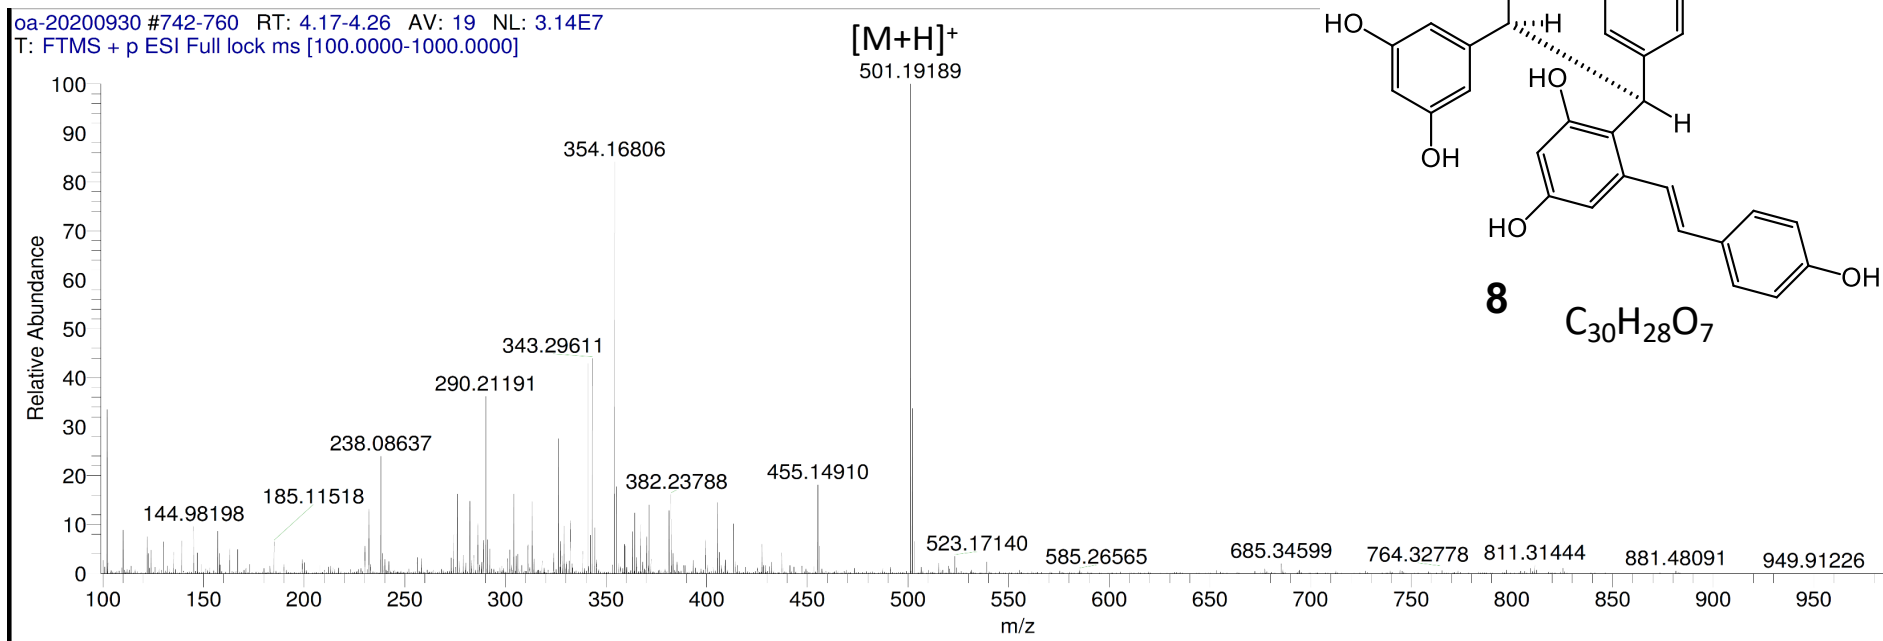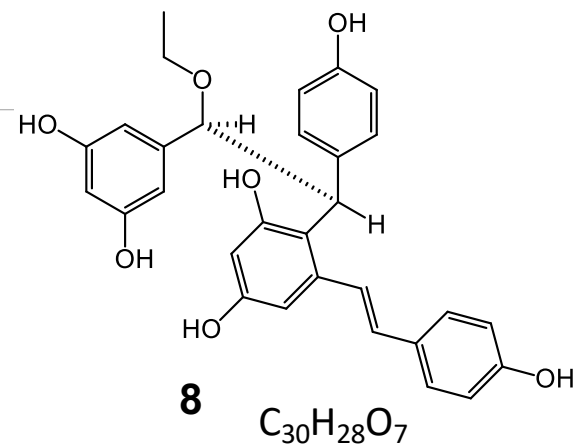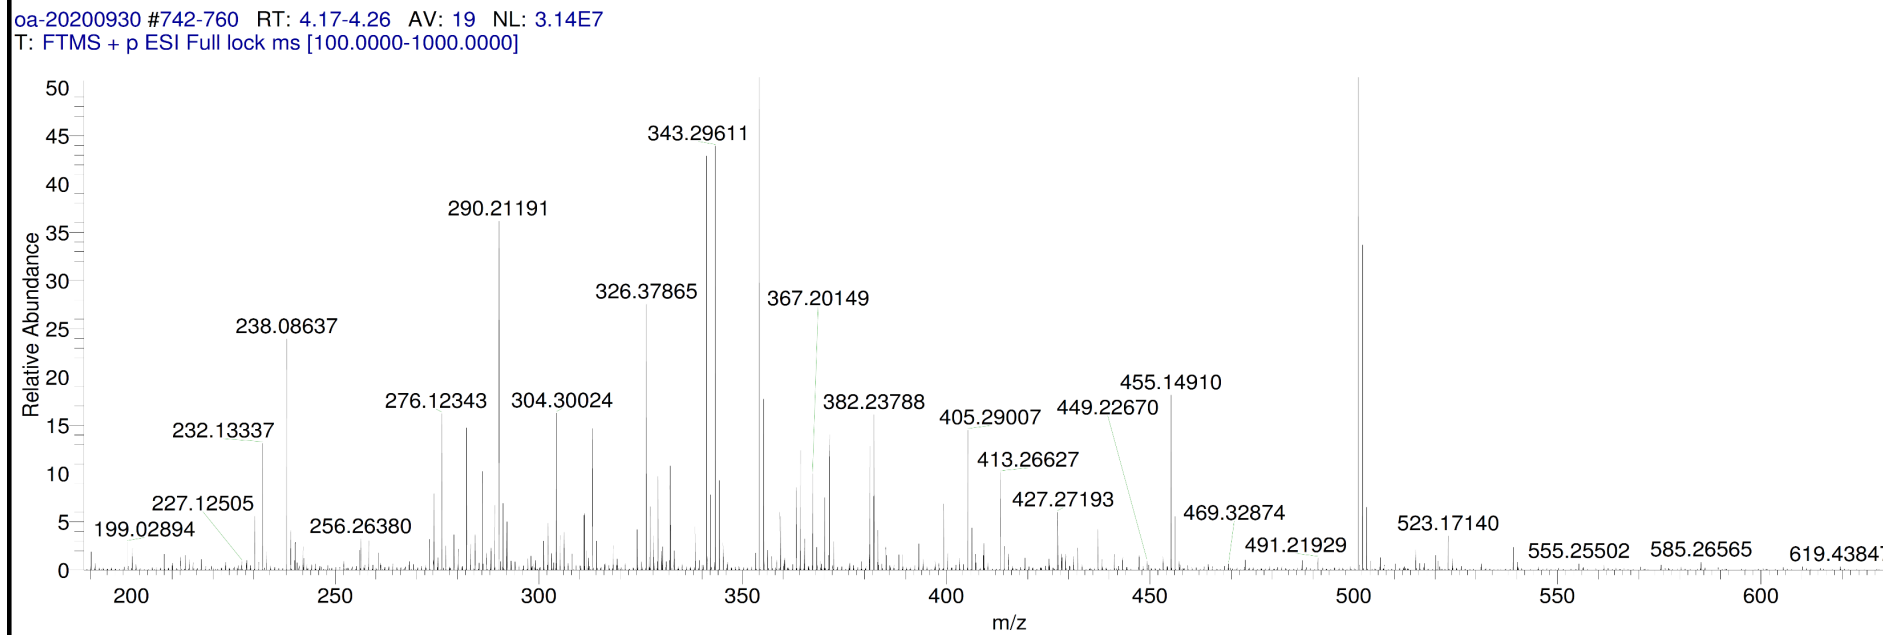

Figure S16. Compound 2, <sup>1</sup>H NMR spectrum.

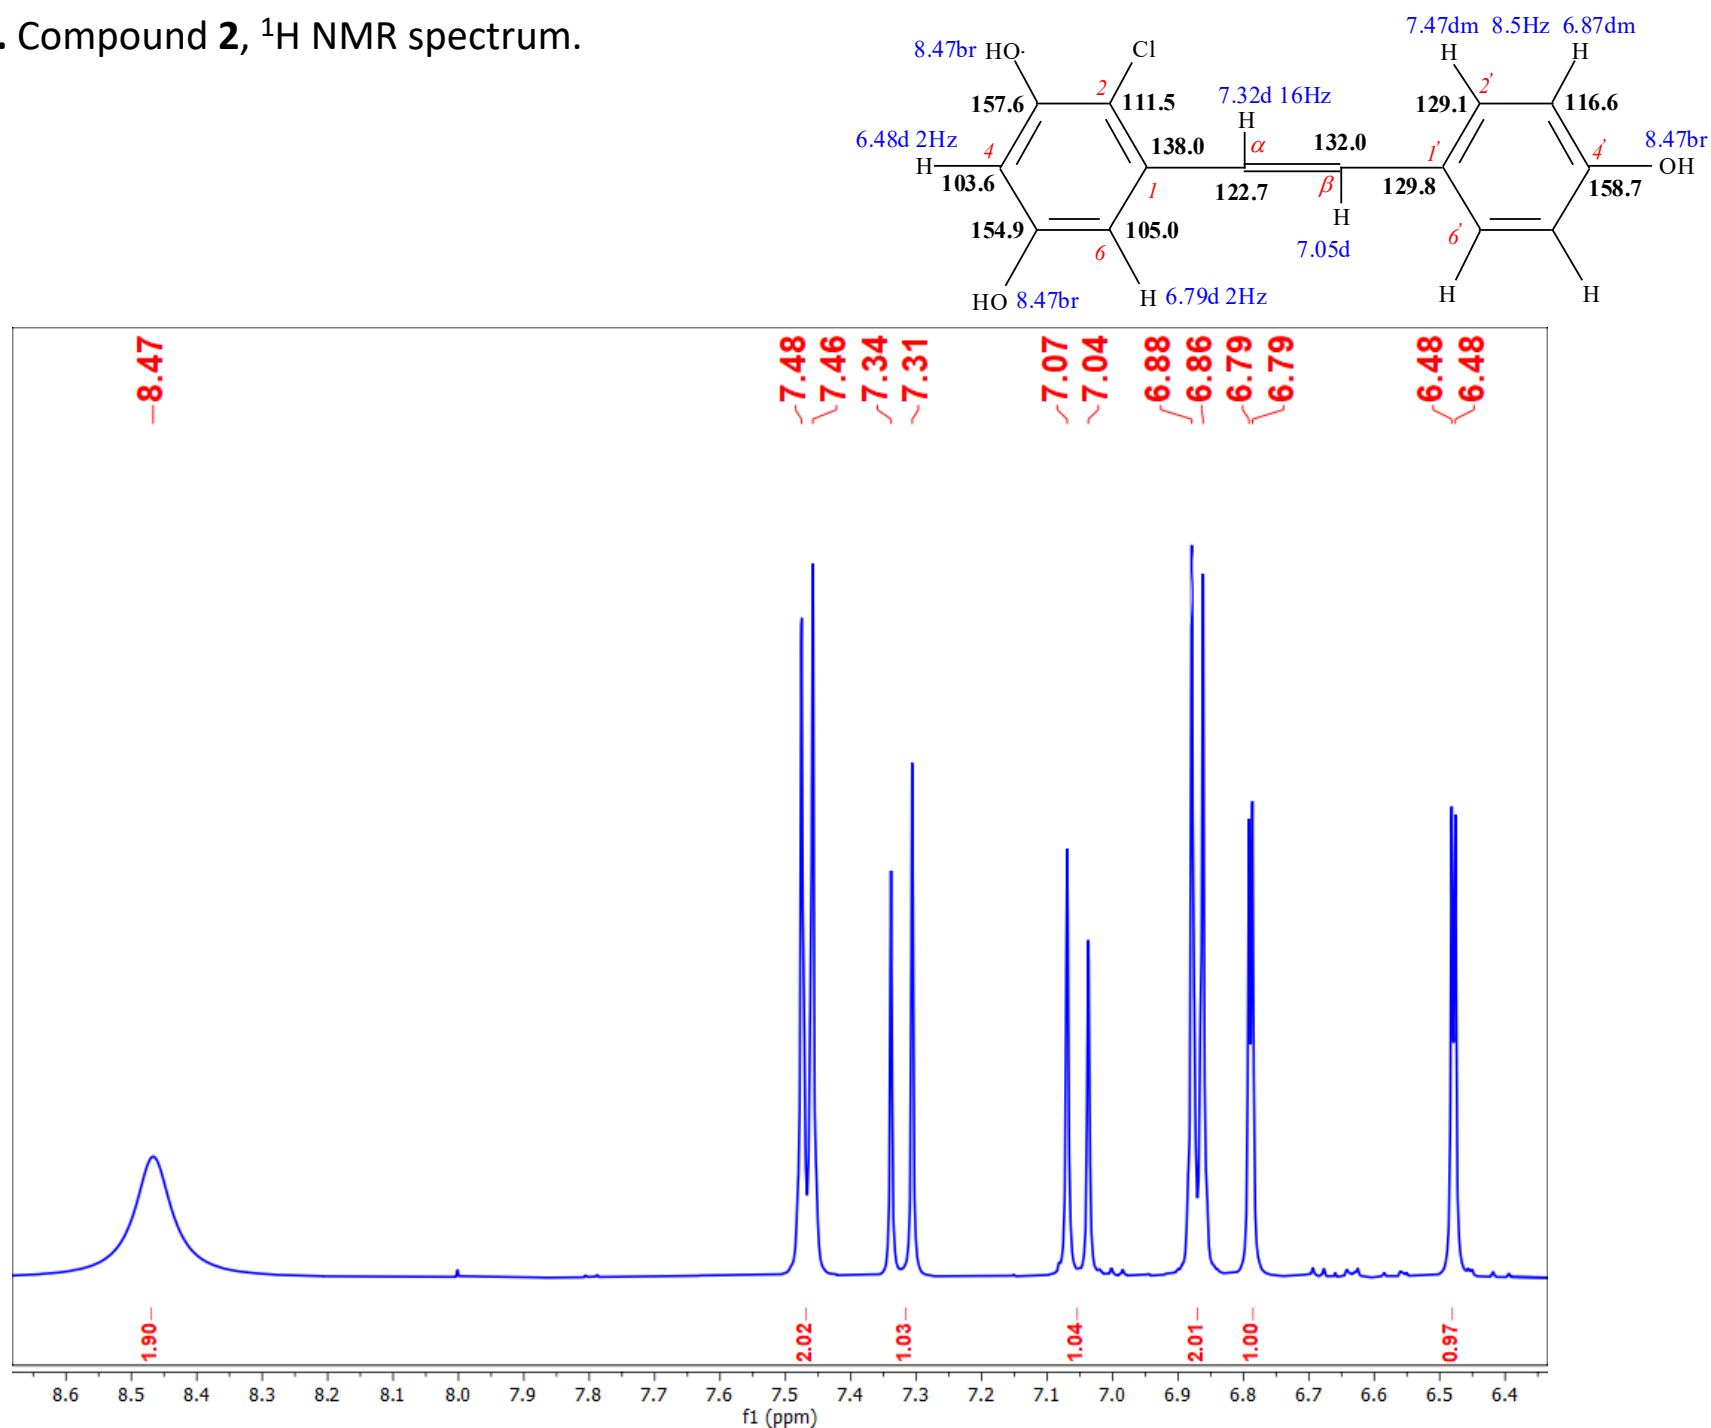

Figure S17. Compound 2, <sup>13</sup>C, APT NMR spectrum

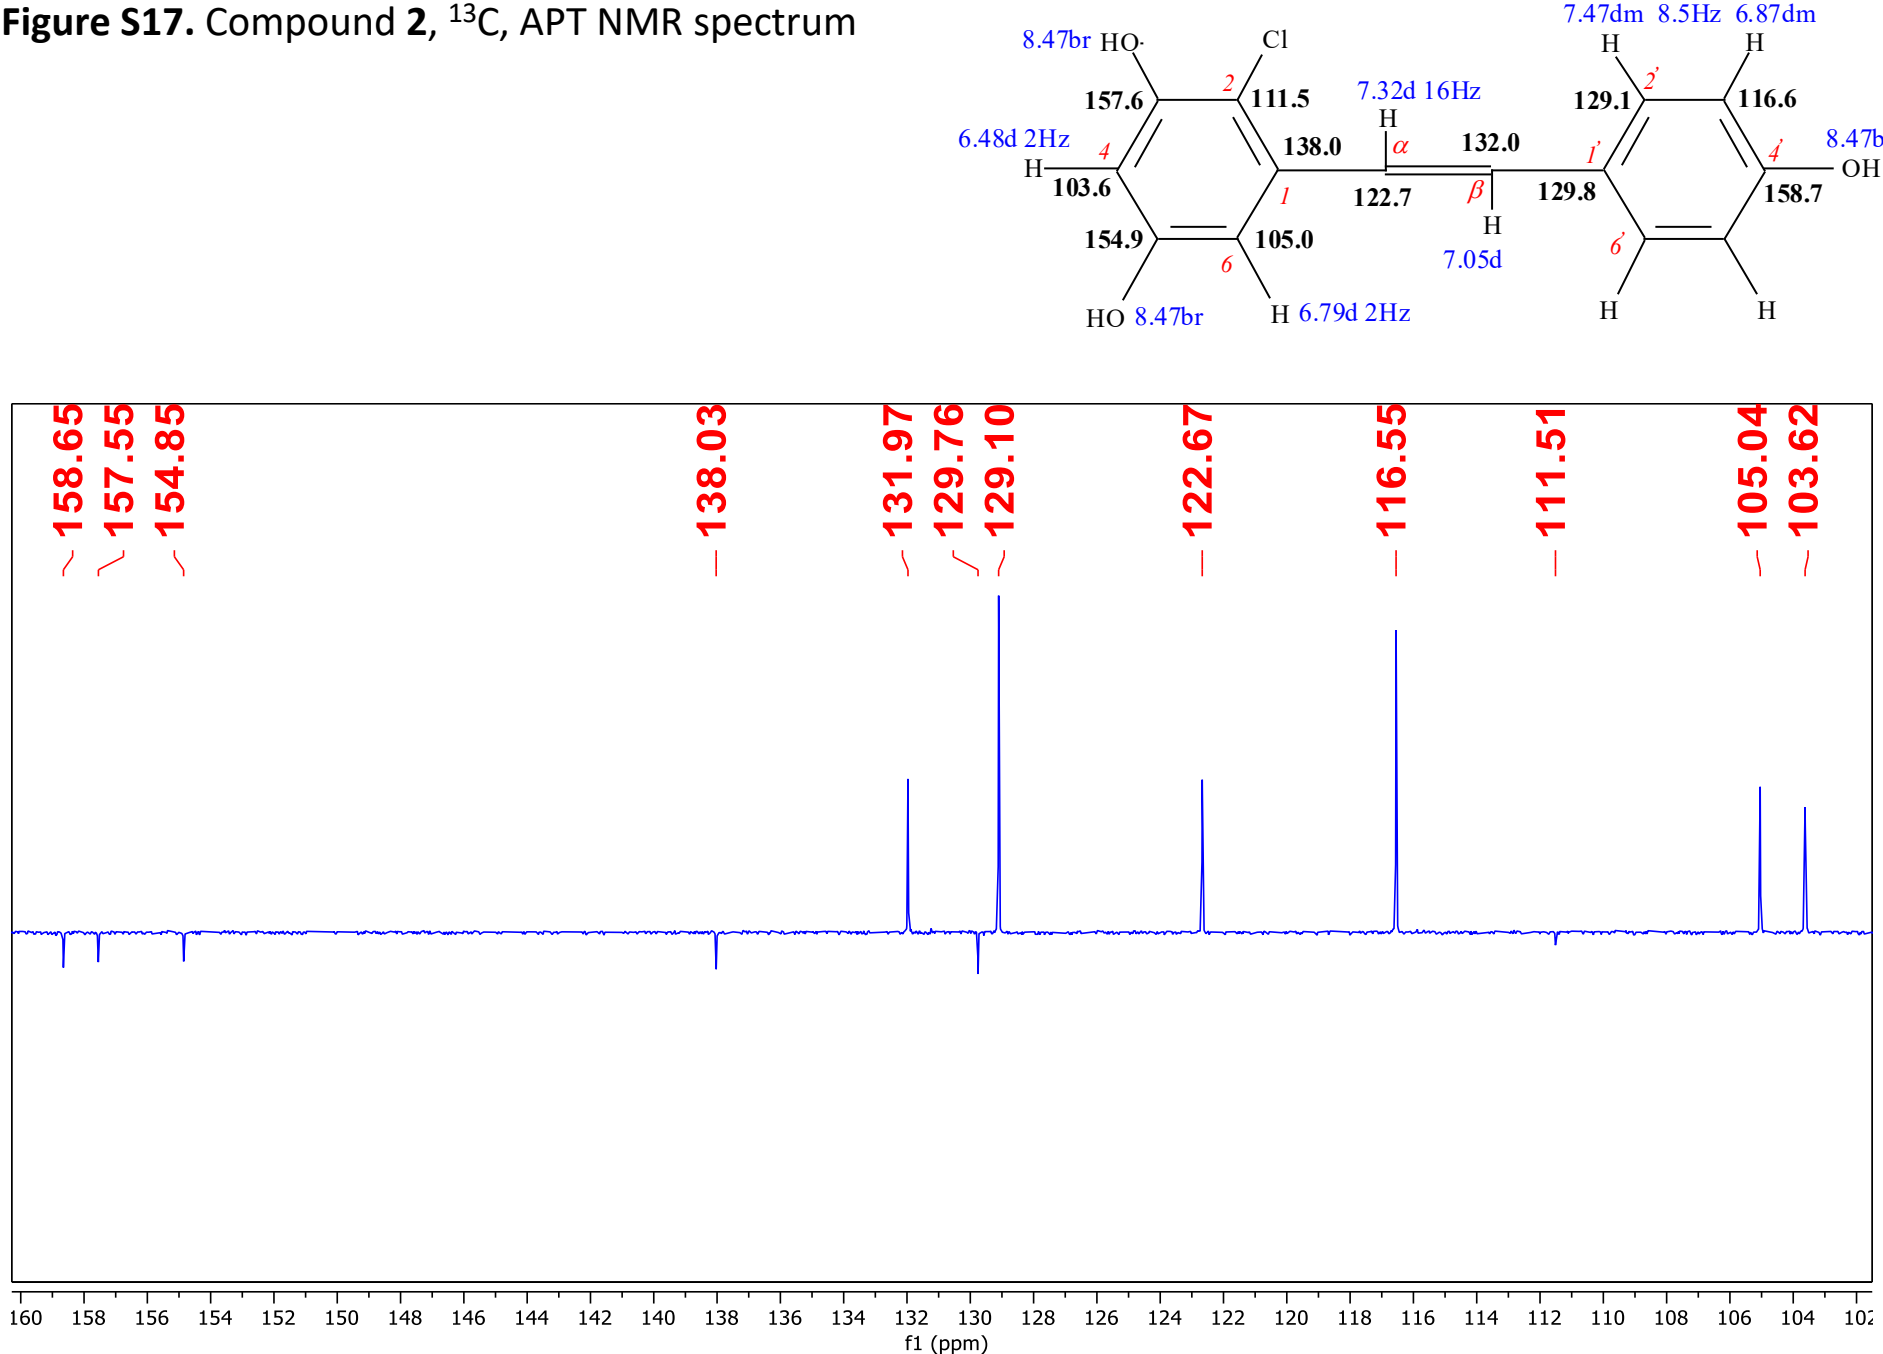

**Figure S18.** Compound **2**, HSQC and HMBC spectra.

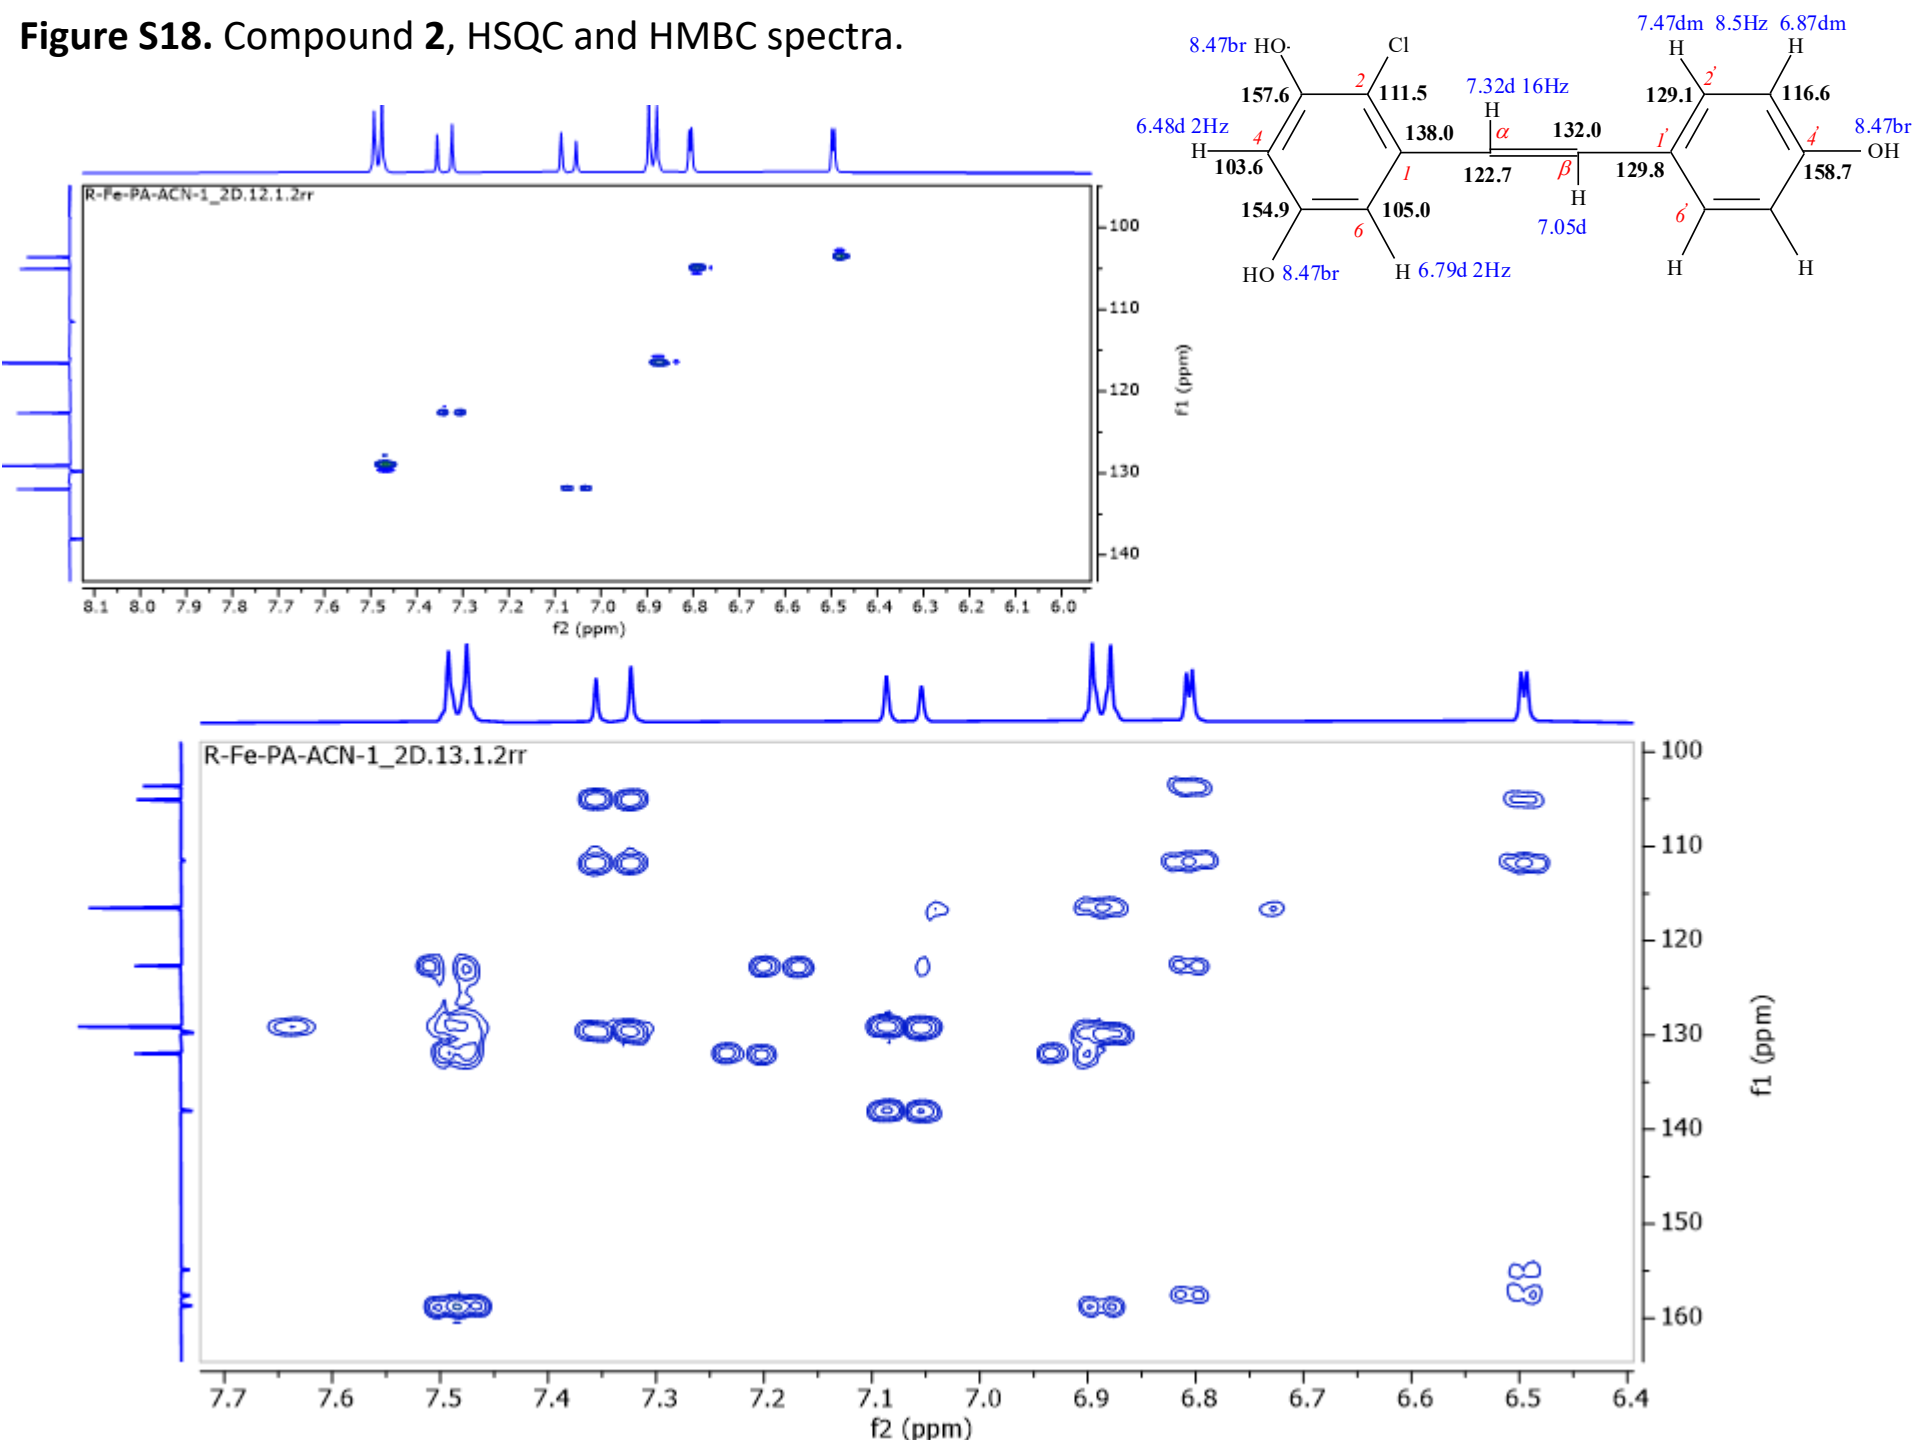

**Figure S19.** Compound **2**, COSY and NOESY spectra.

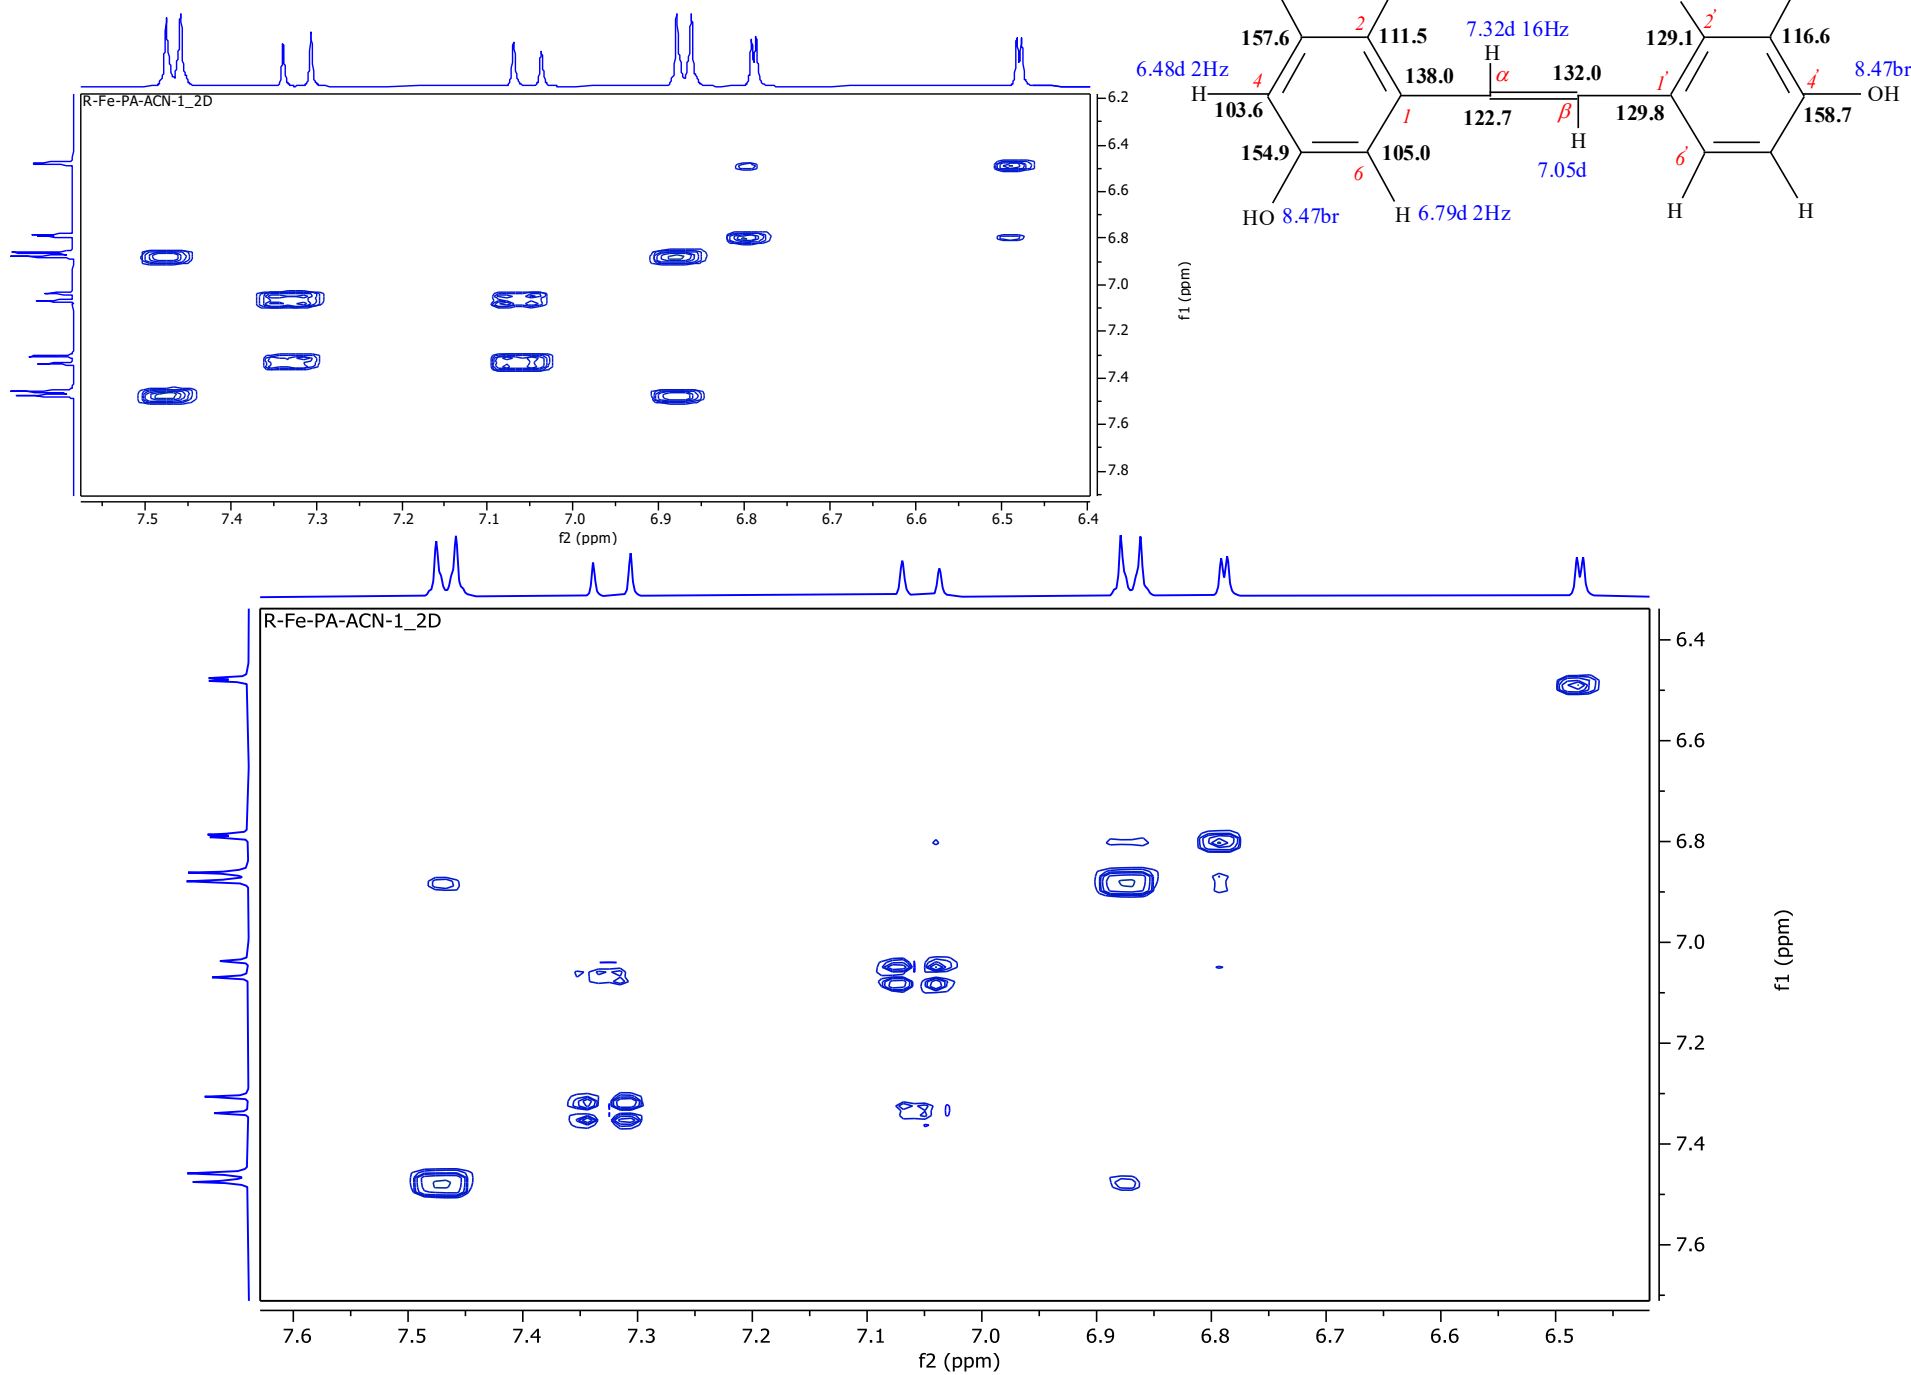

**Figure S20.** Compound **3**, <sup>1</sup>H NMR spectrum.

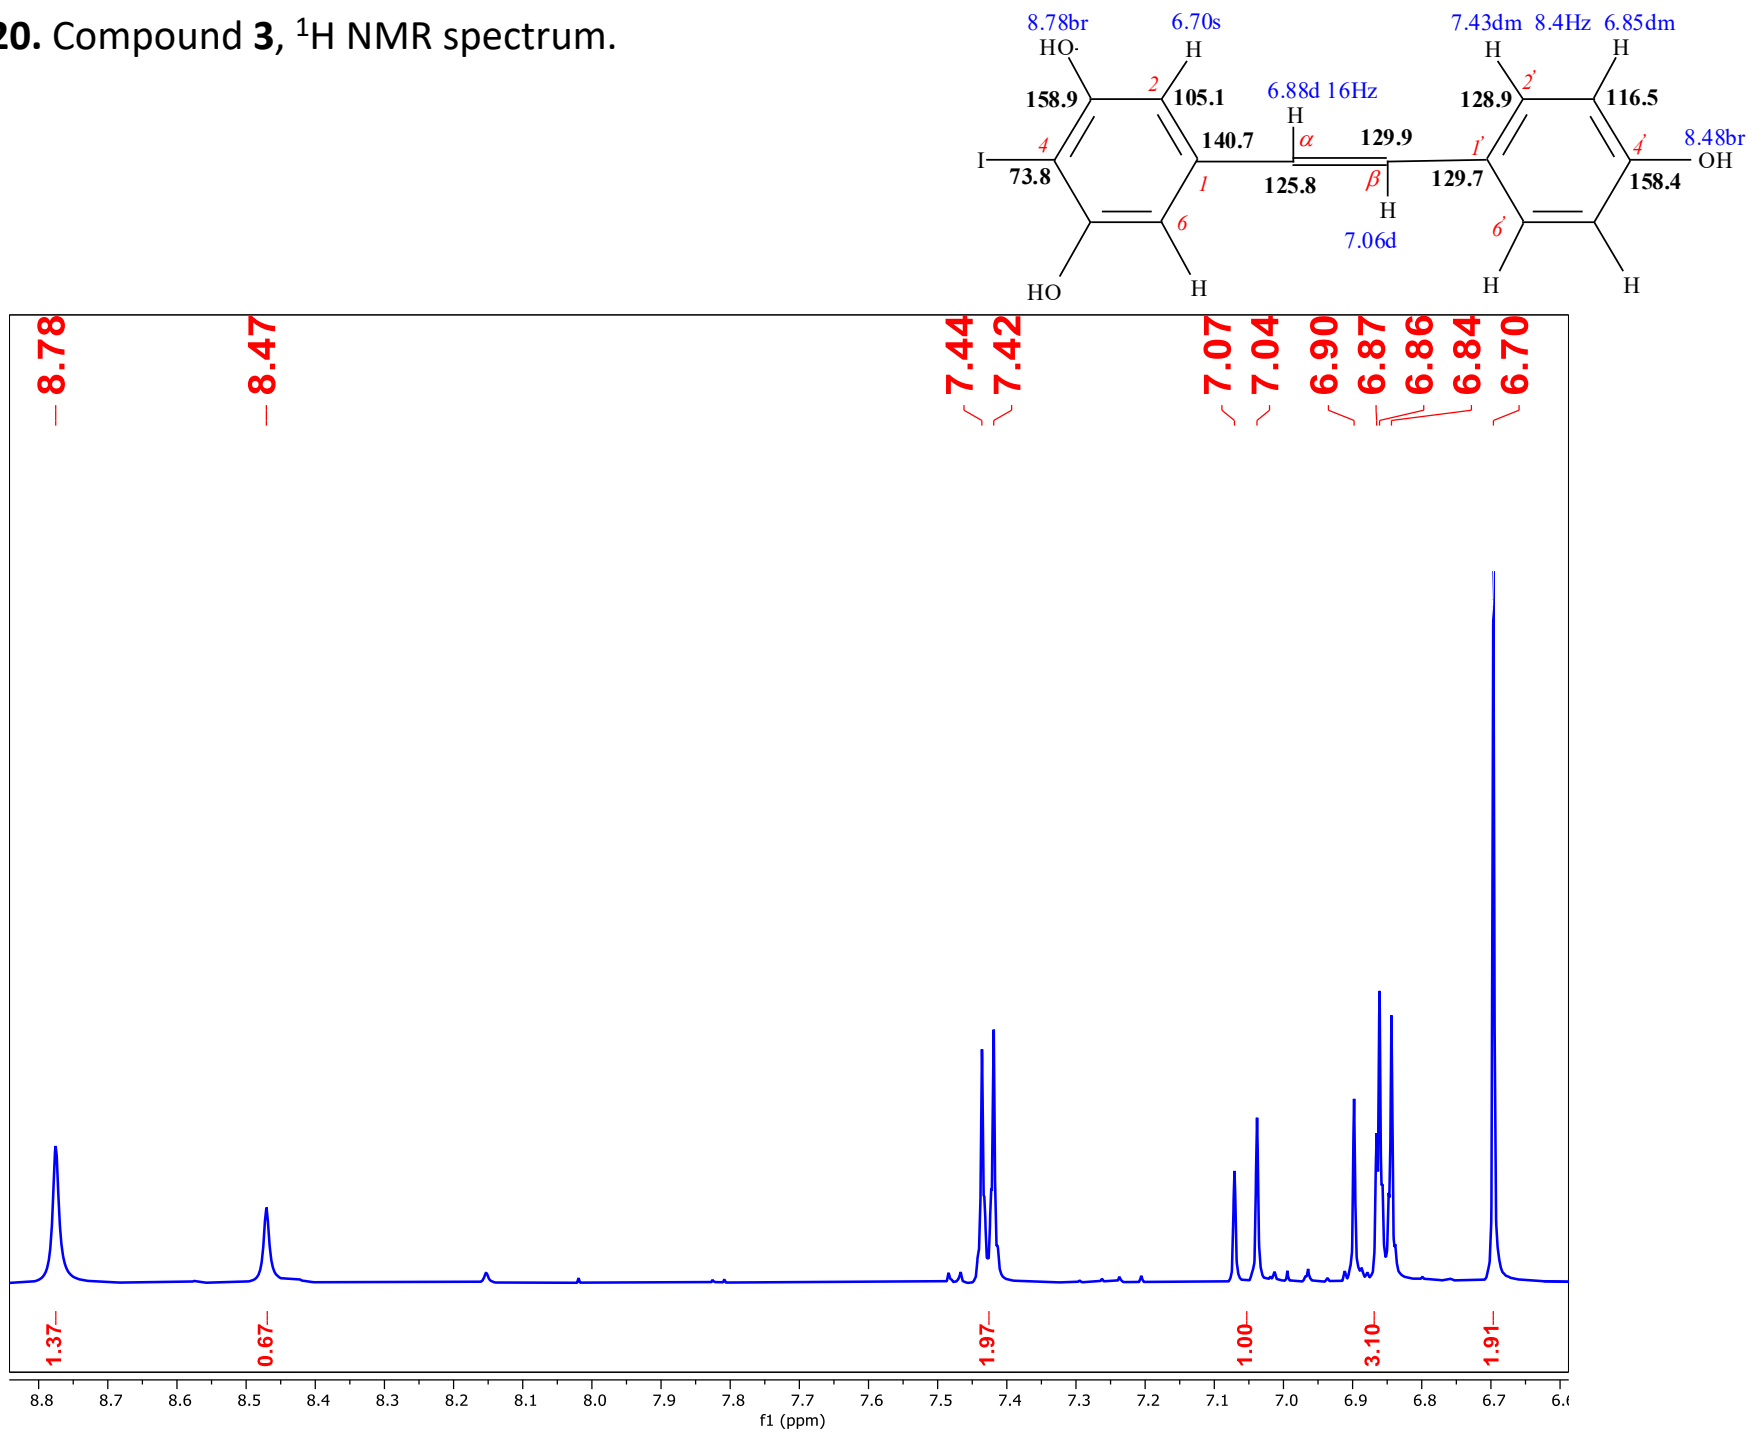

**Figure S21.** Compound **3**,  $^{13}\text{C}$ , APT NMR spectrum.

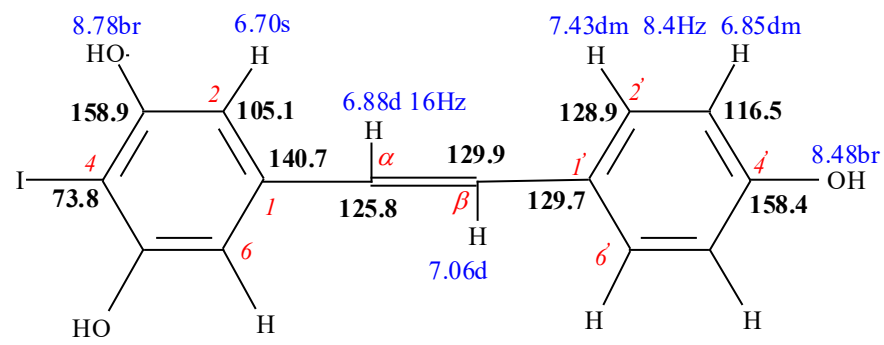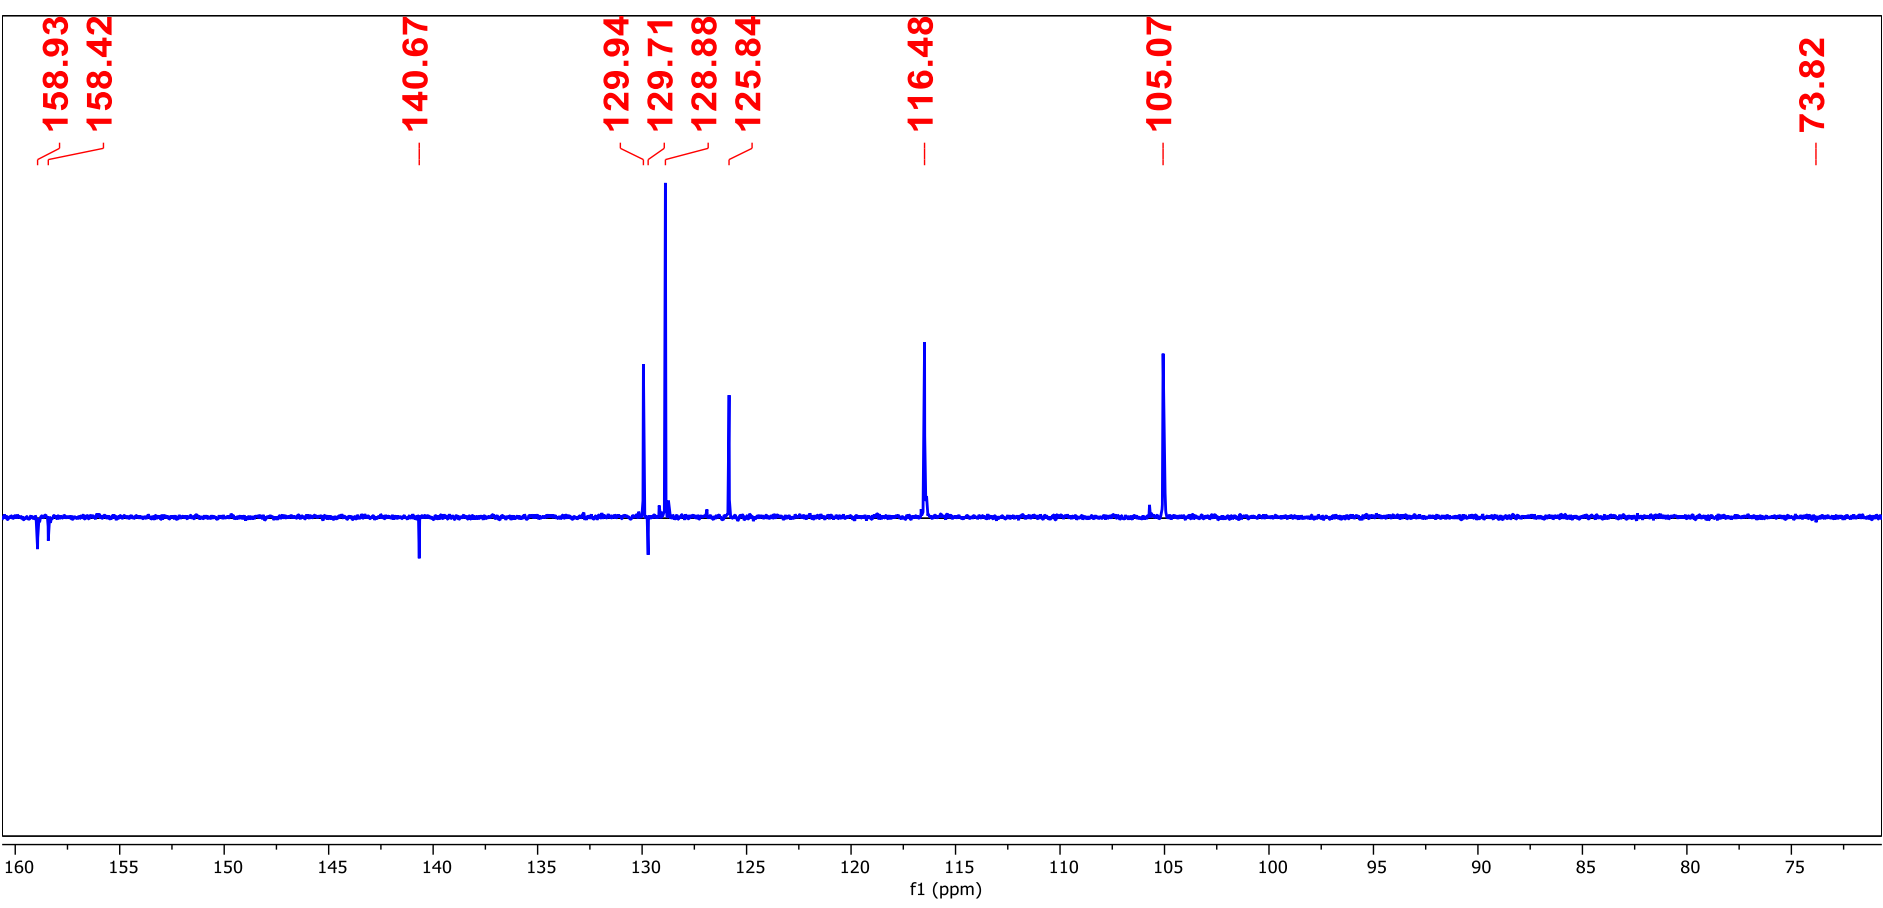



**Figure S22.** Compound **3**, HSQC and HMBCs spectra.

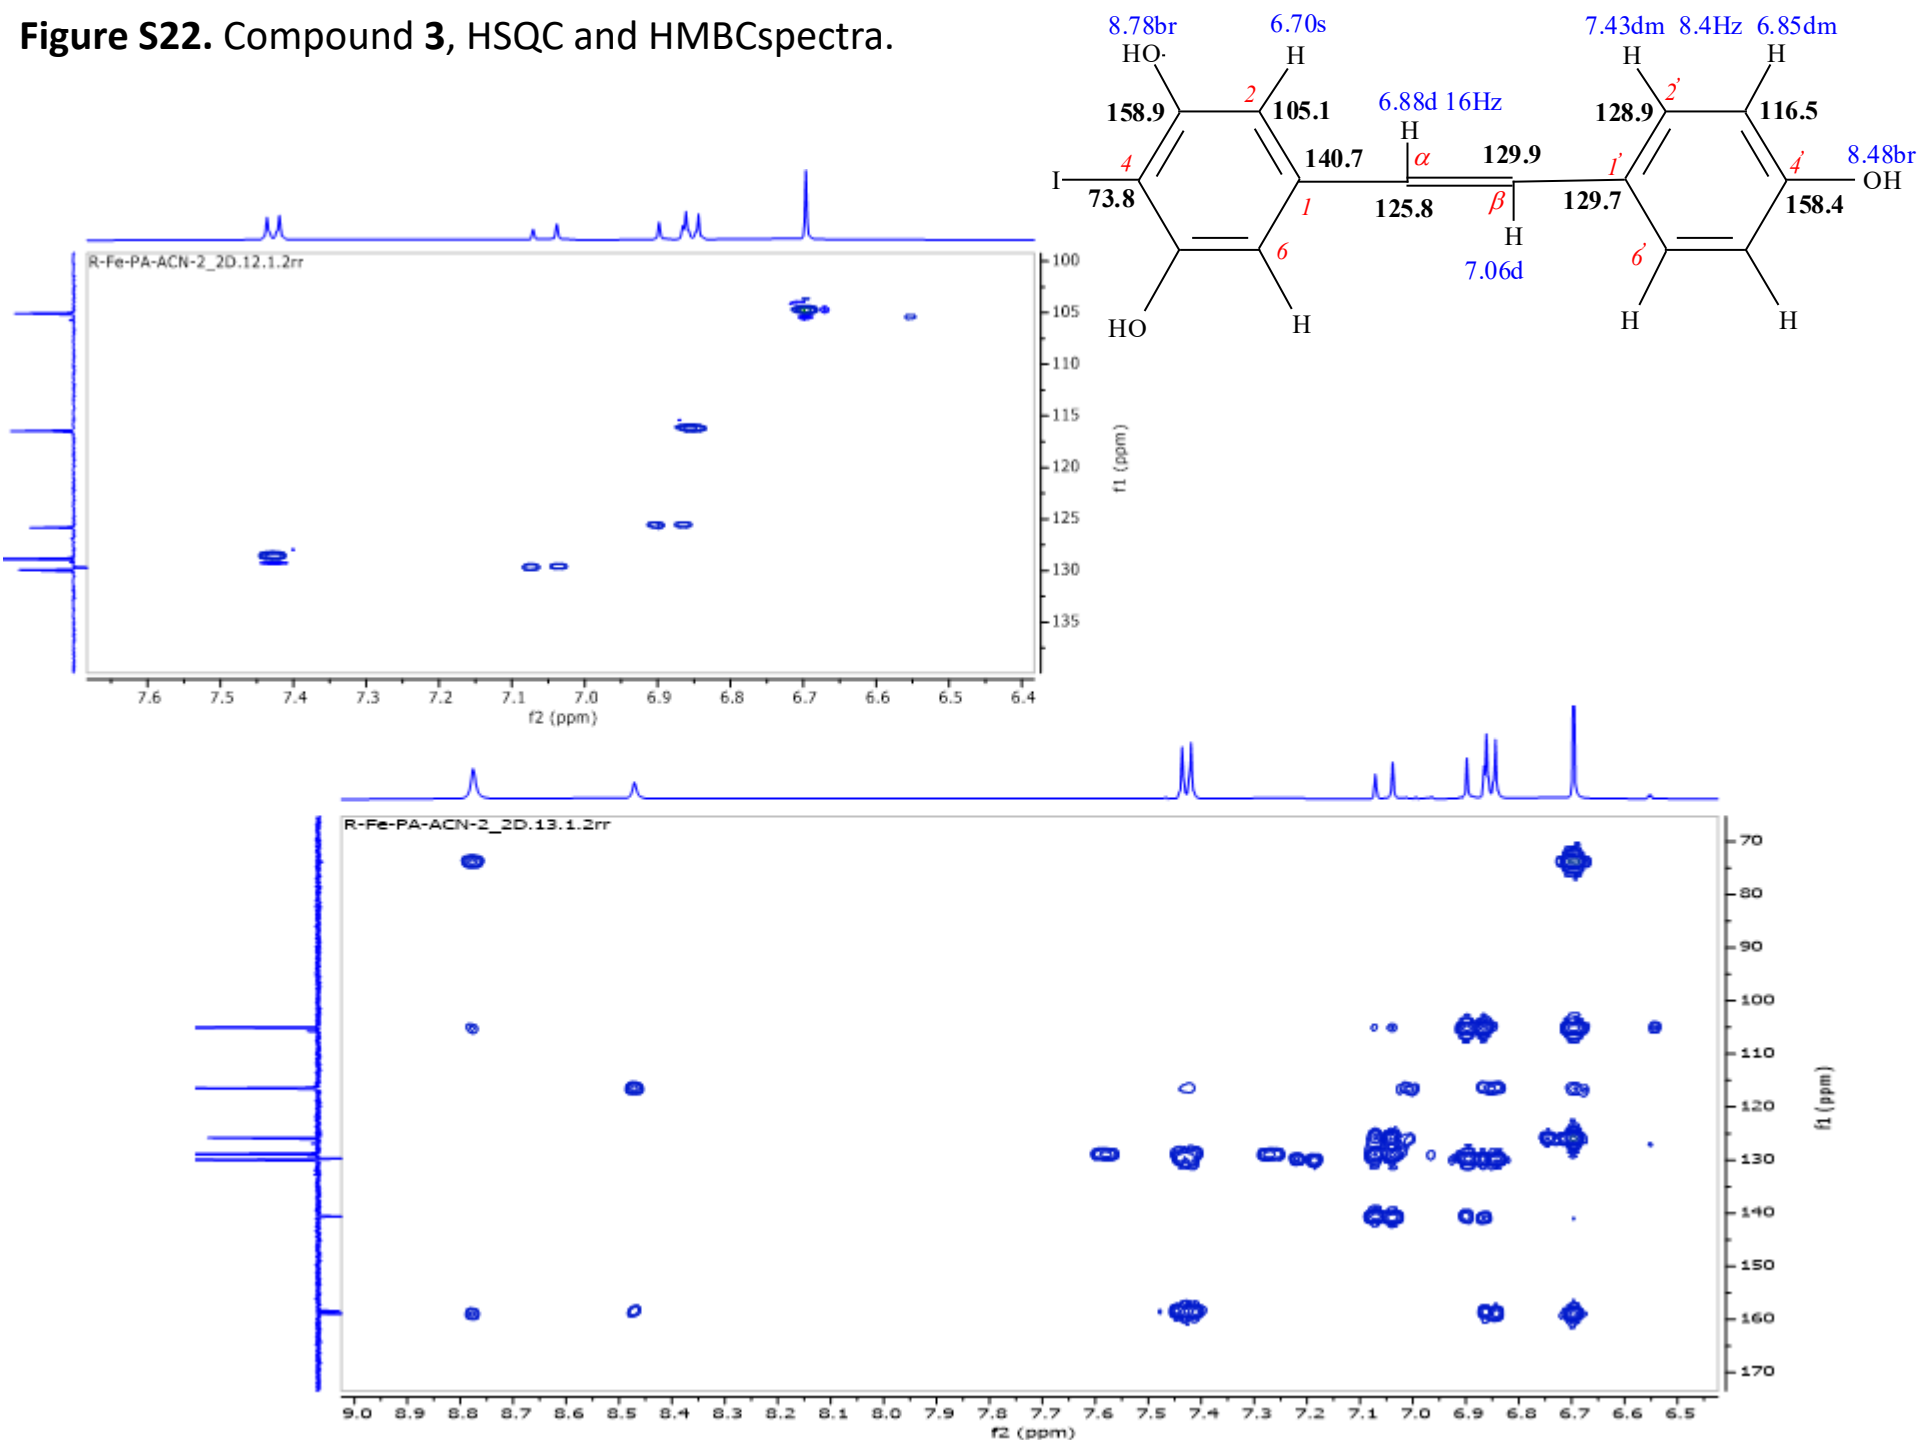

**Figure S23.** Compound **3**, COSY spectrum.

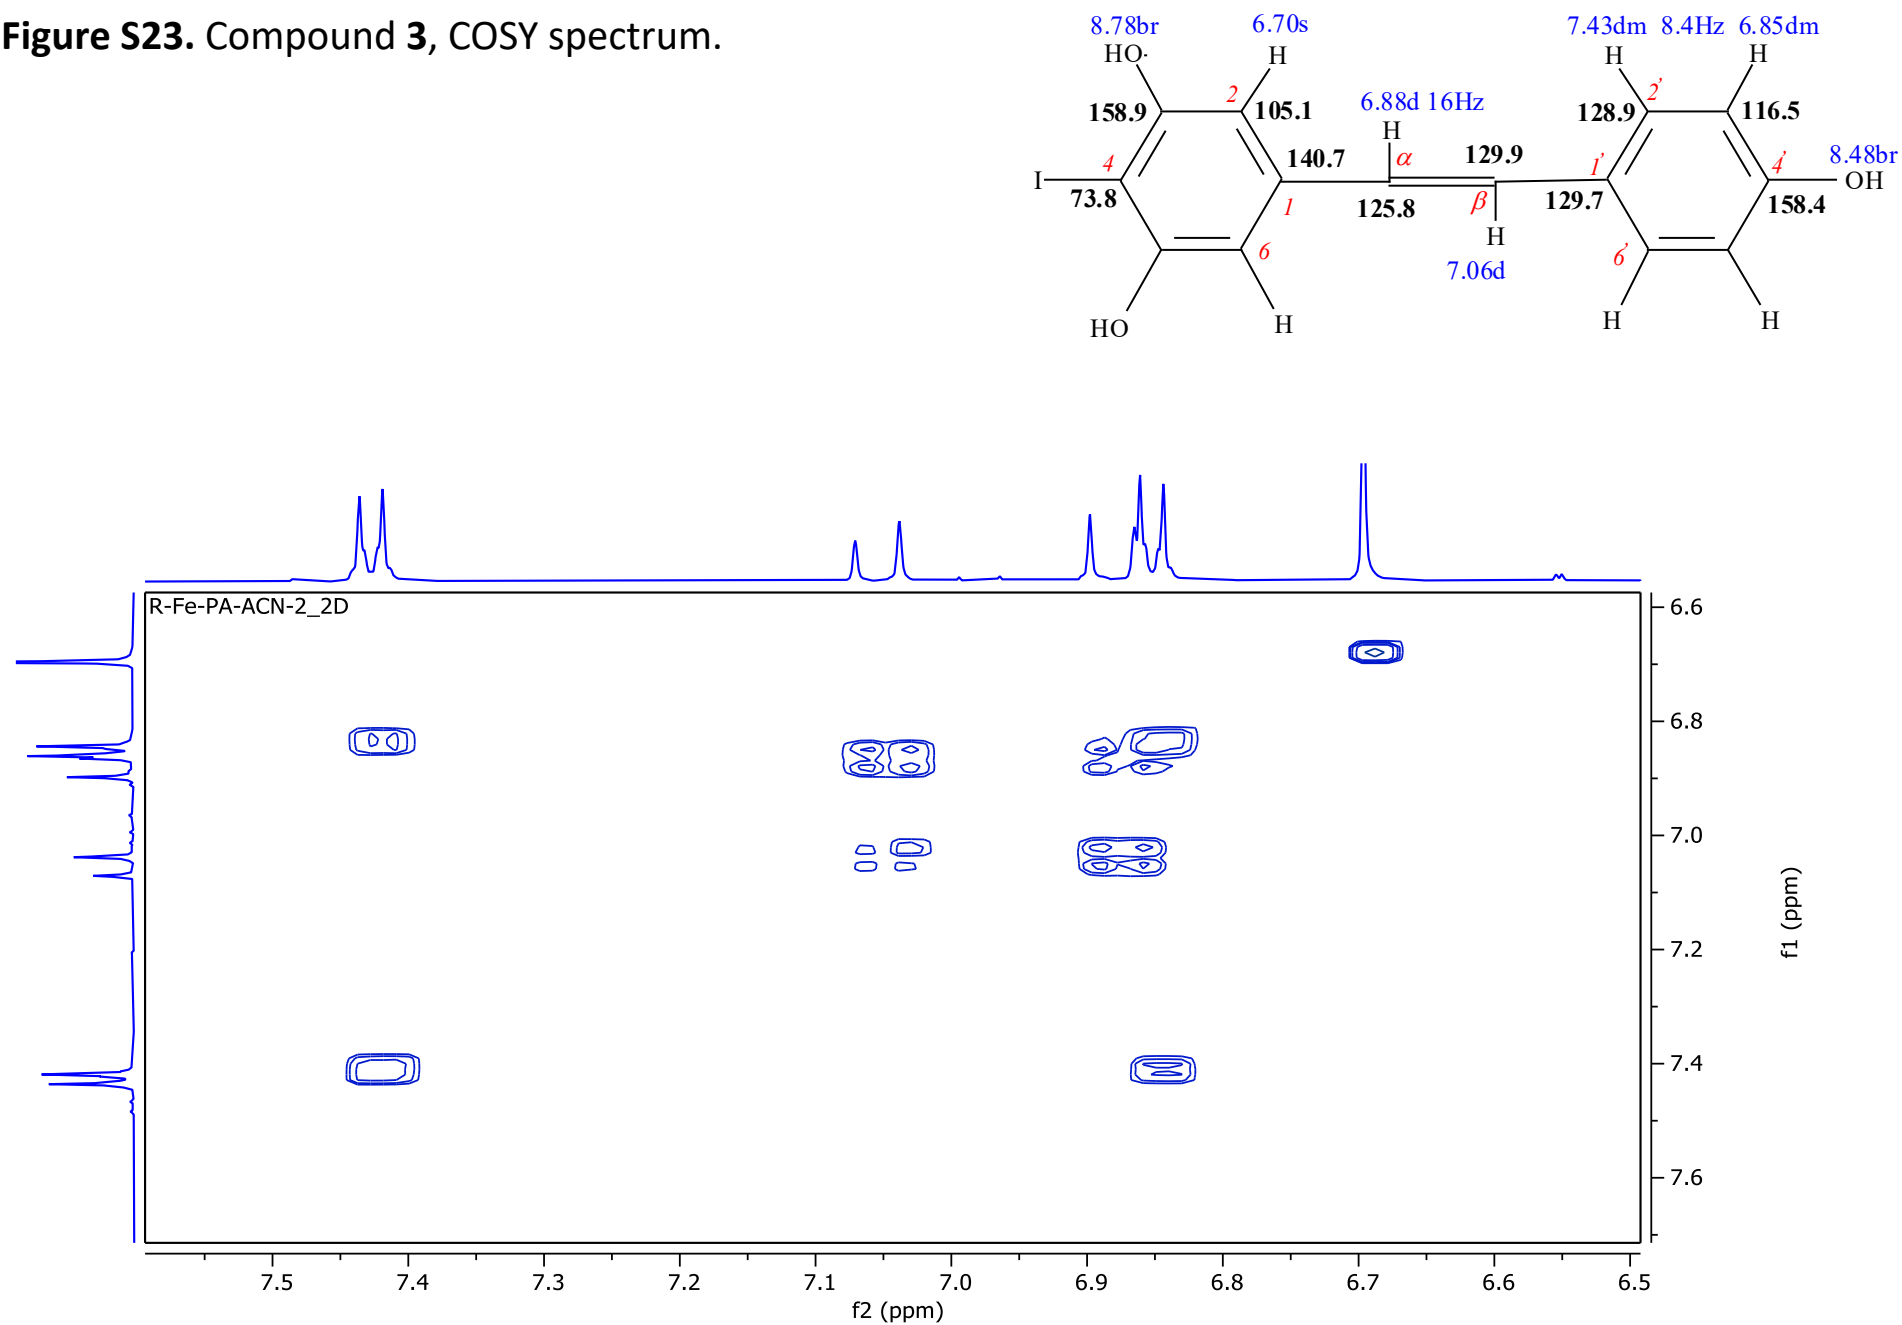

**Figure S24.** Compound **4**, <sup>1</sup>H NMR spectrum.

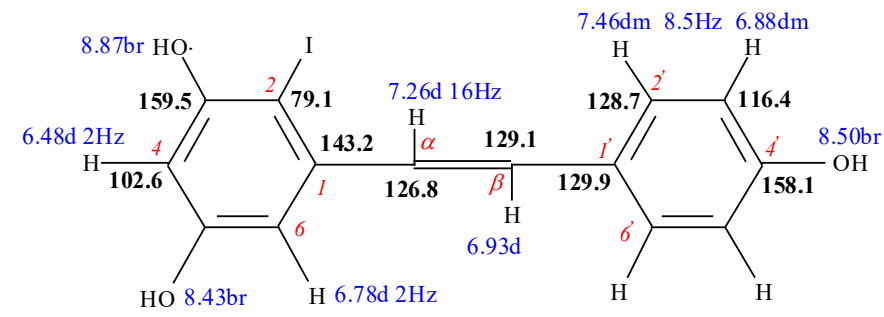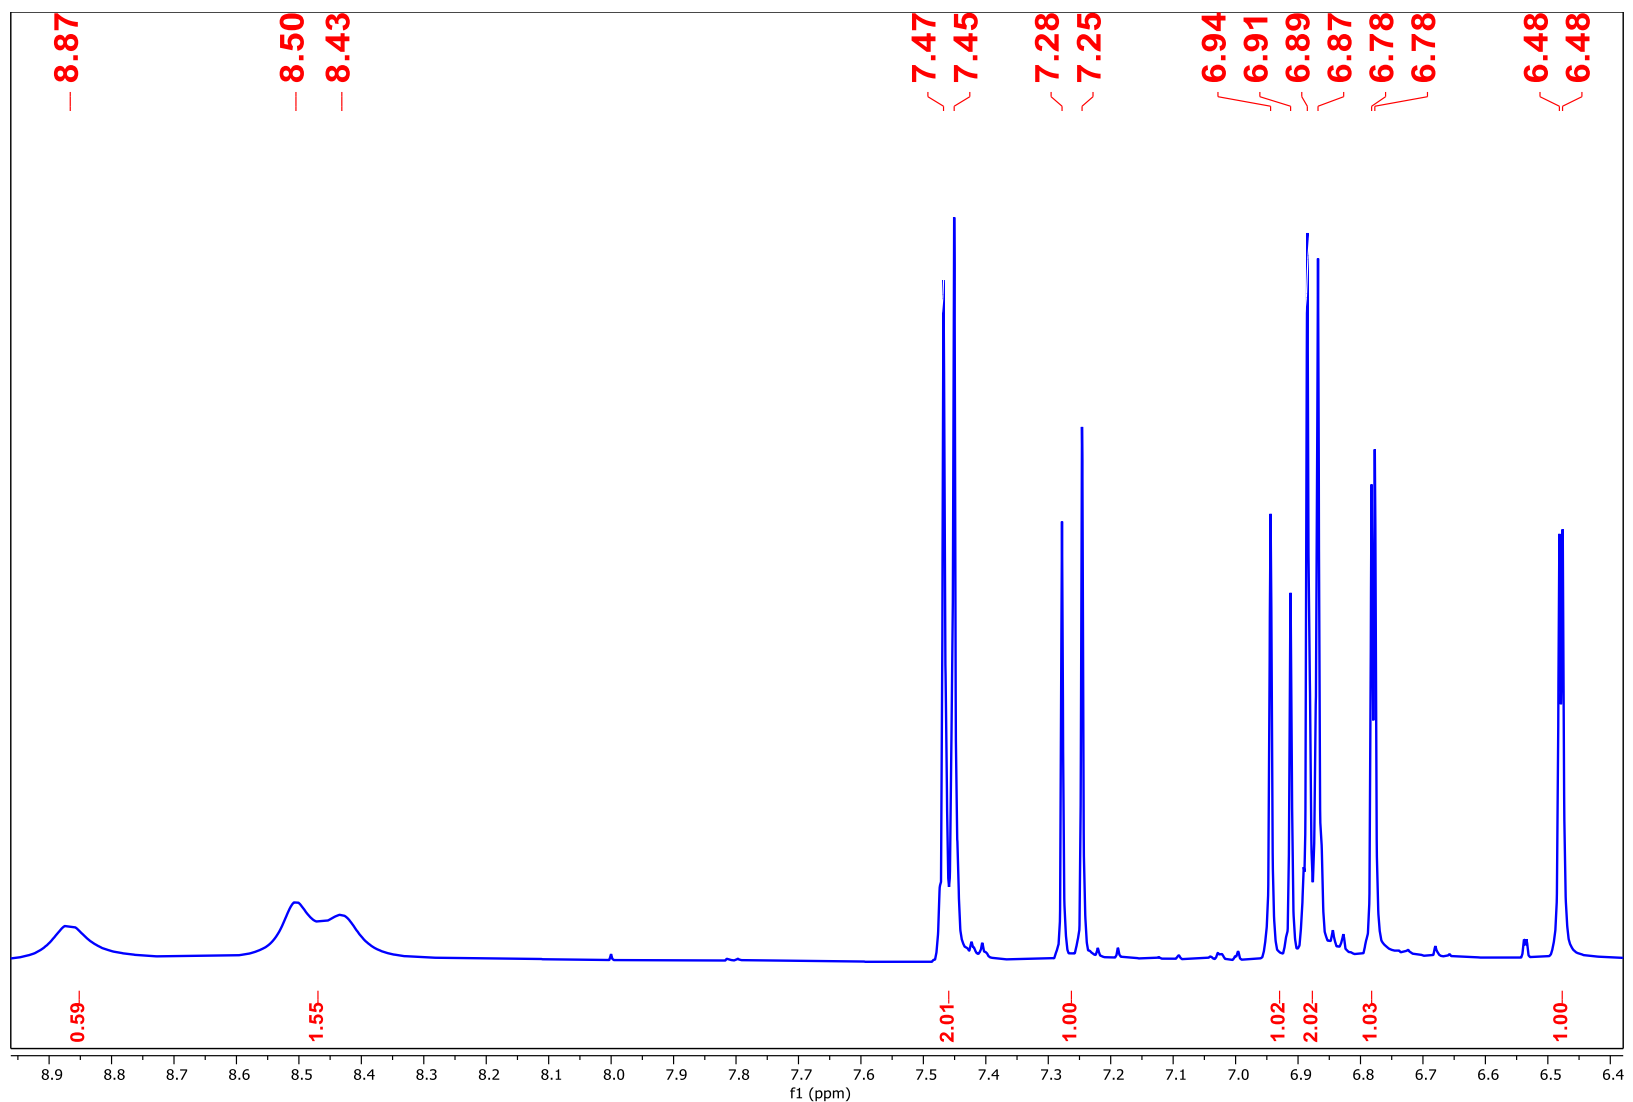

**Figure S25.** Compound **4**,  $^{13}\text{C}$ , APT NMR spectrum.

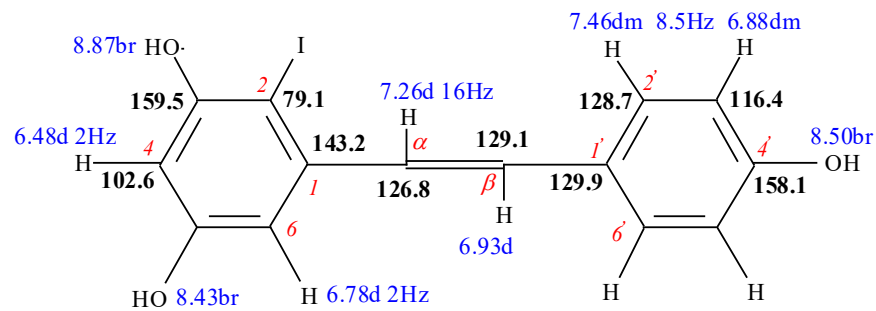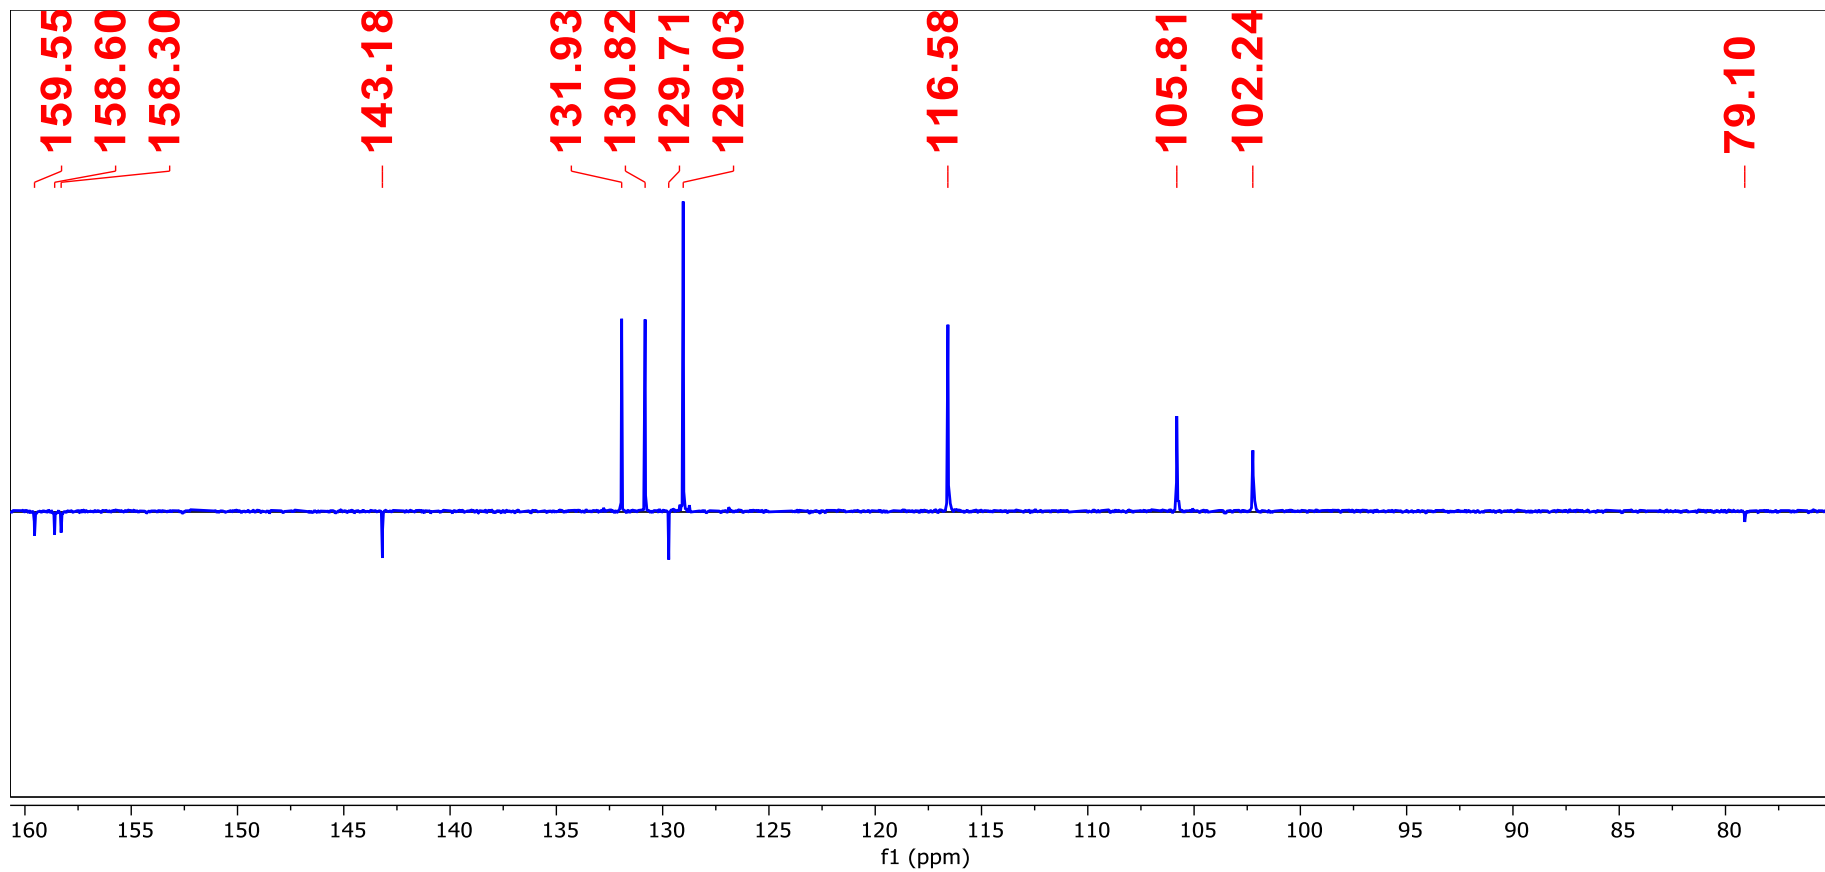

**Figure S26.** Compound **4**, HSQC and HMBC spectra.

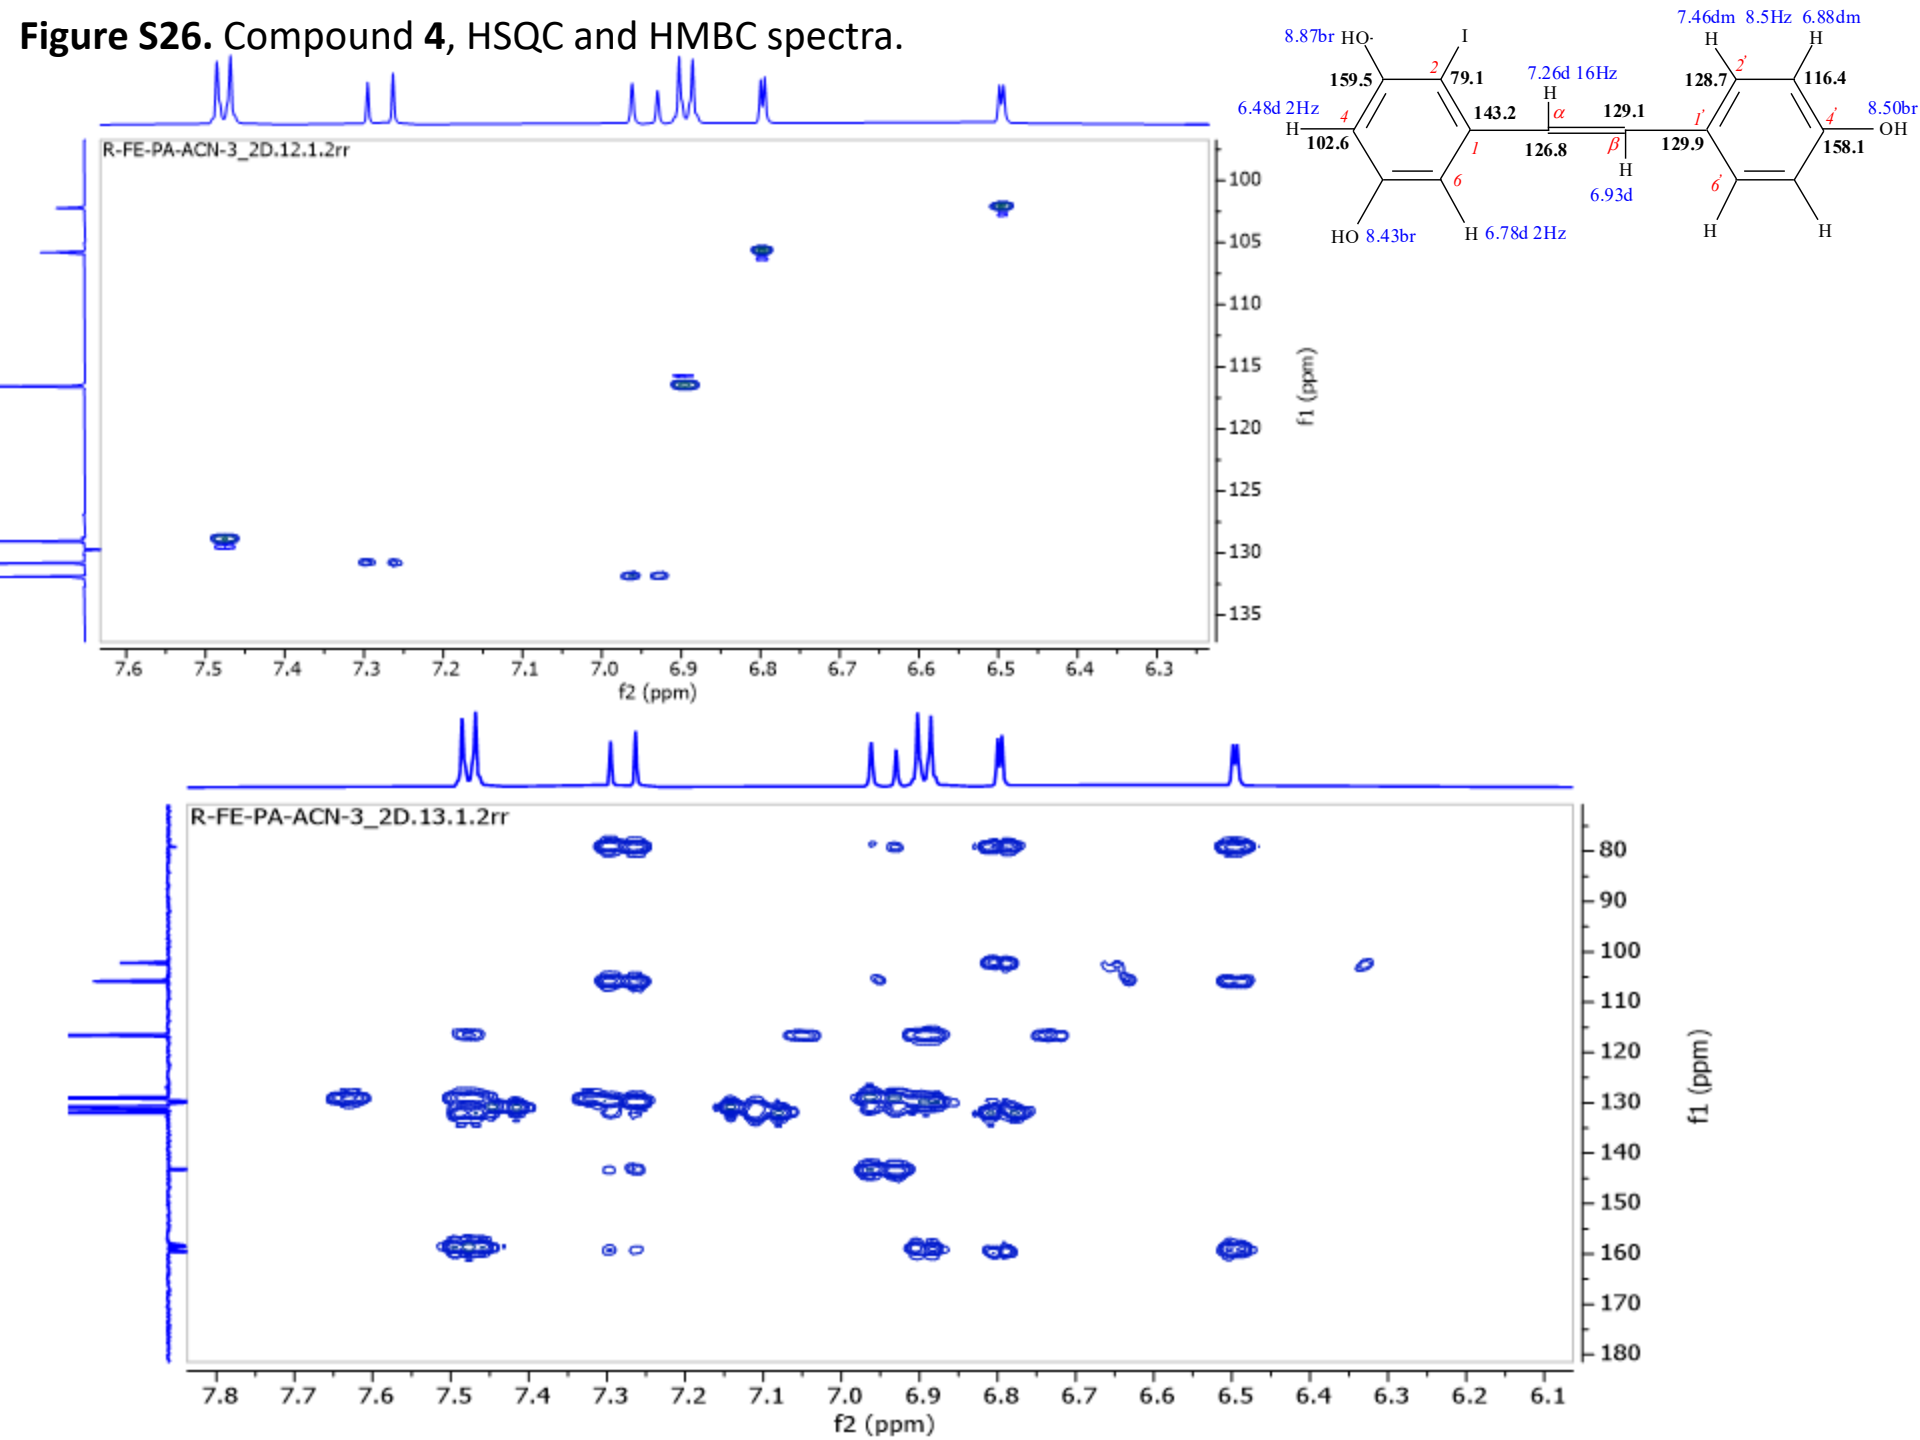

**Figure S27.** Compound **4**, COSY spectrum.

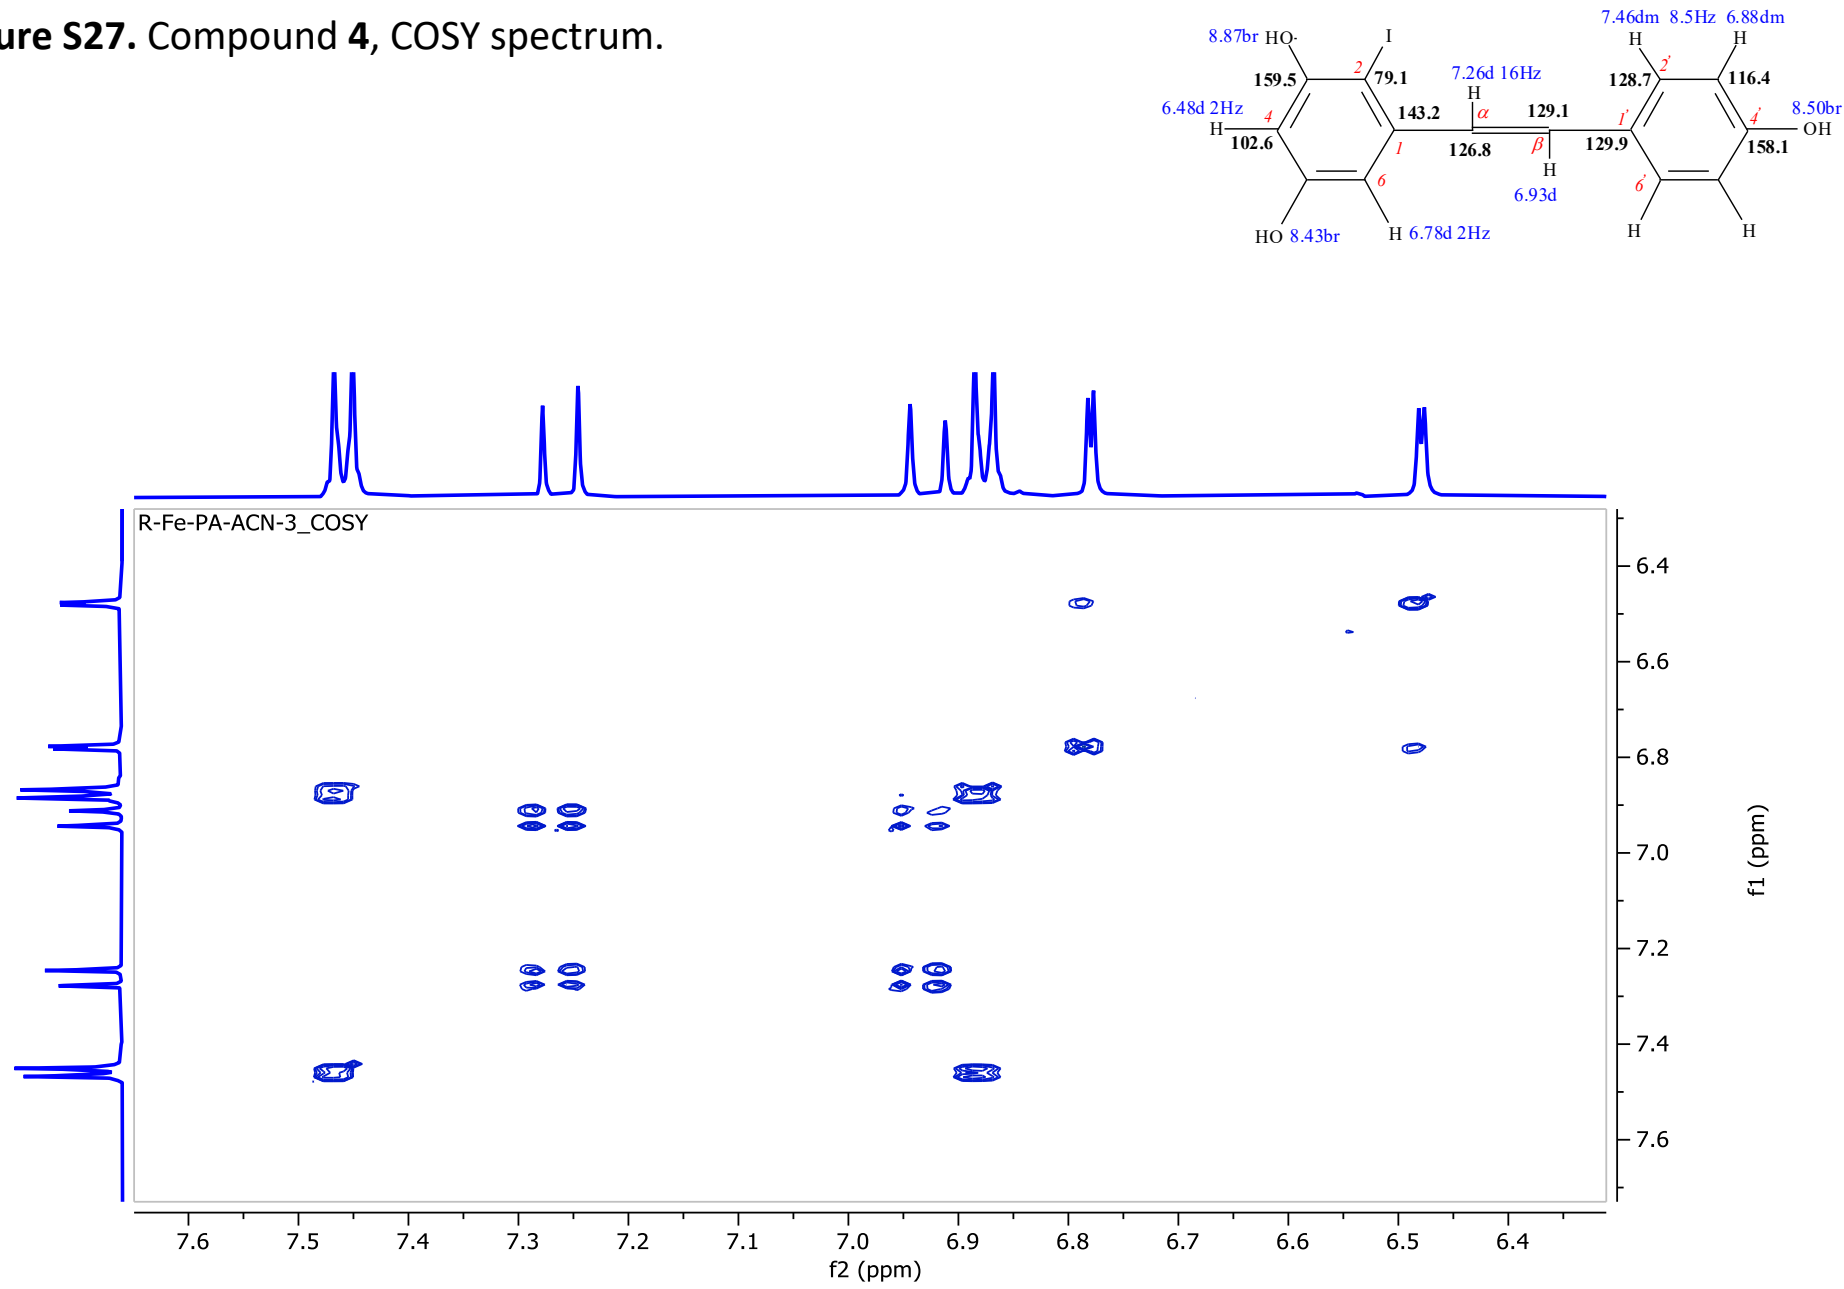

**Figure S28.** Compound **5**, <sup>1</sup>H NMR spectrum, and selROE on δ4.47 and δ5.45 ppm.

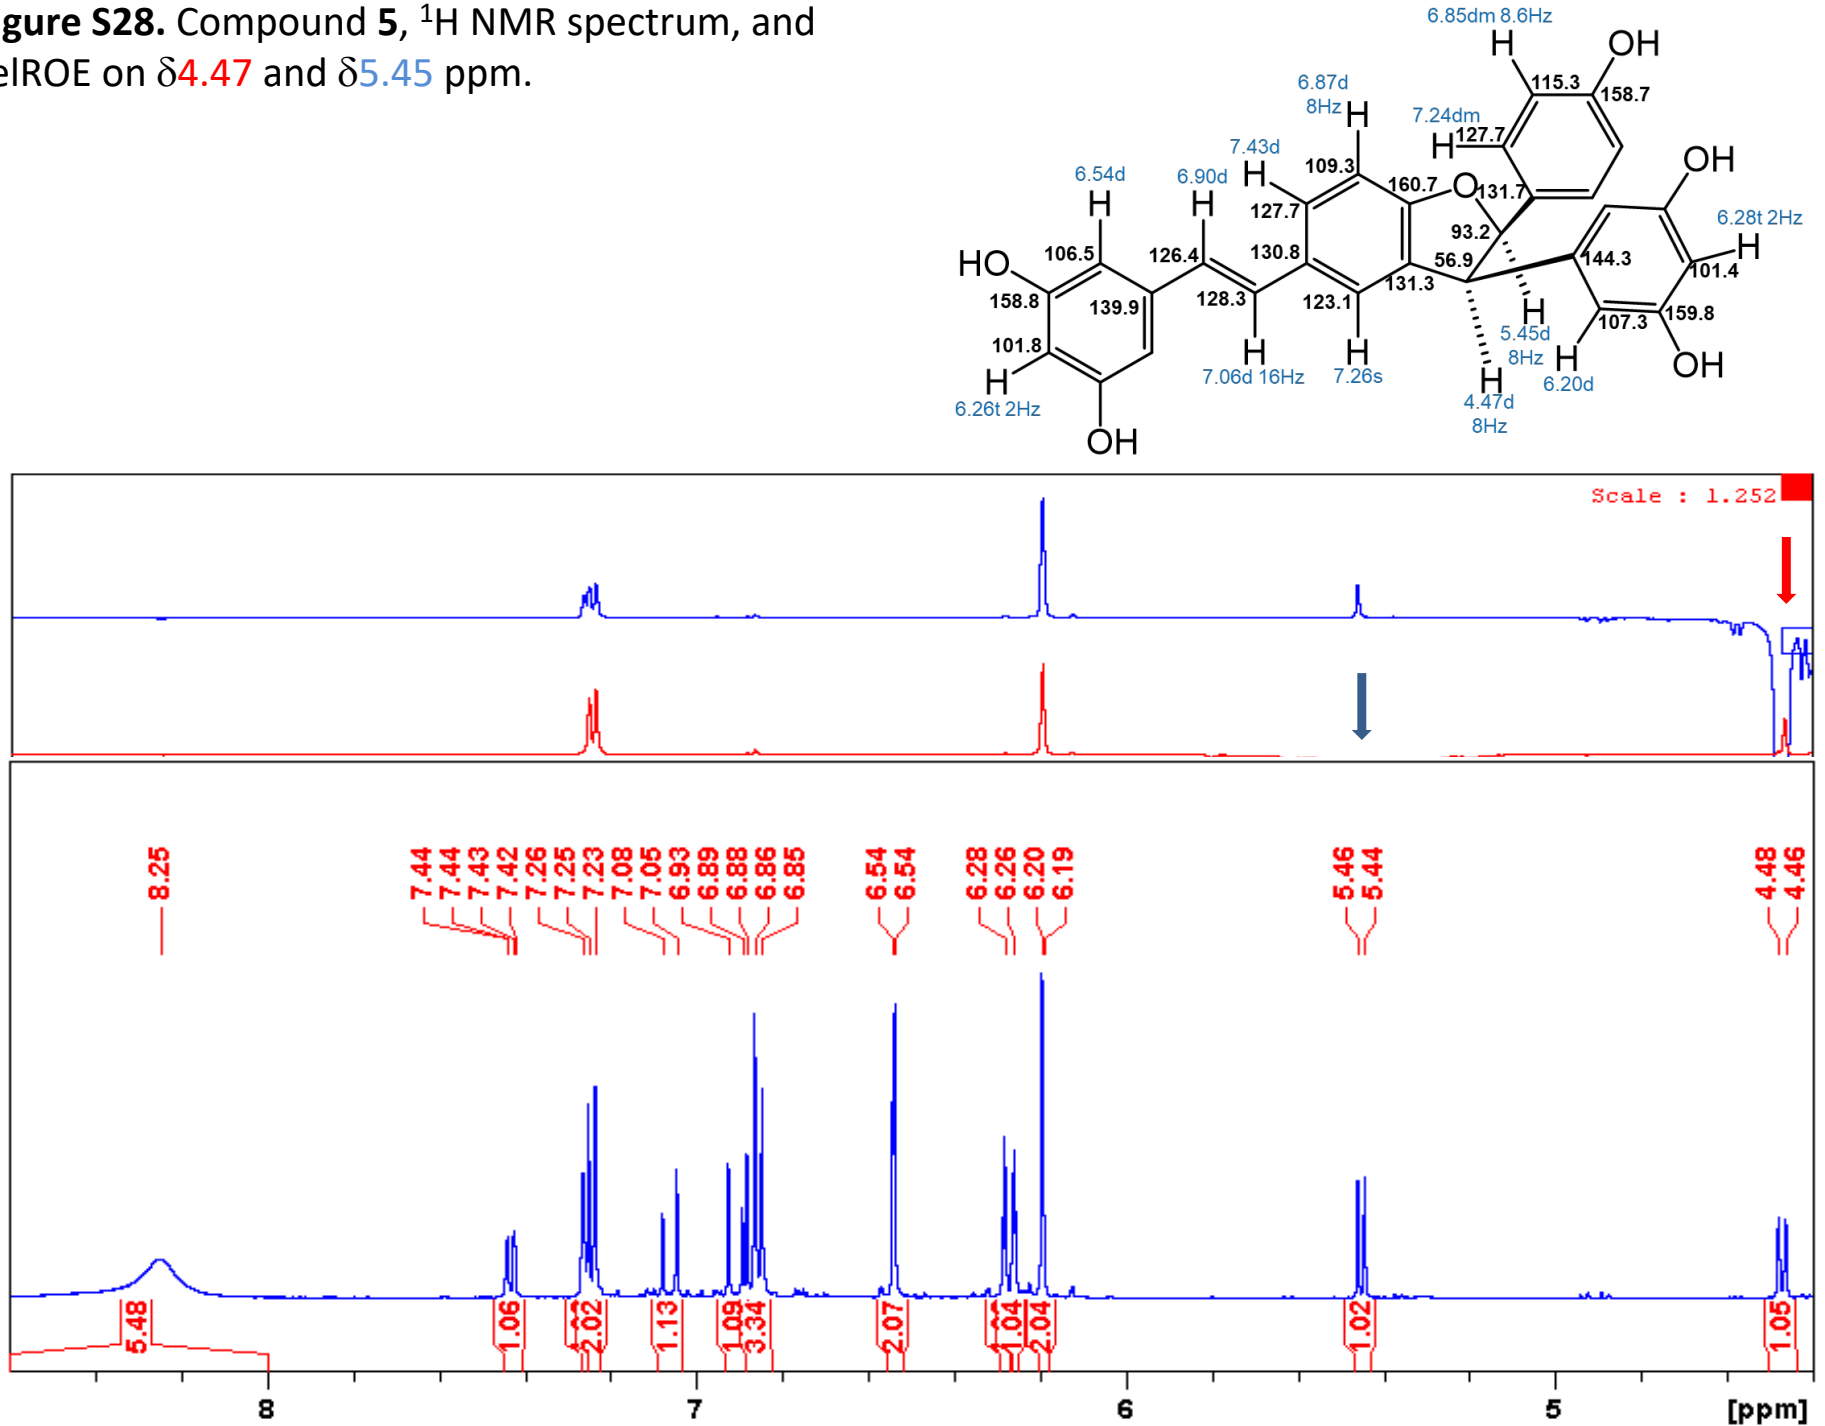

**Figure S29.** Compound **5**,  $^{13}\text{C}$ , APT NMR spectrum.

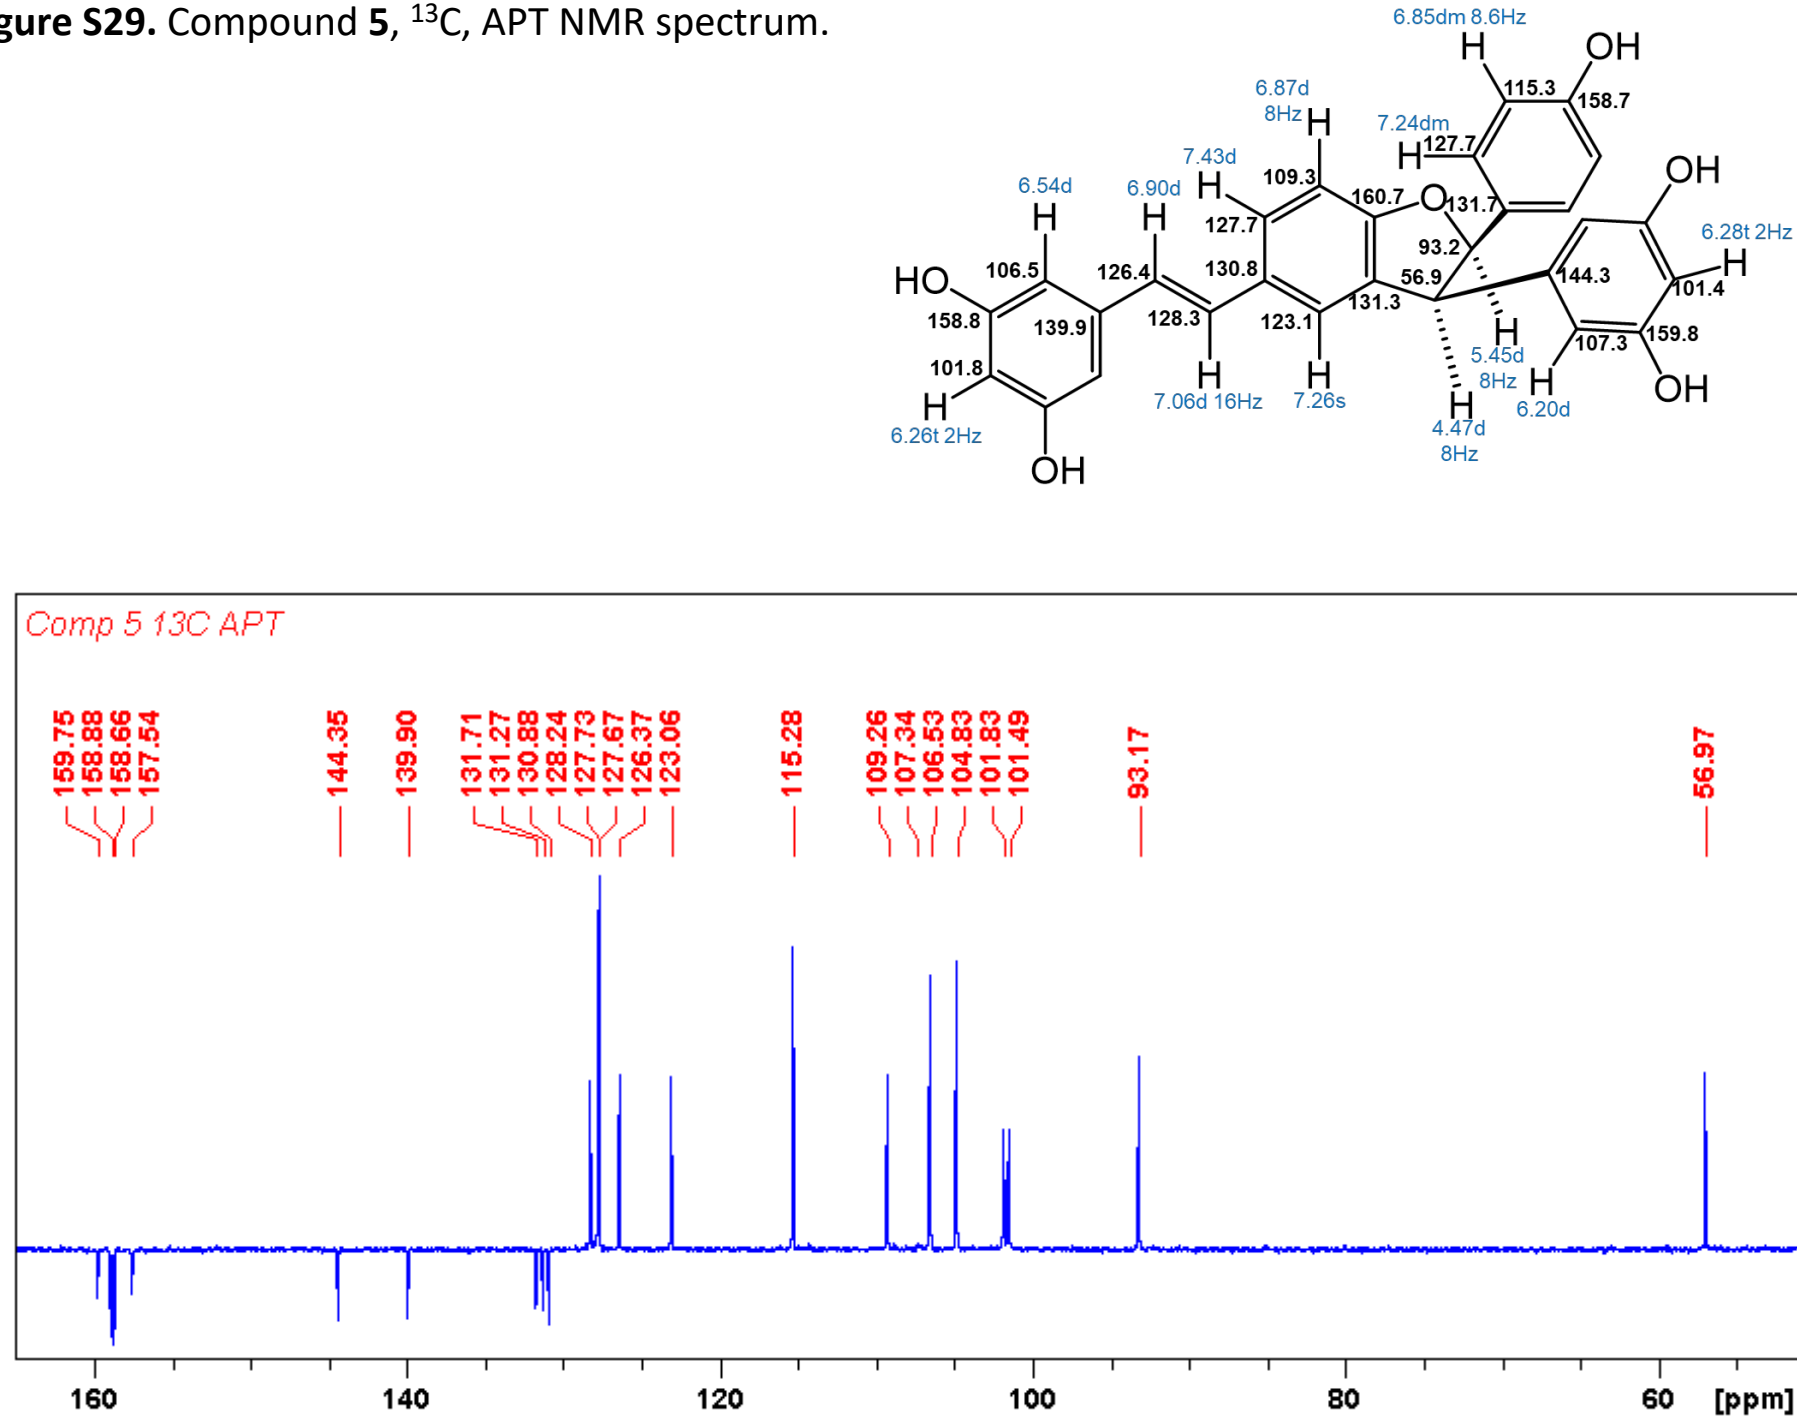



**Figure S30.** Compound **5**, HSQC spectrum and HSQC section.

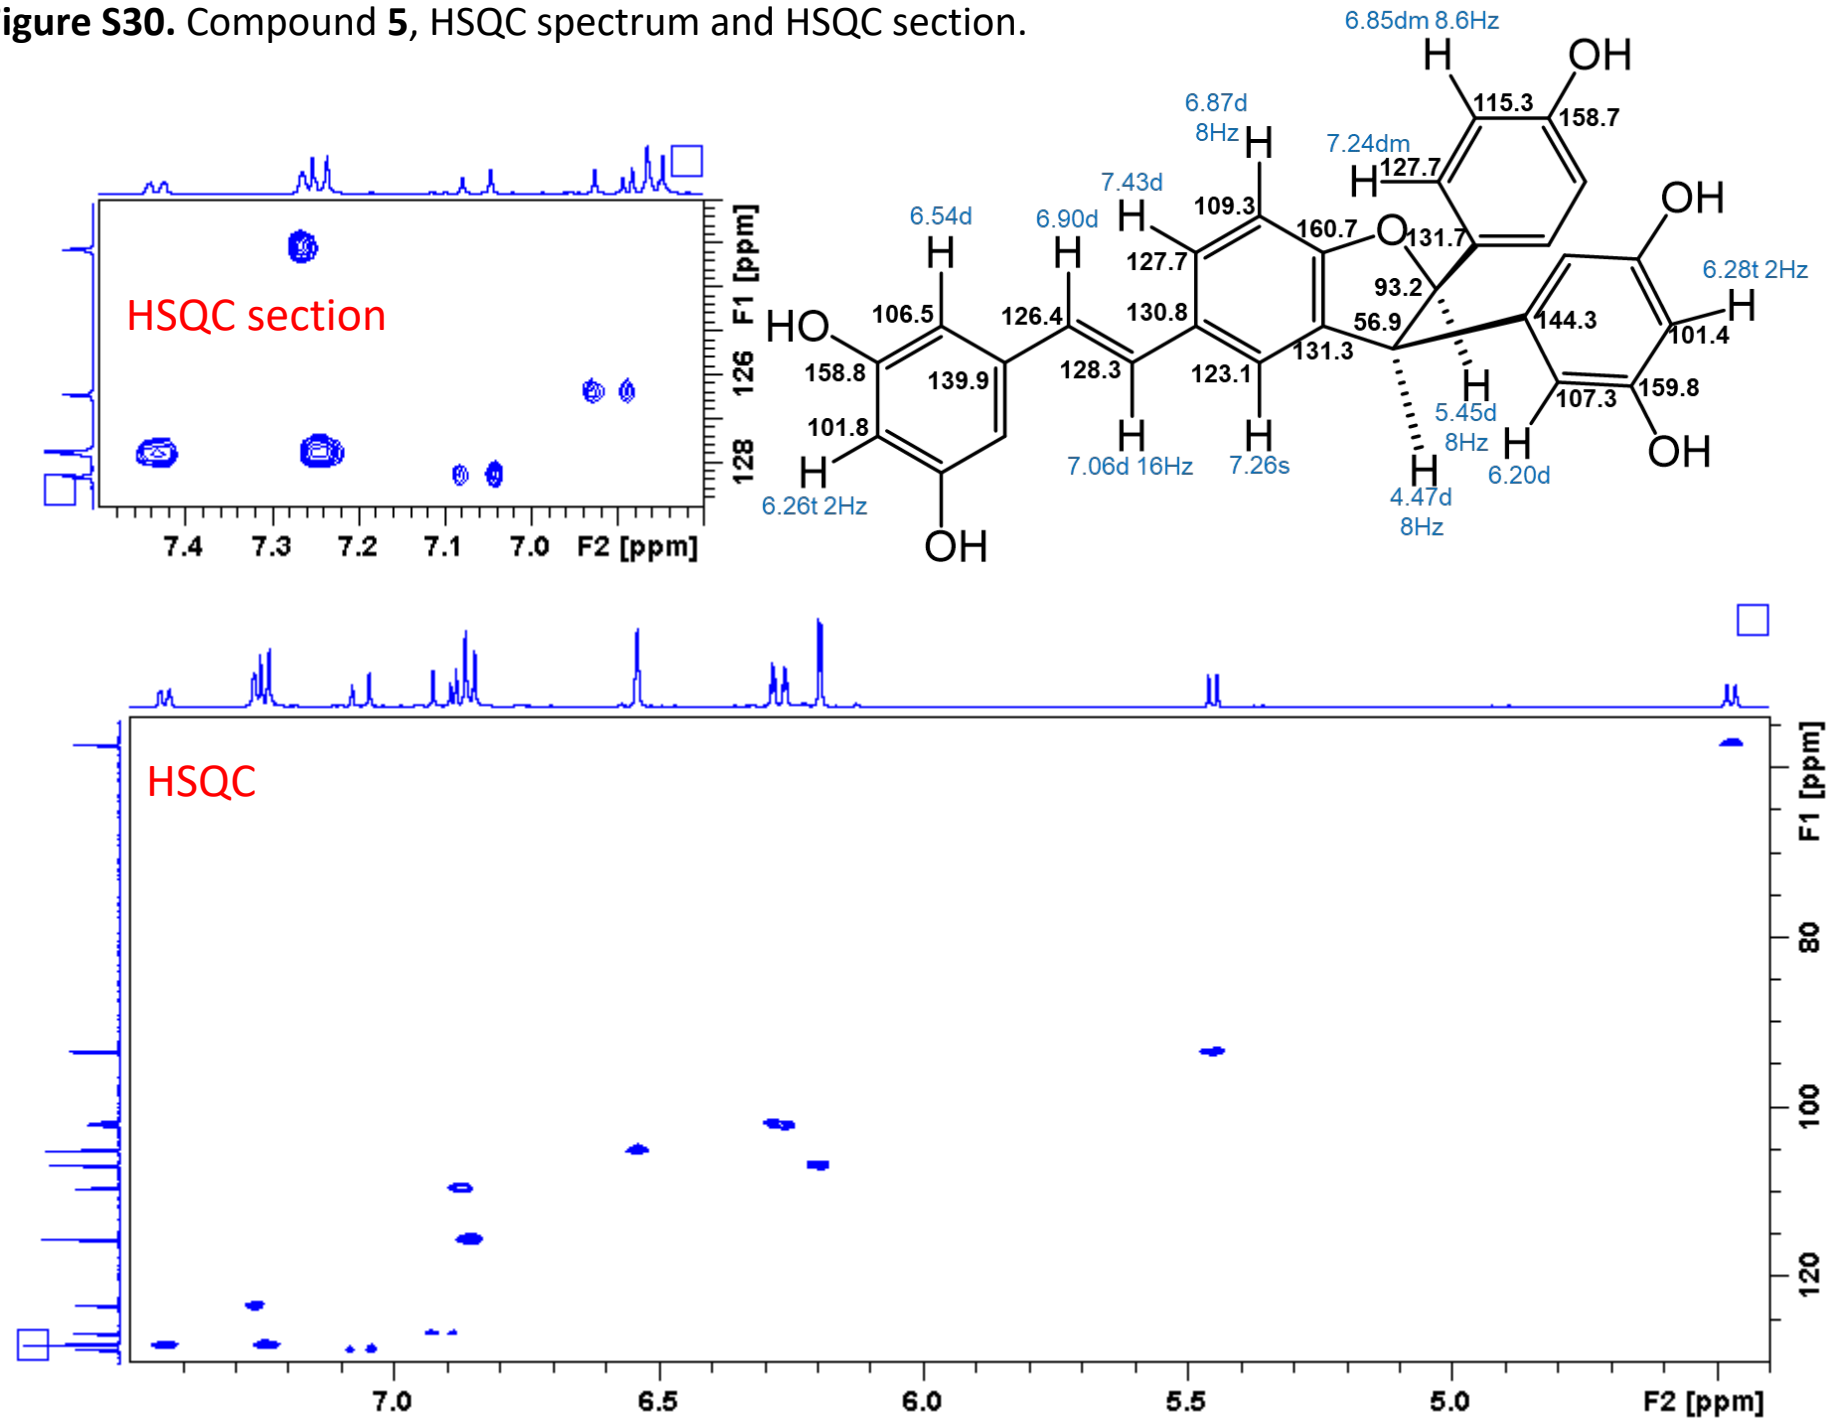

**Figure S31.** Compound **5**, COSY spectrum.

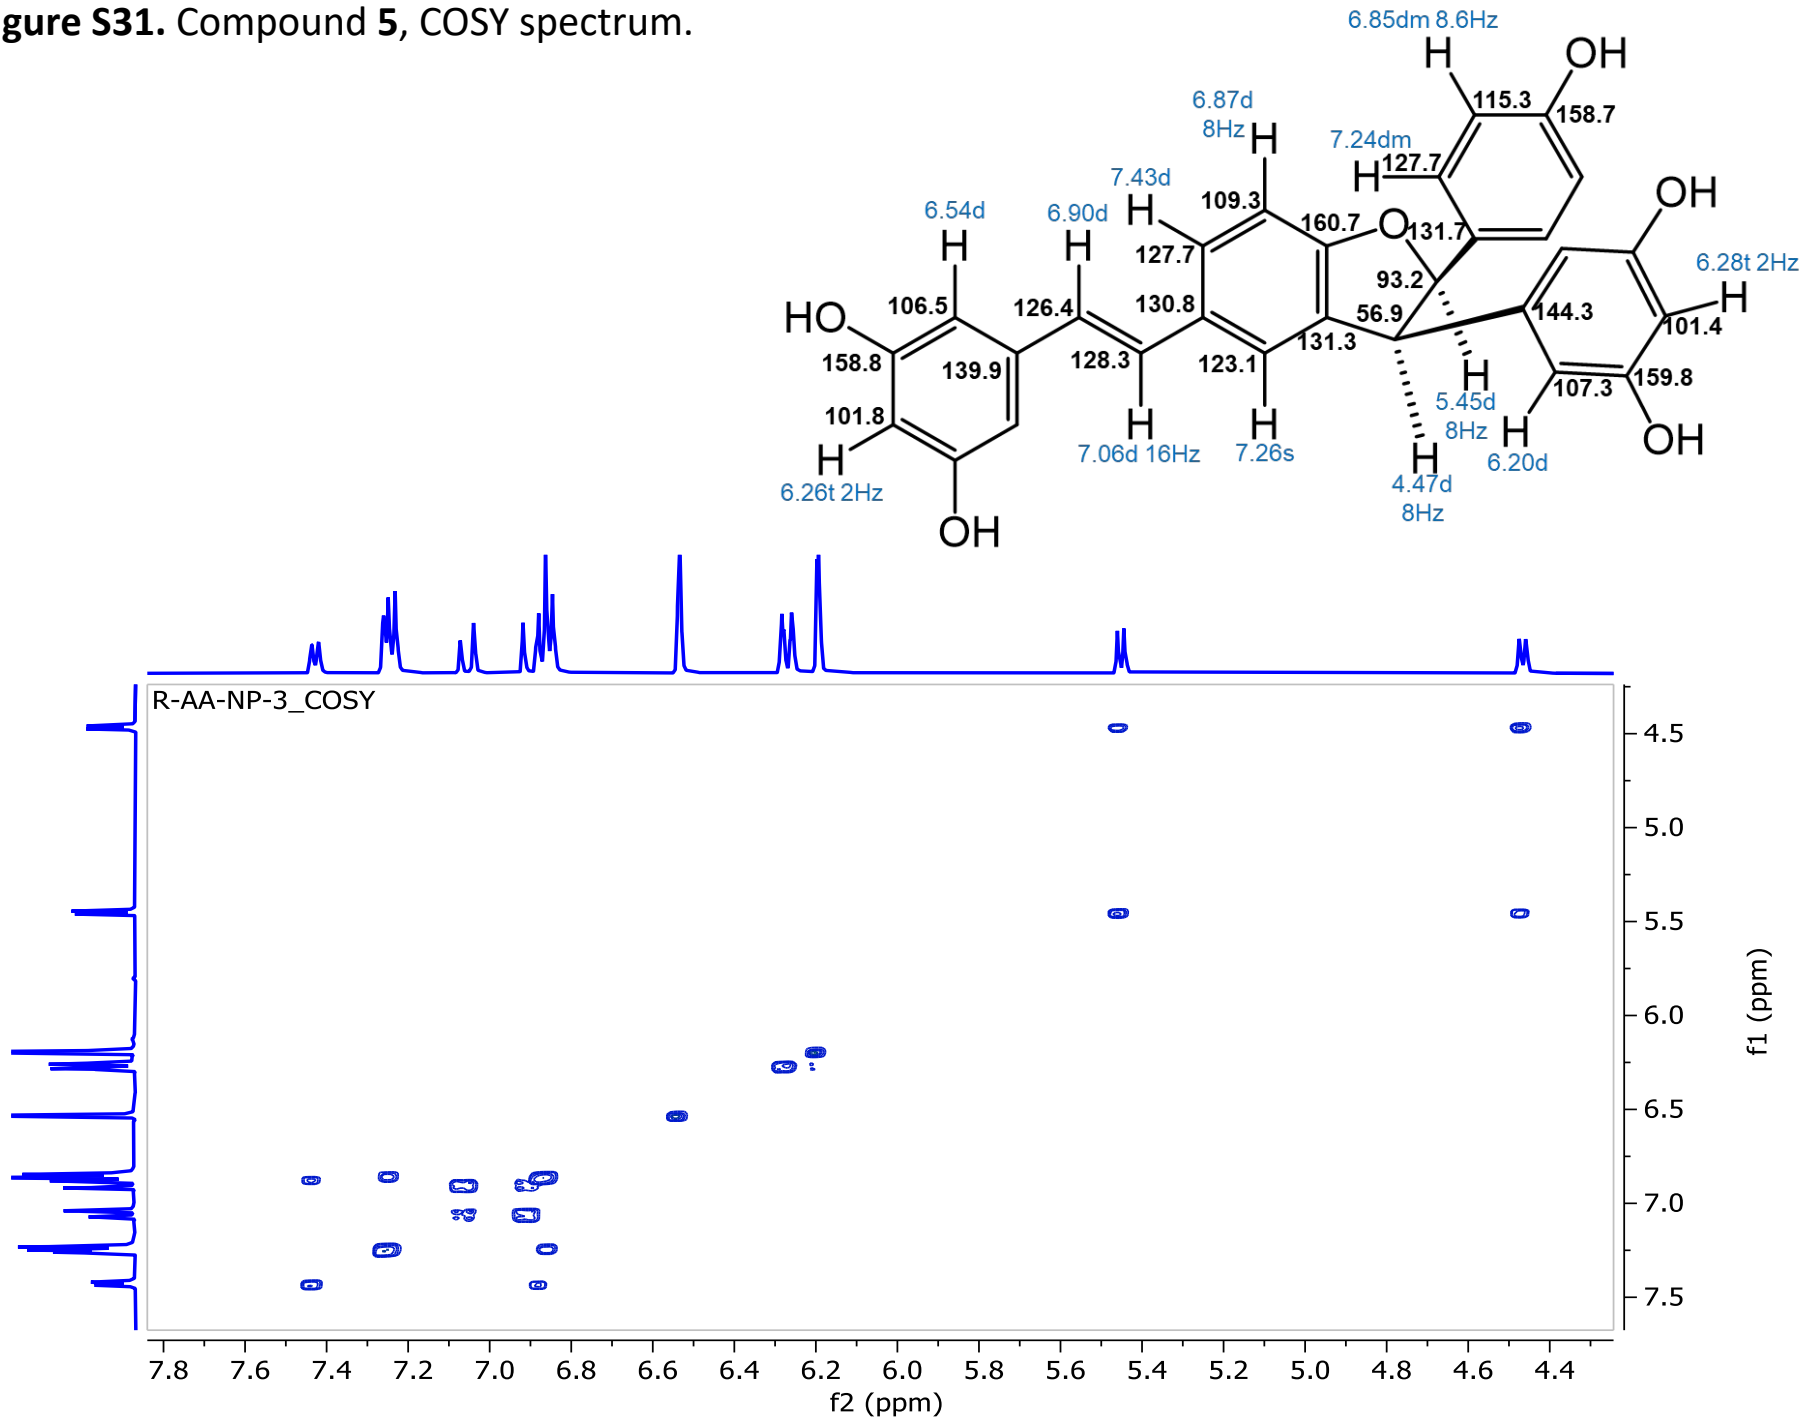

Figure S32. Compound 5, HMBC spectrum.

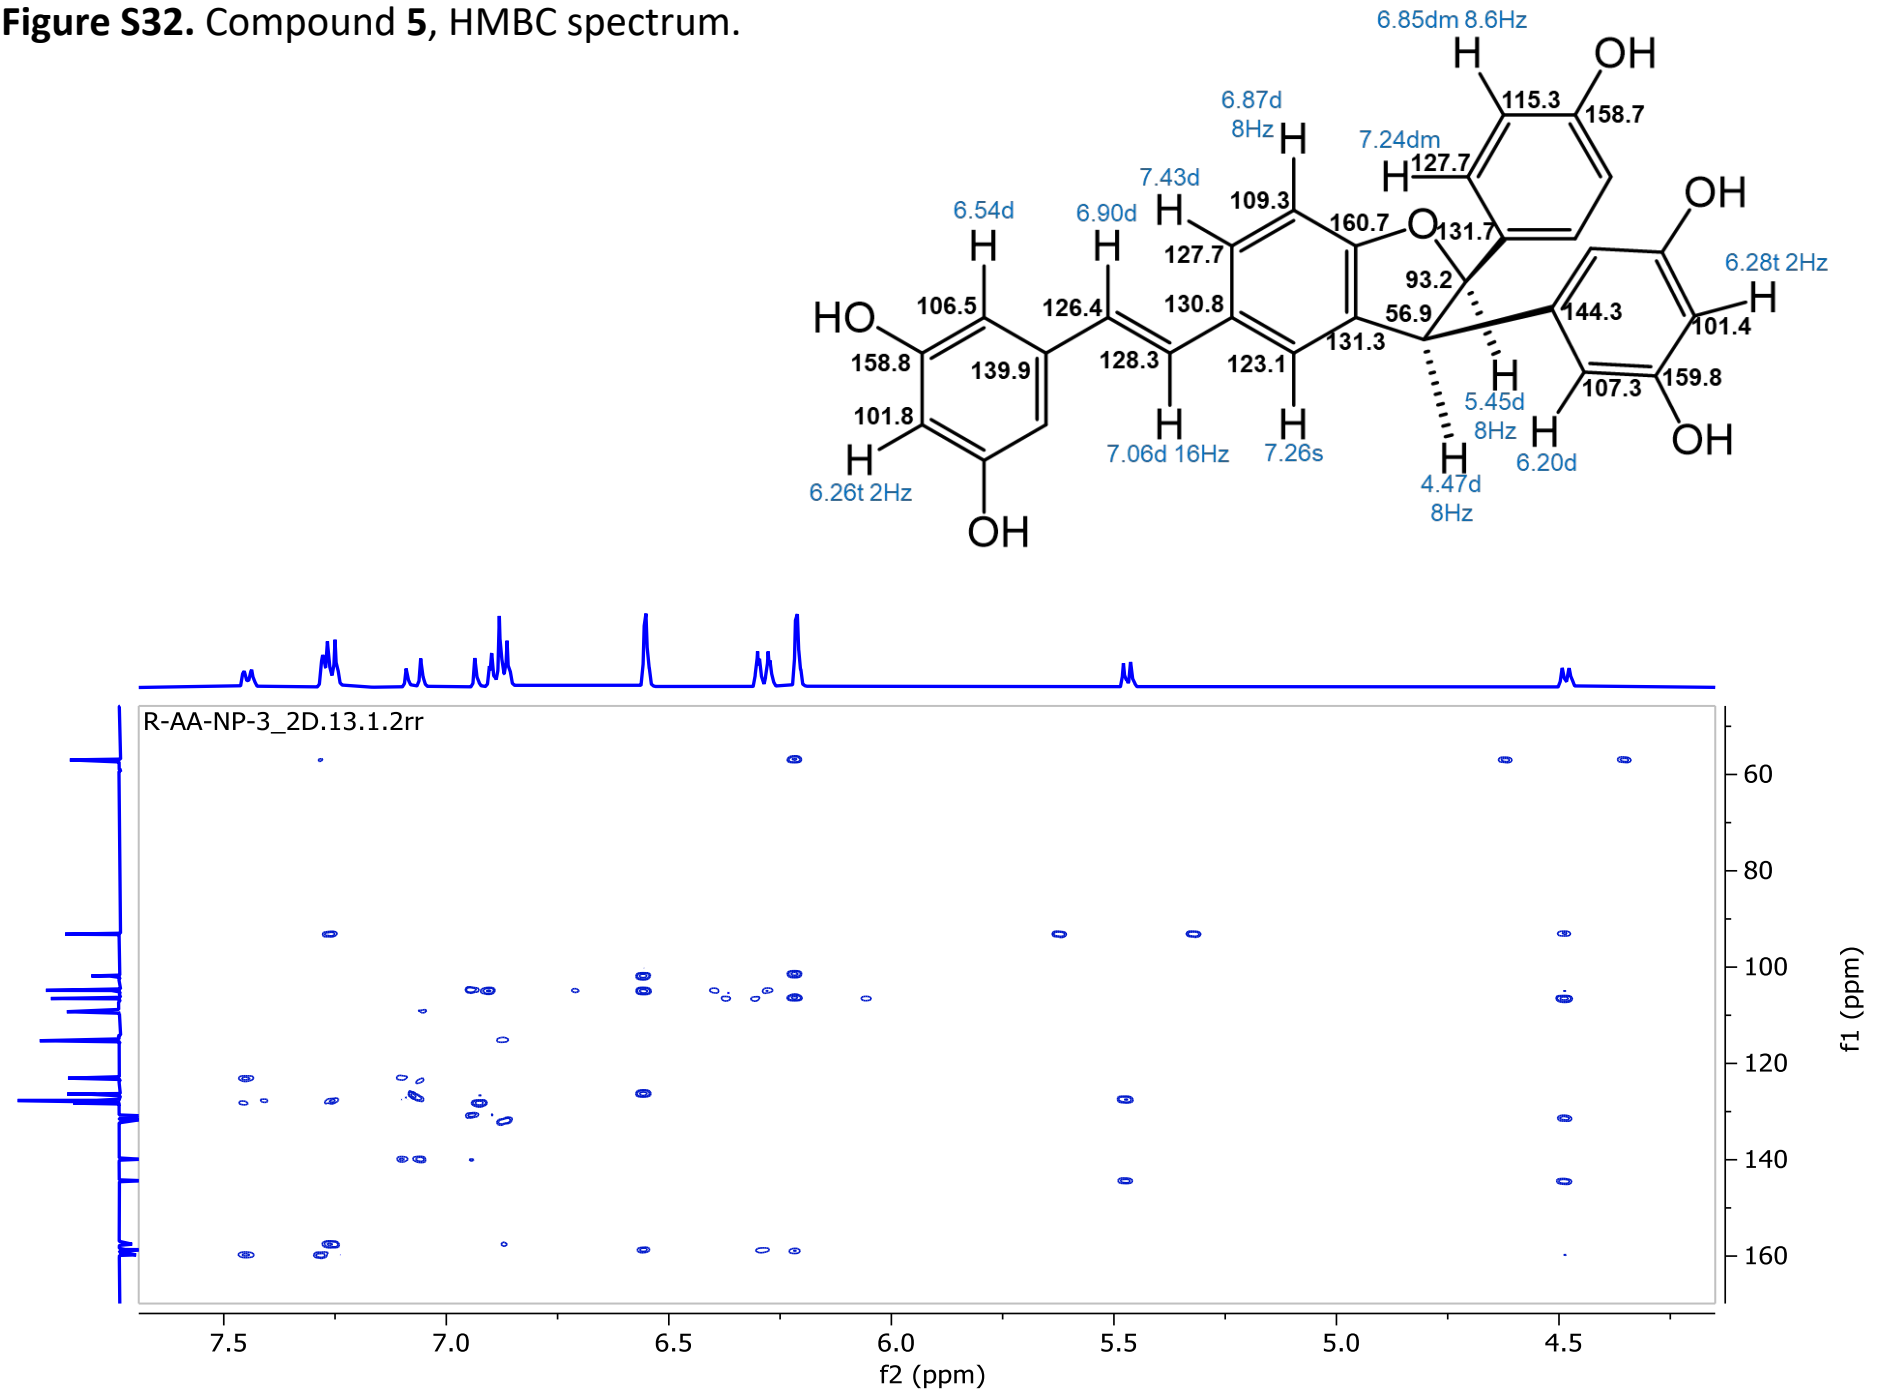

**Figure S33.** Compound **6**,  $^1\text{H}$ , selNOE on  $\delta$ 4.48 and  $\delta$ 5.42 ppm.

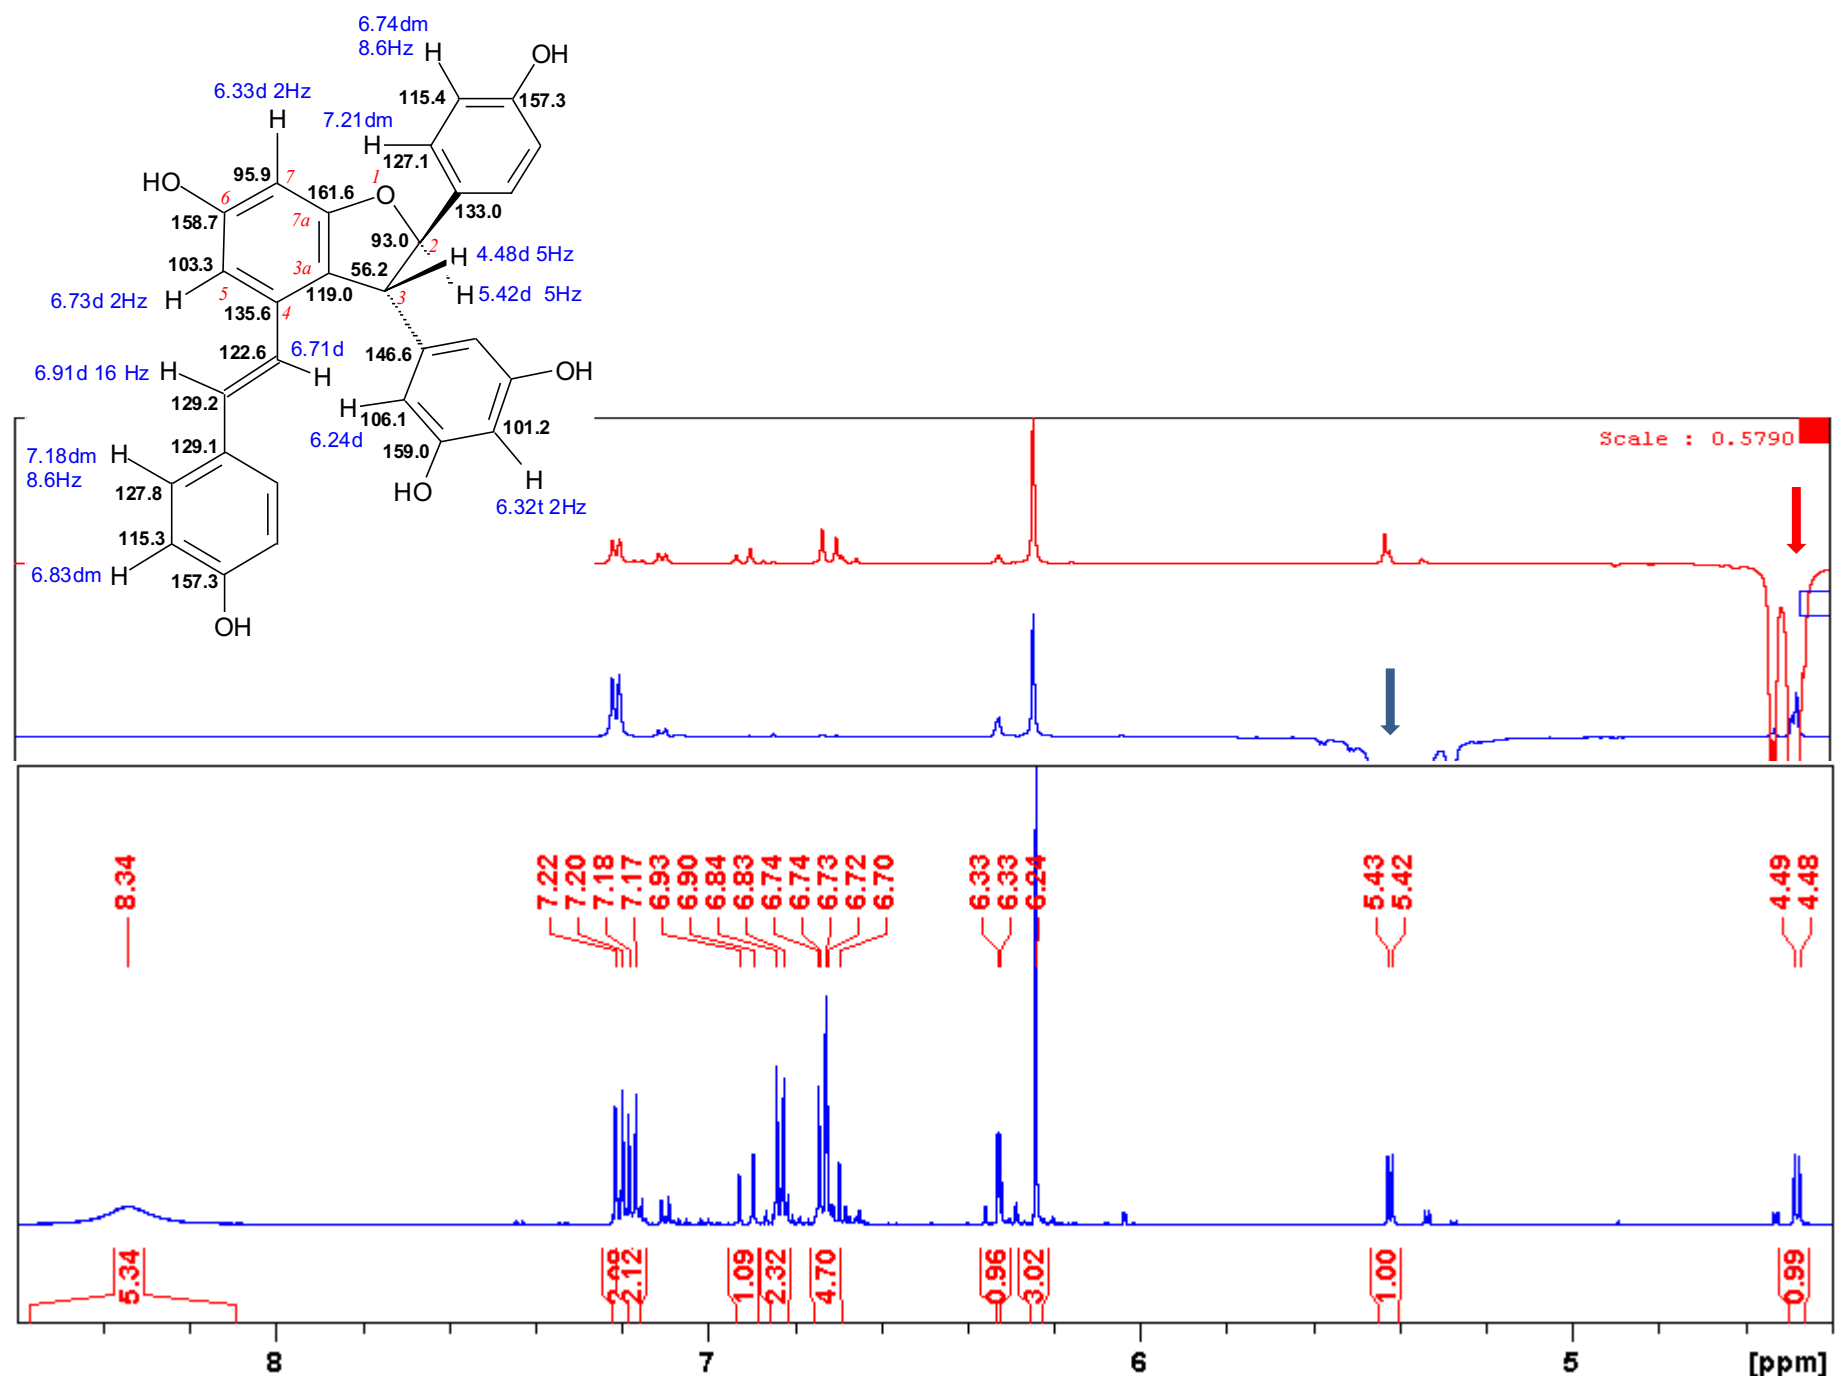

Figure S34. Compound 6, <sup>13</sup>C, APT NMR spectrum.

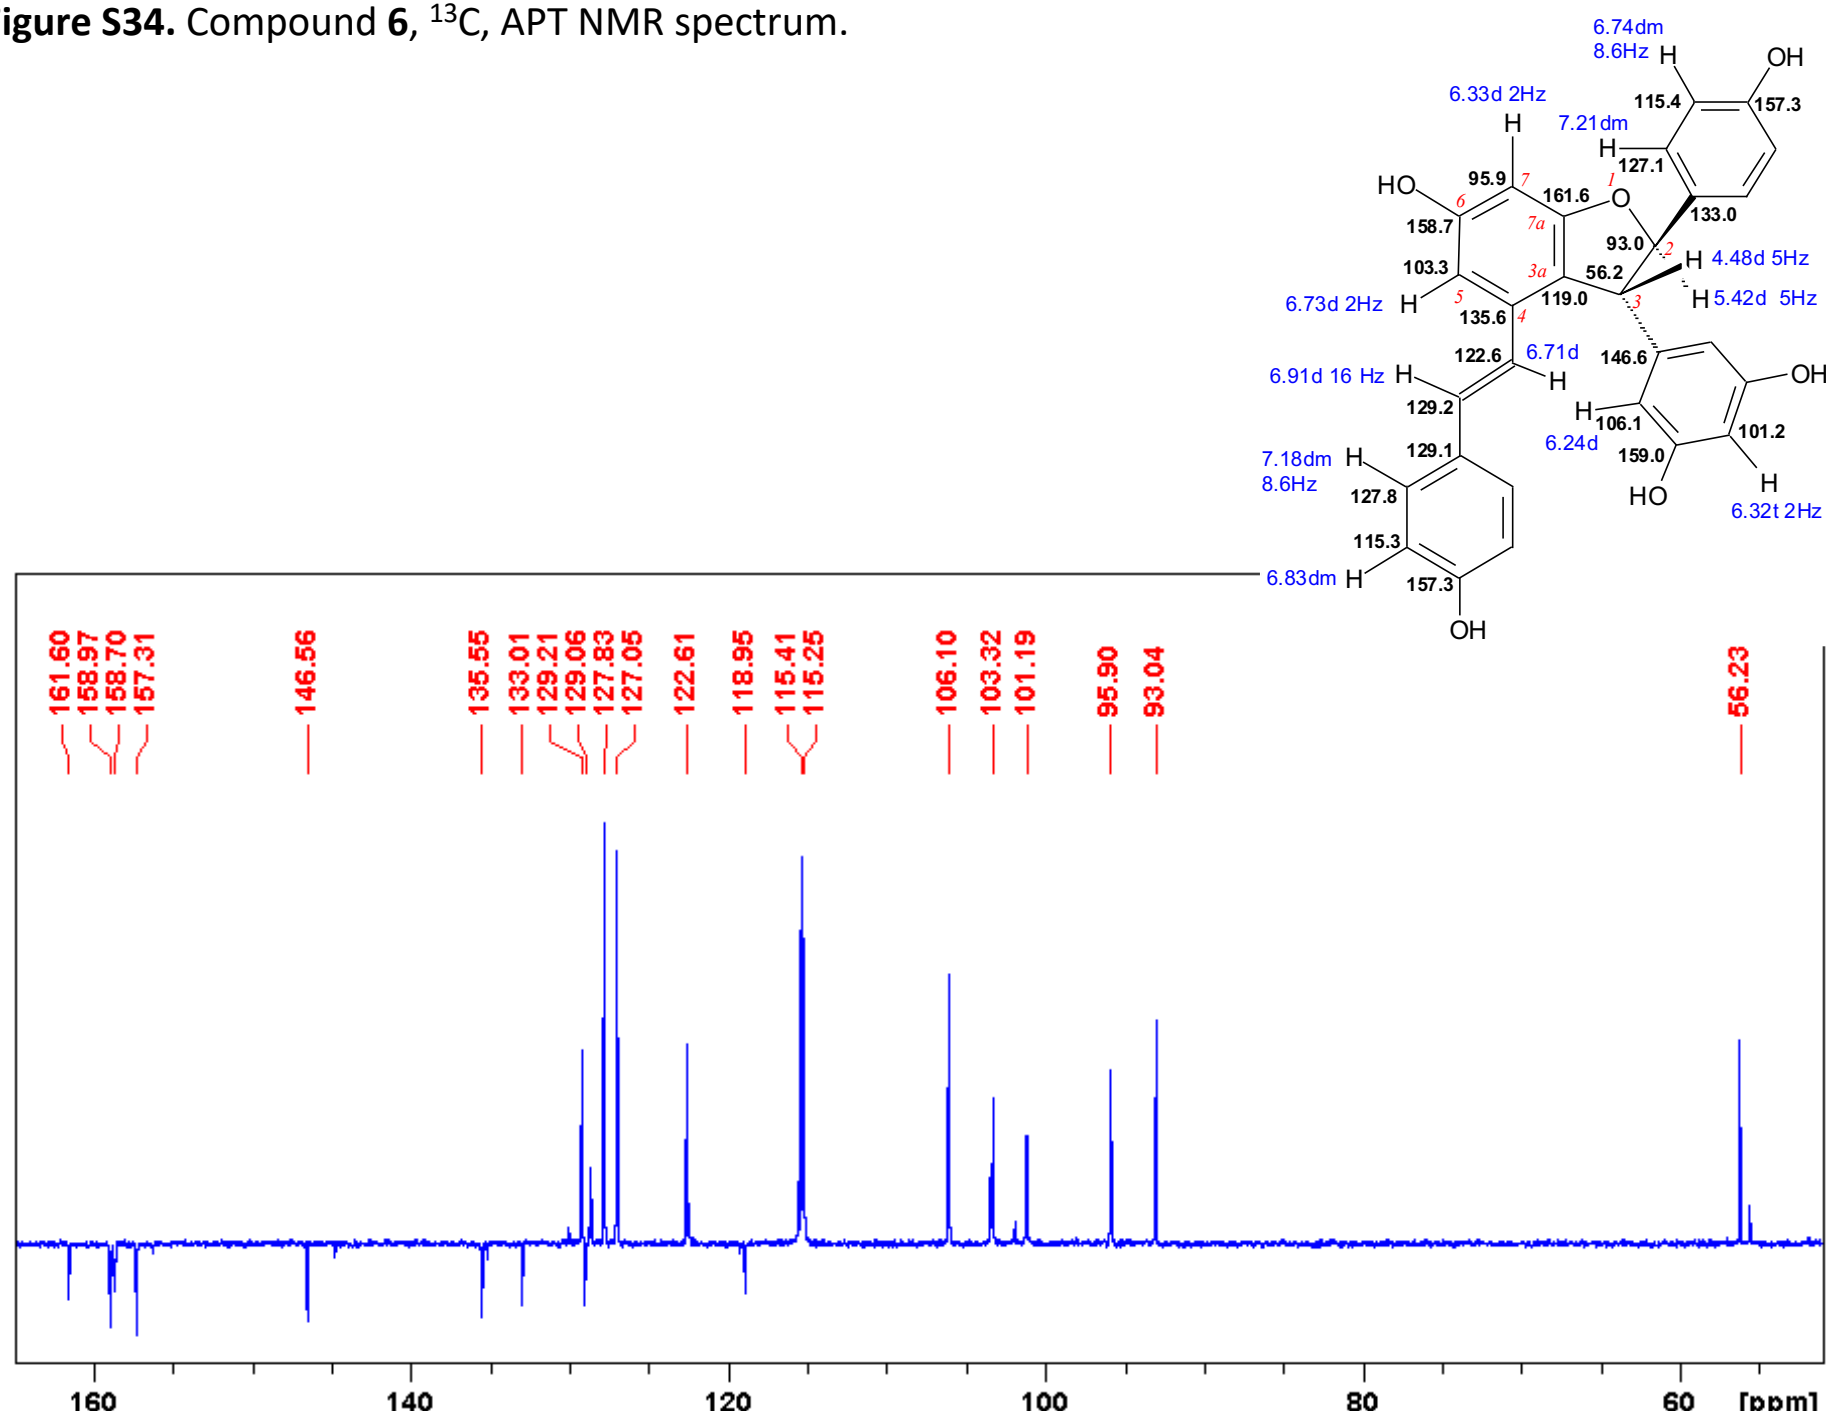

Figure S35. Compound 6, HSQC spectrum.

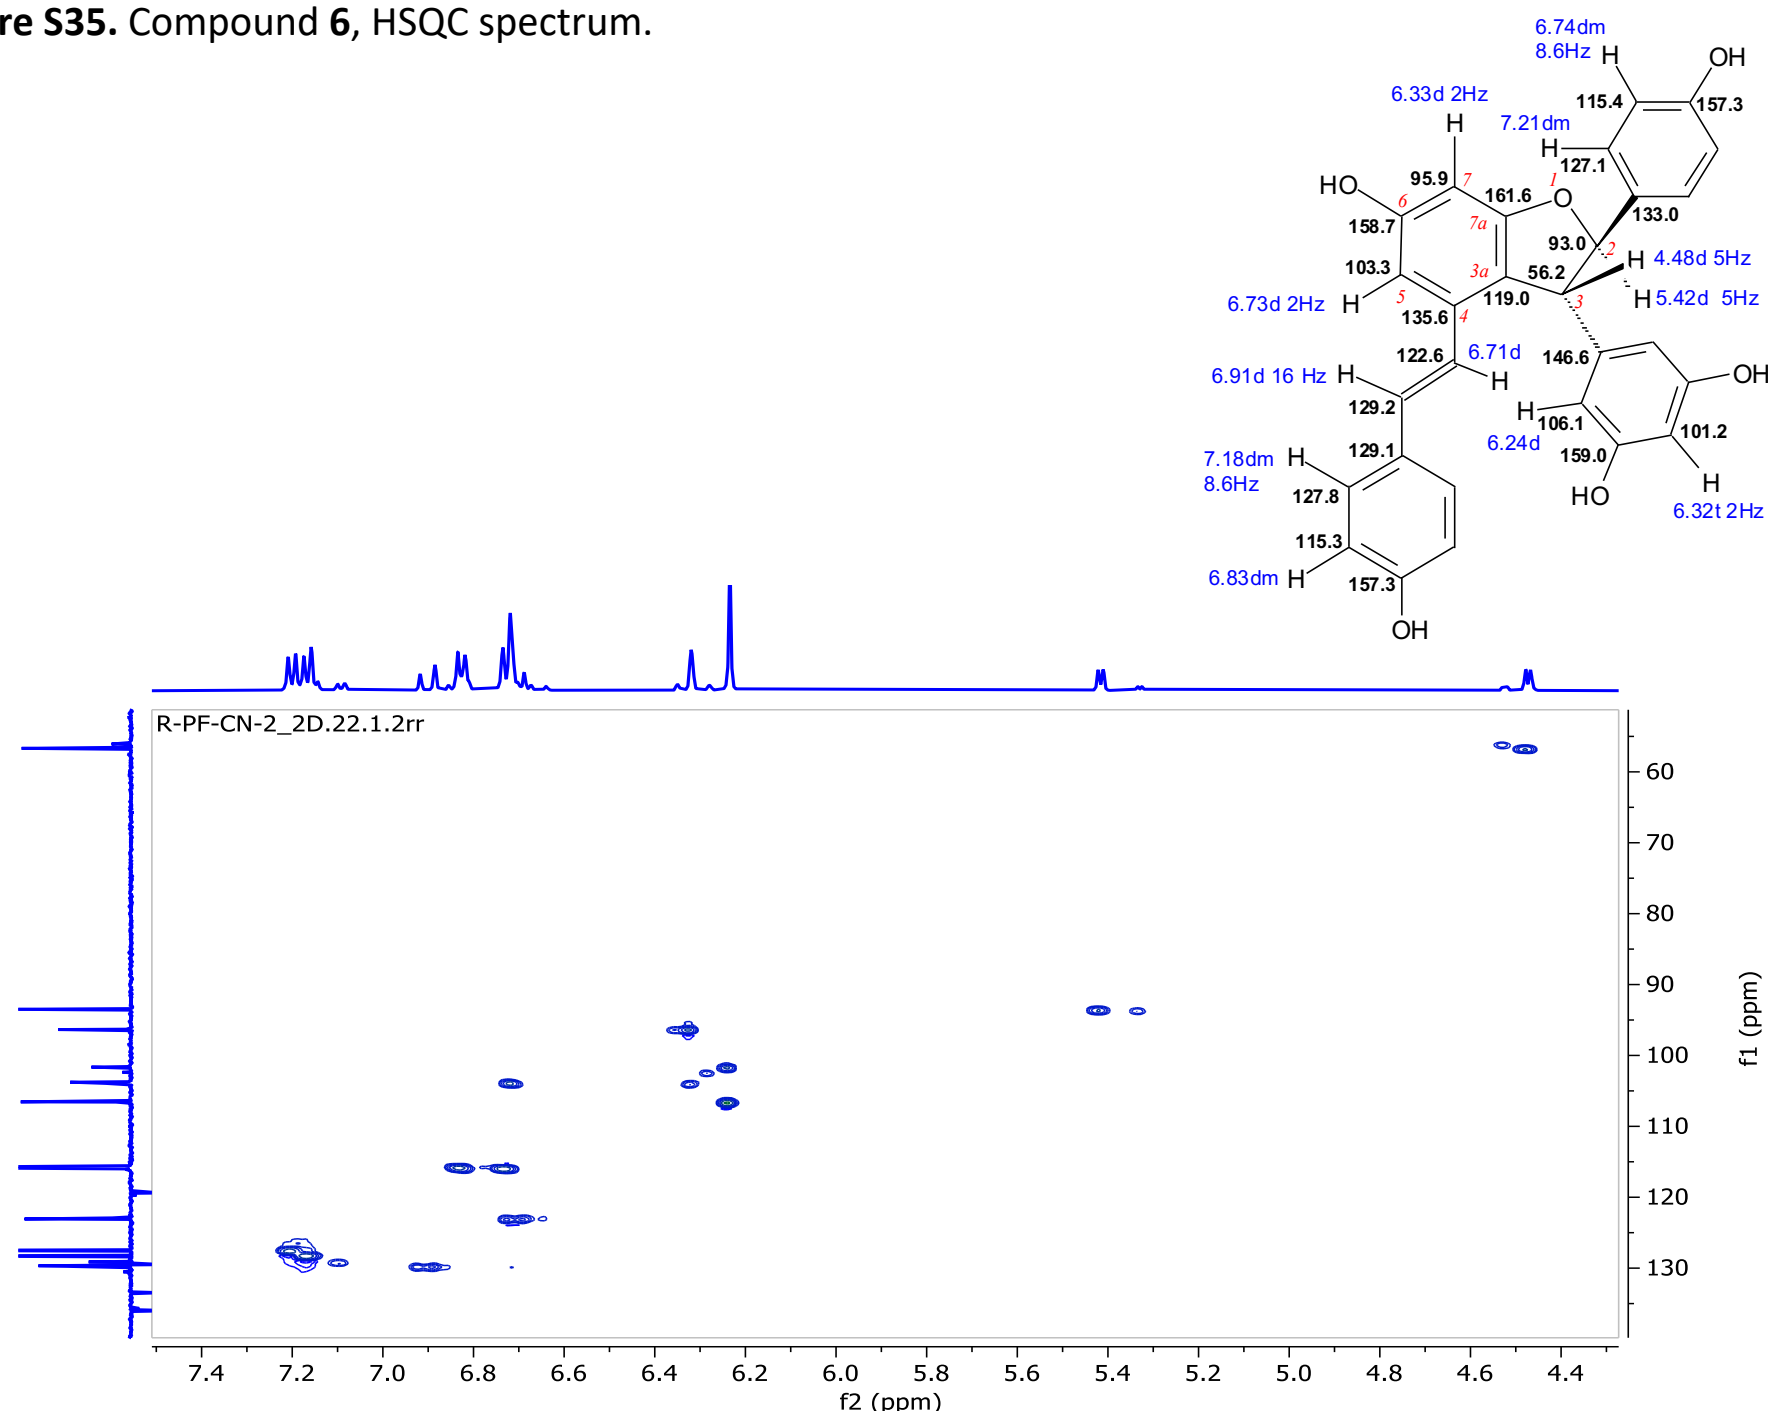

Figure S36. Compound 6, HMBC spectrum.

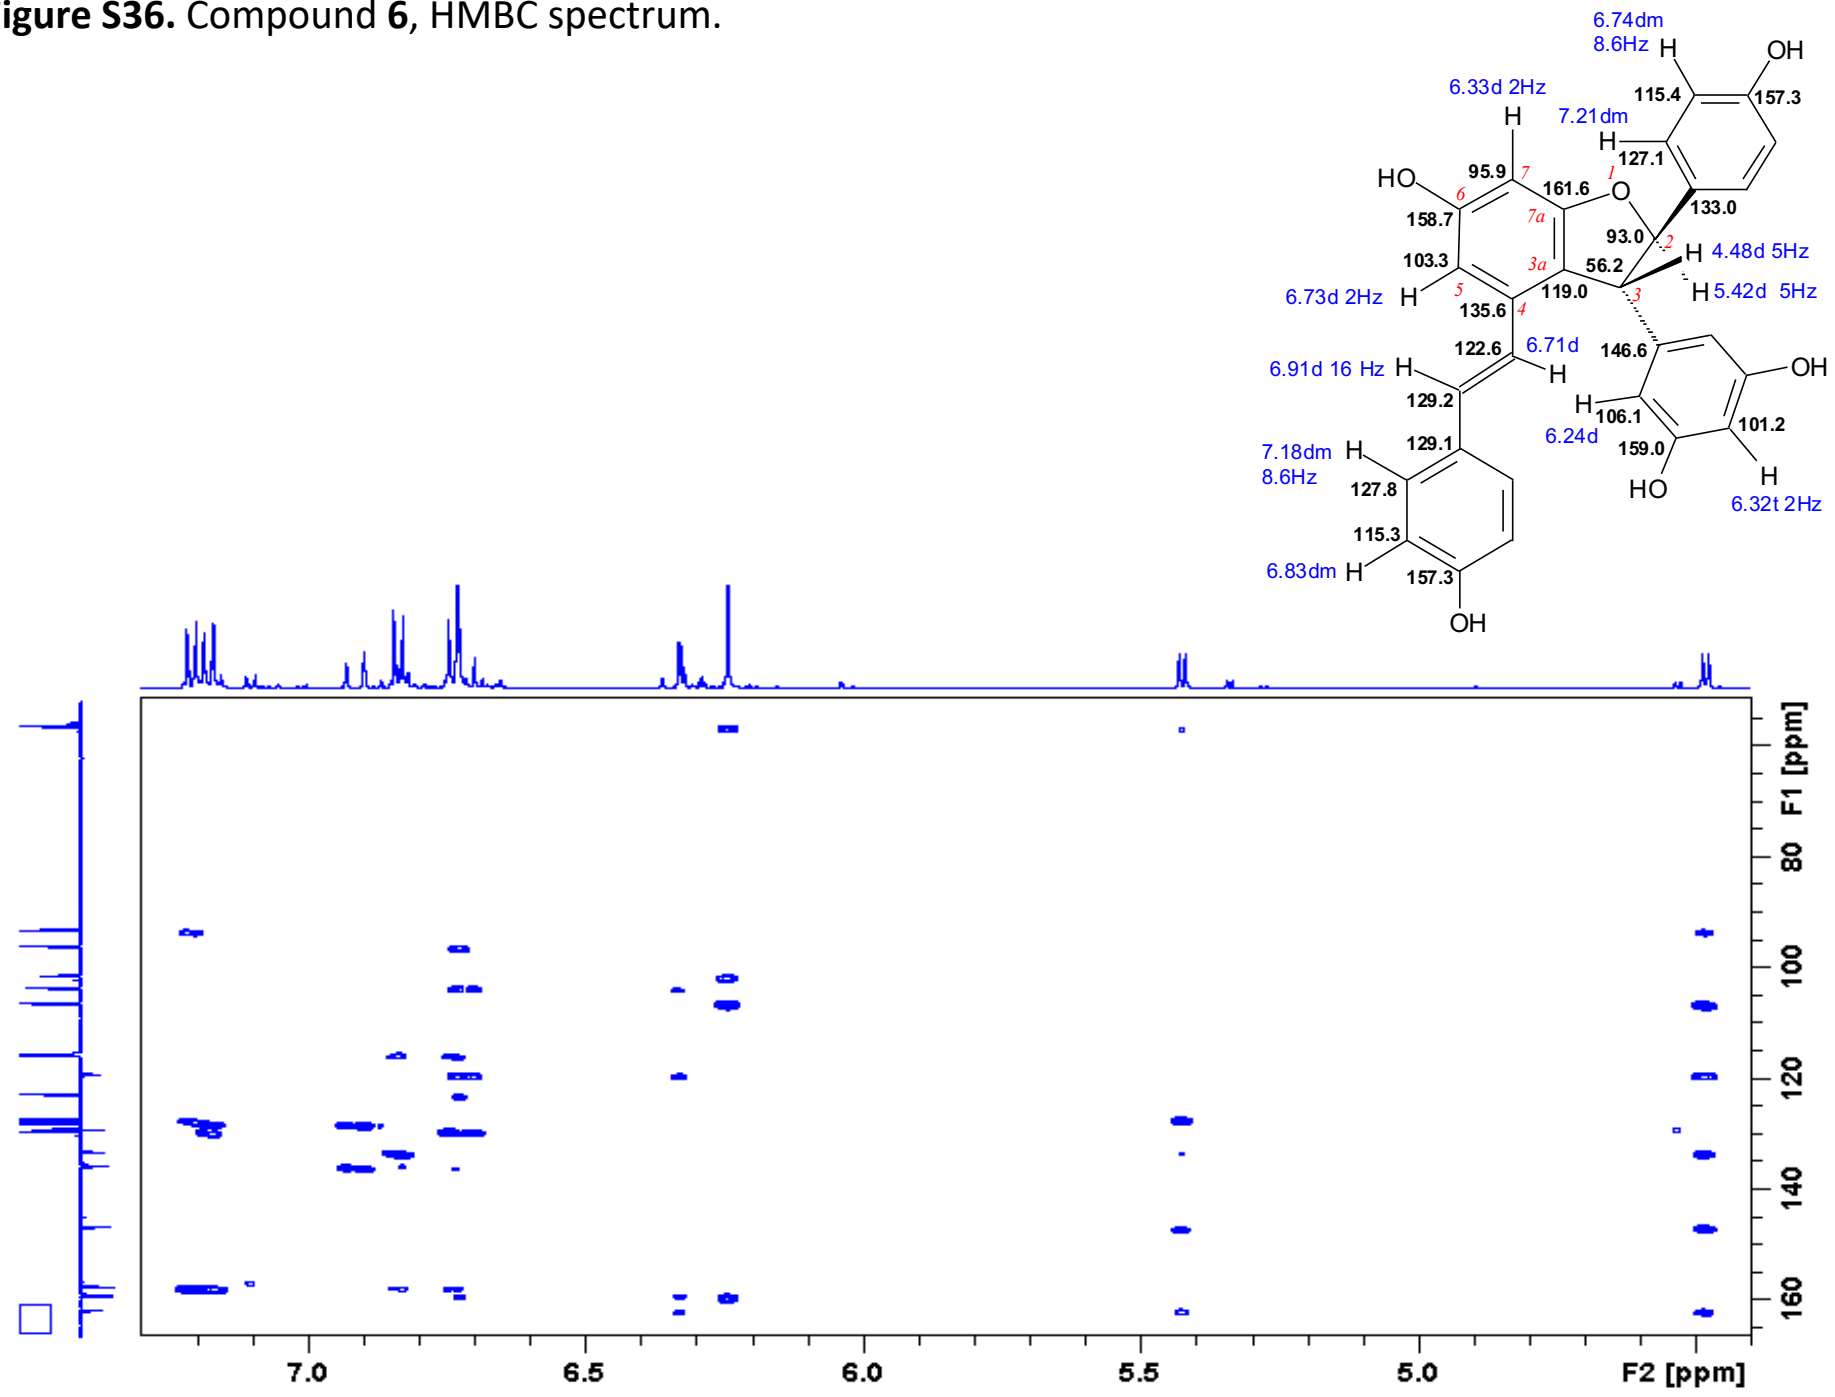

**Figure S37.** Compound **6**, COSY and NOESY spectra.

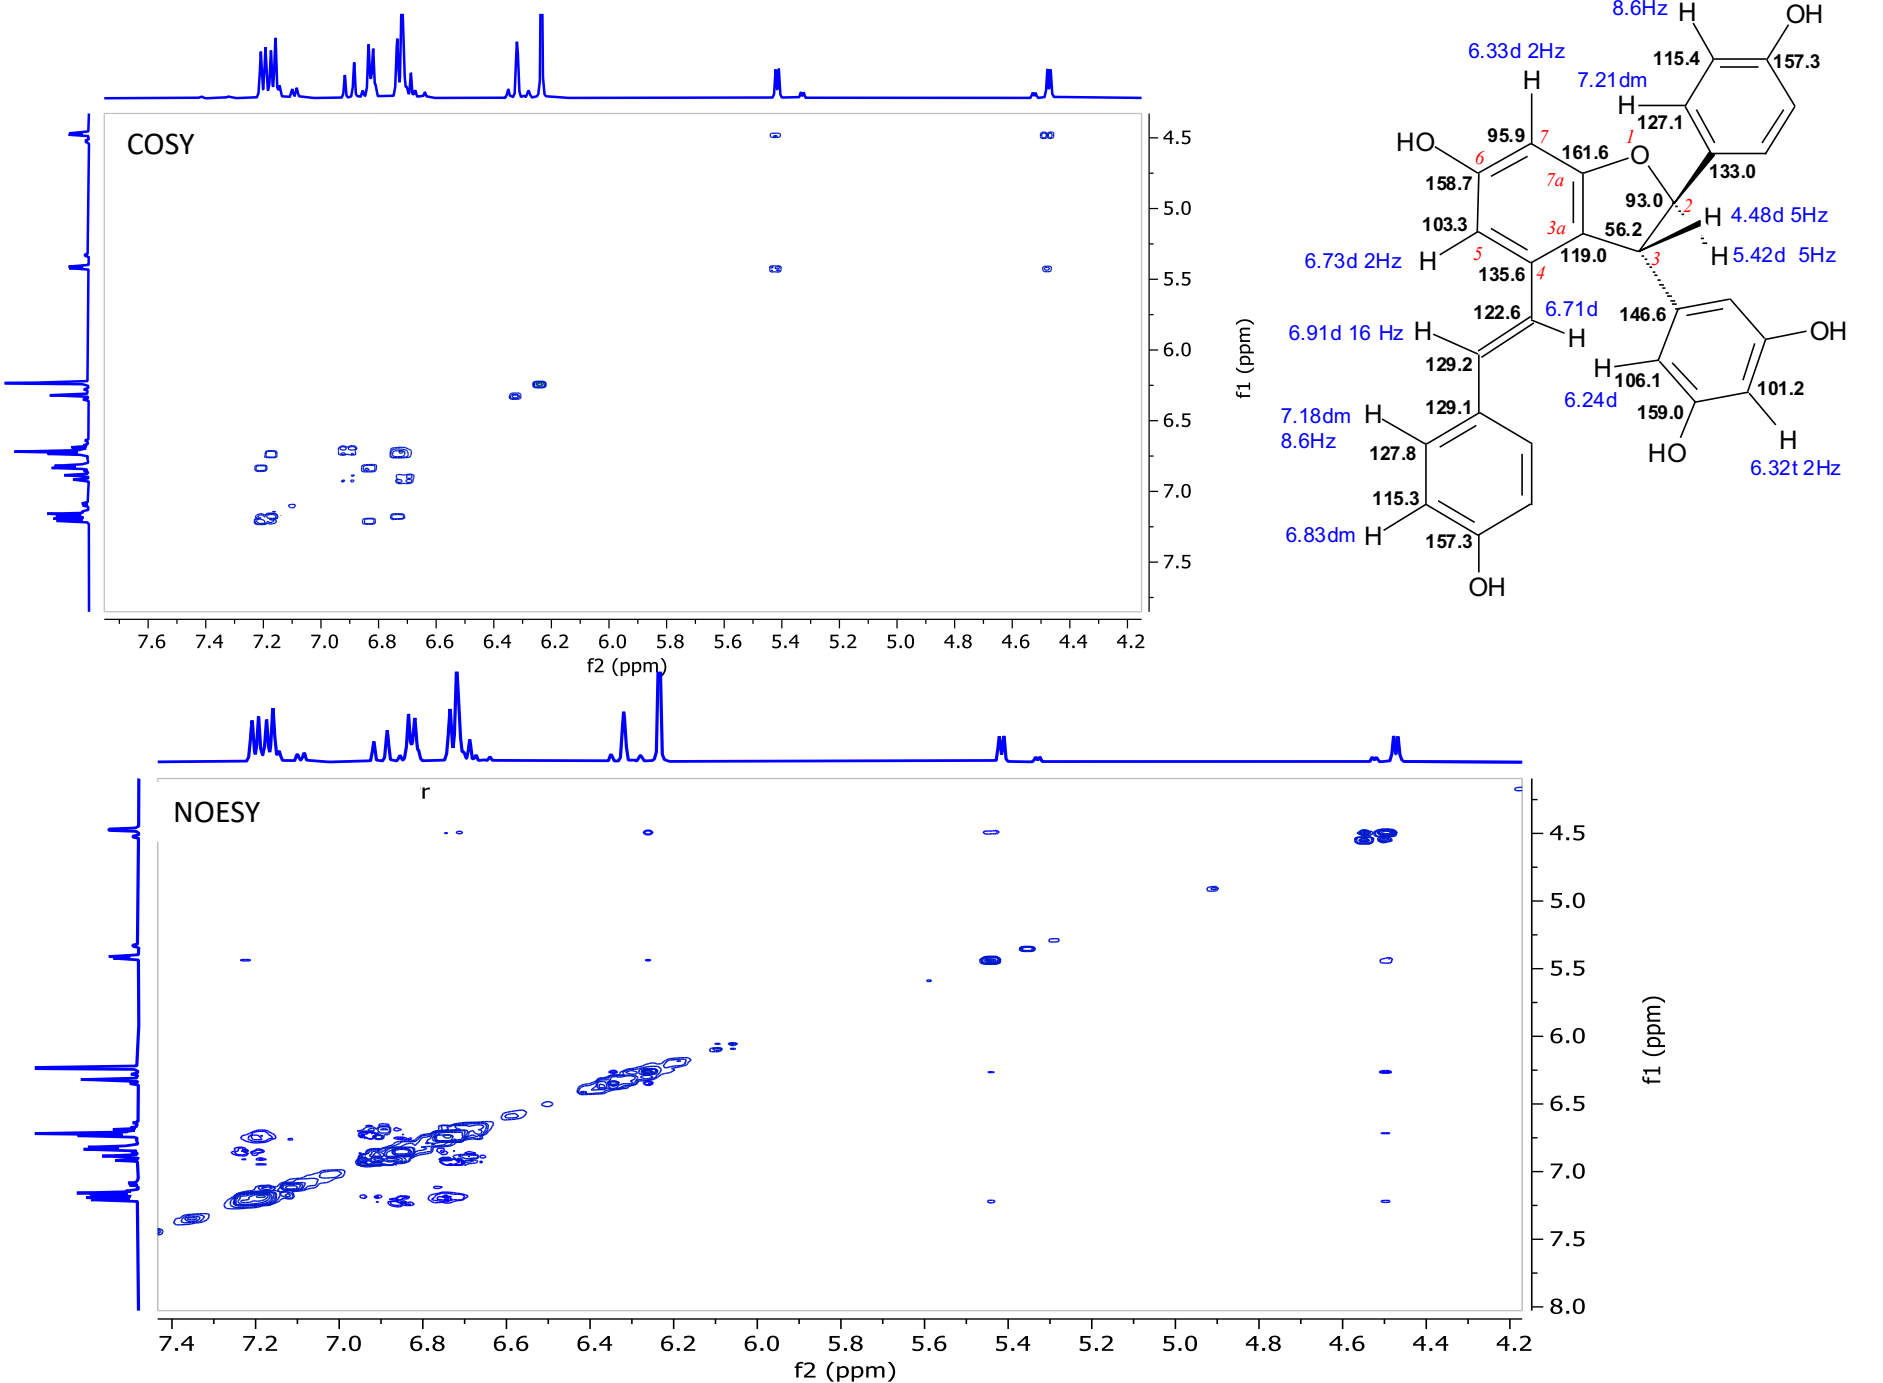



**Figure S38.** Compound **7**,  $^1\text{H}$  NMR spectrum.

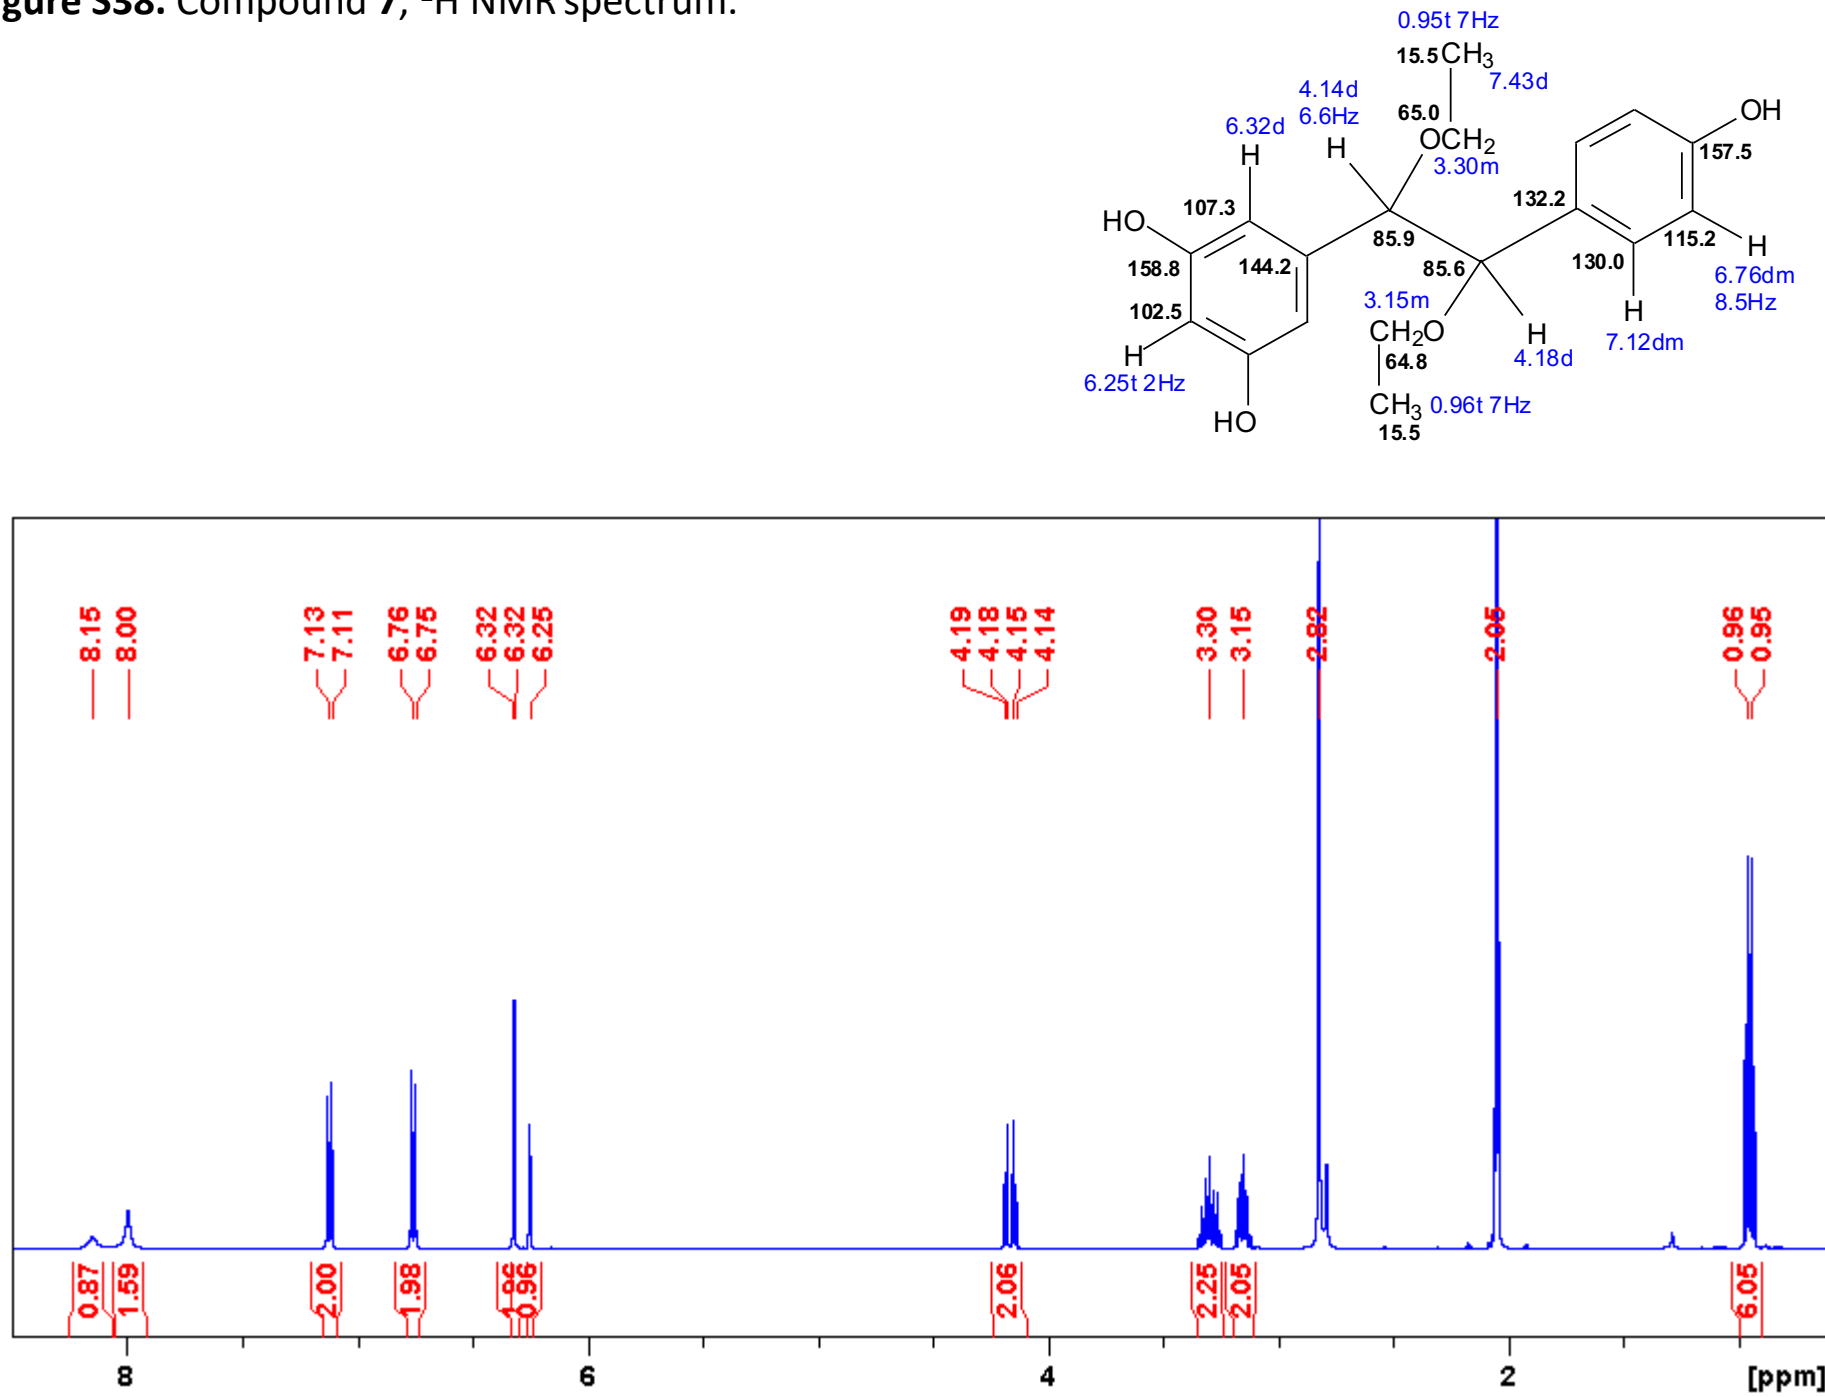

Figure S39. Compound 7, <sup>13</sup>C, APT NMR spectrum.

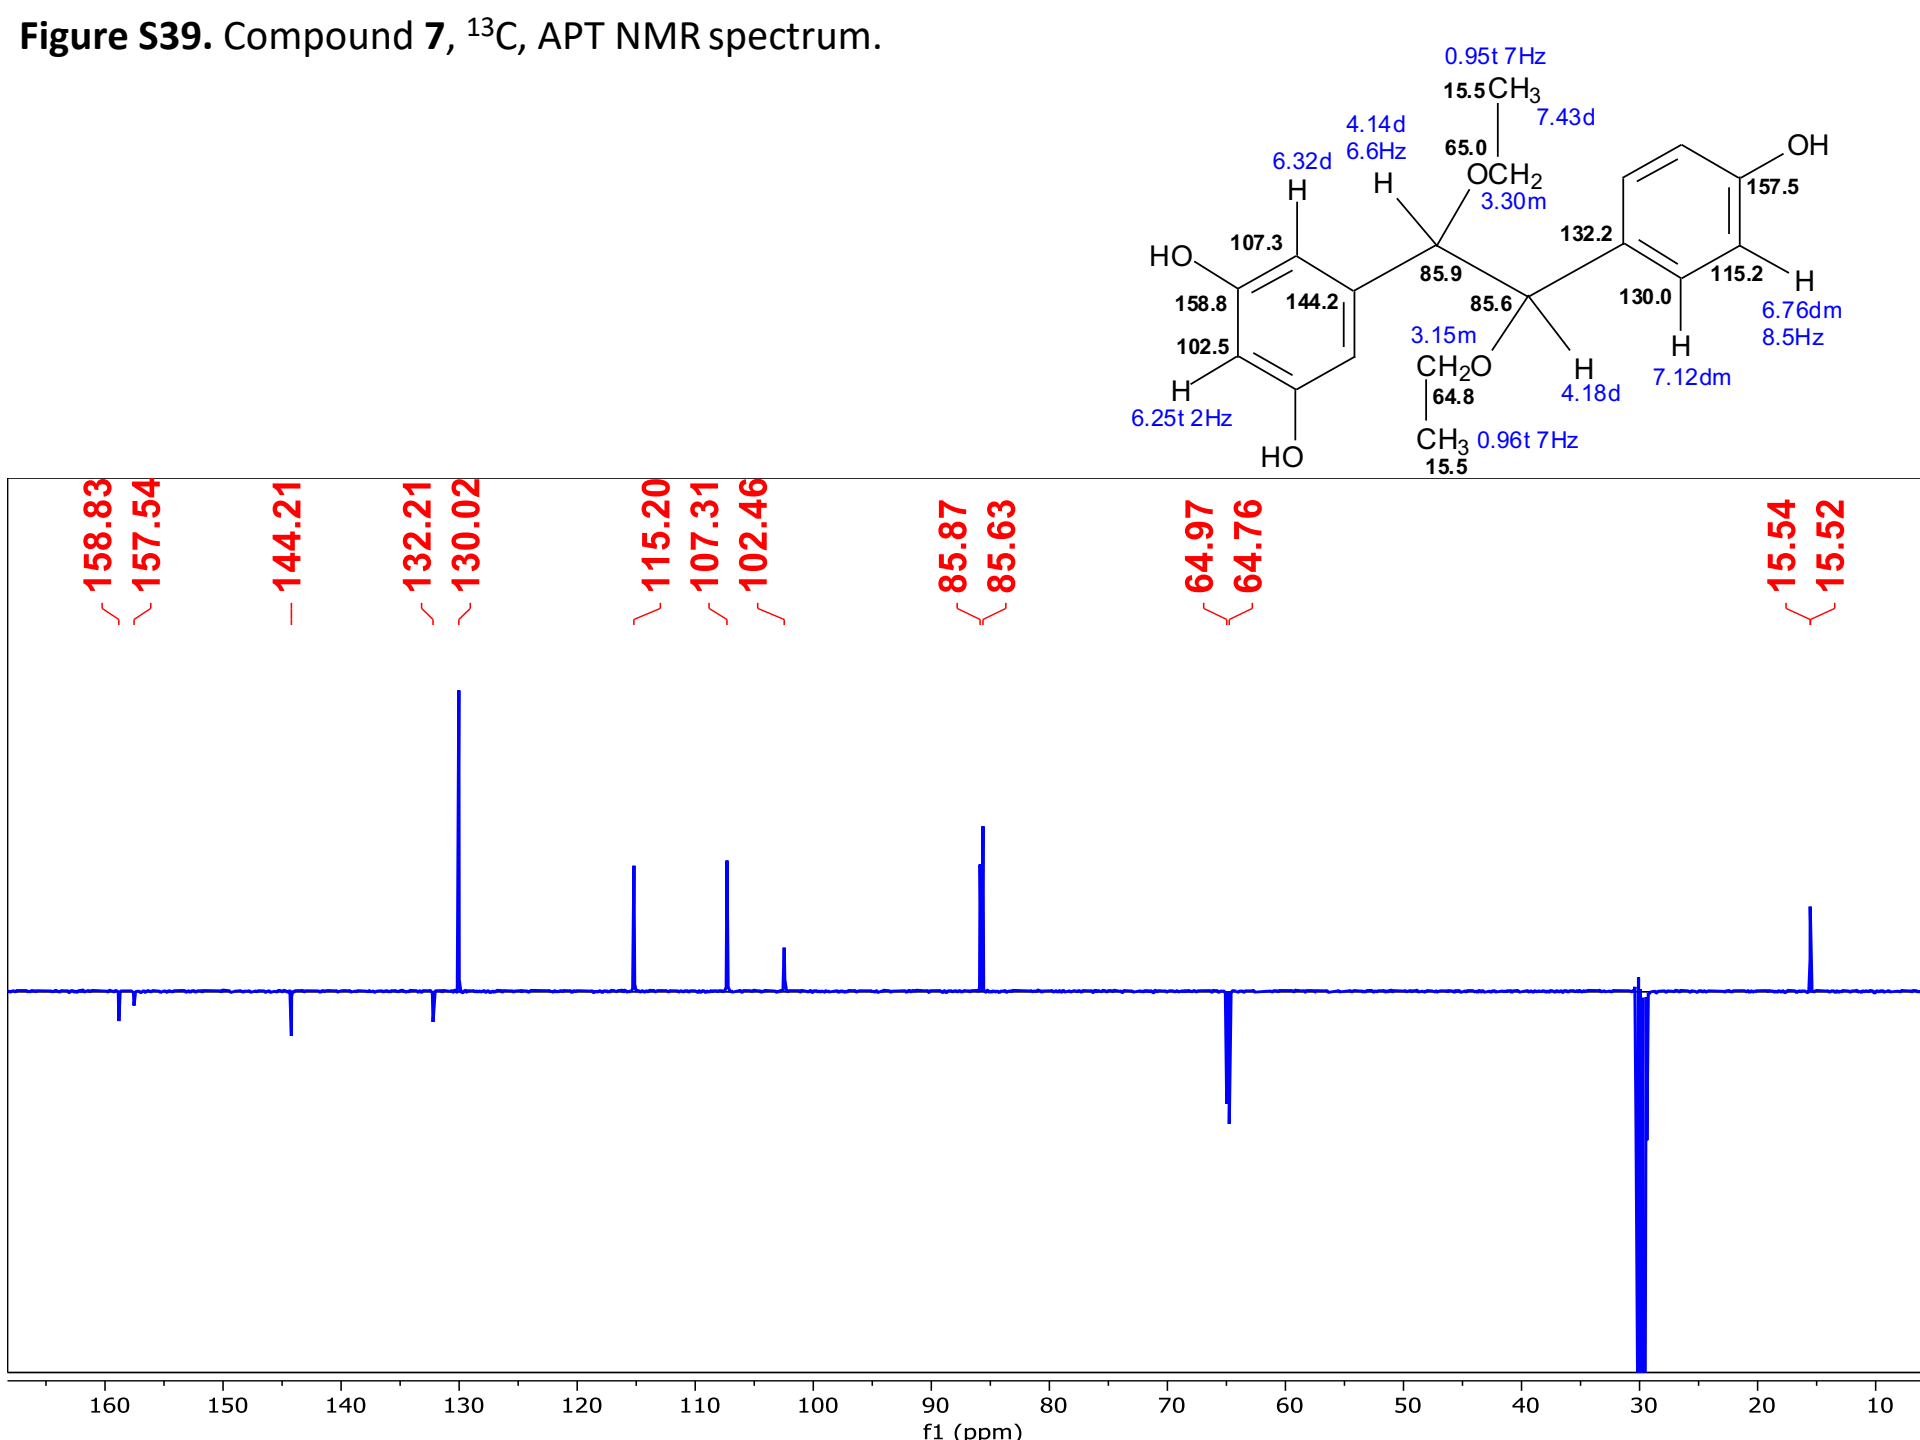

**Figure S40.** Compound **7**, NOESY spectrum and NOESY section.

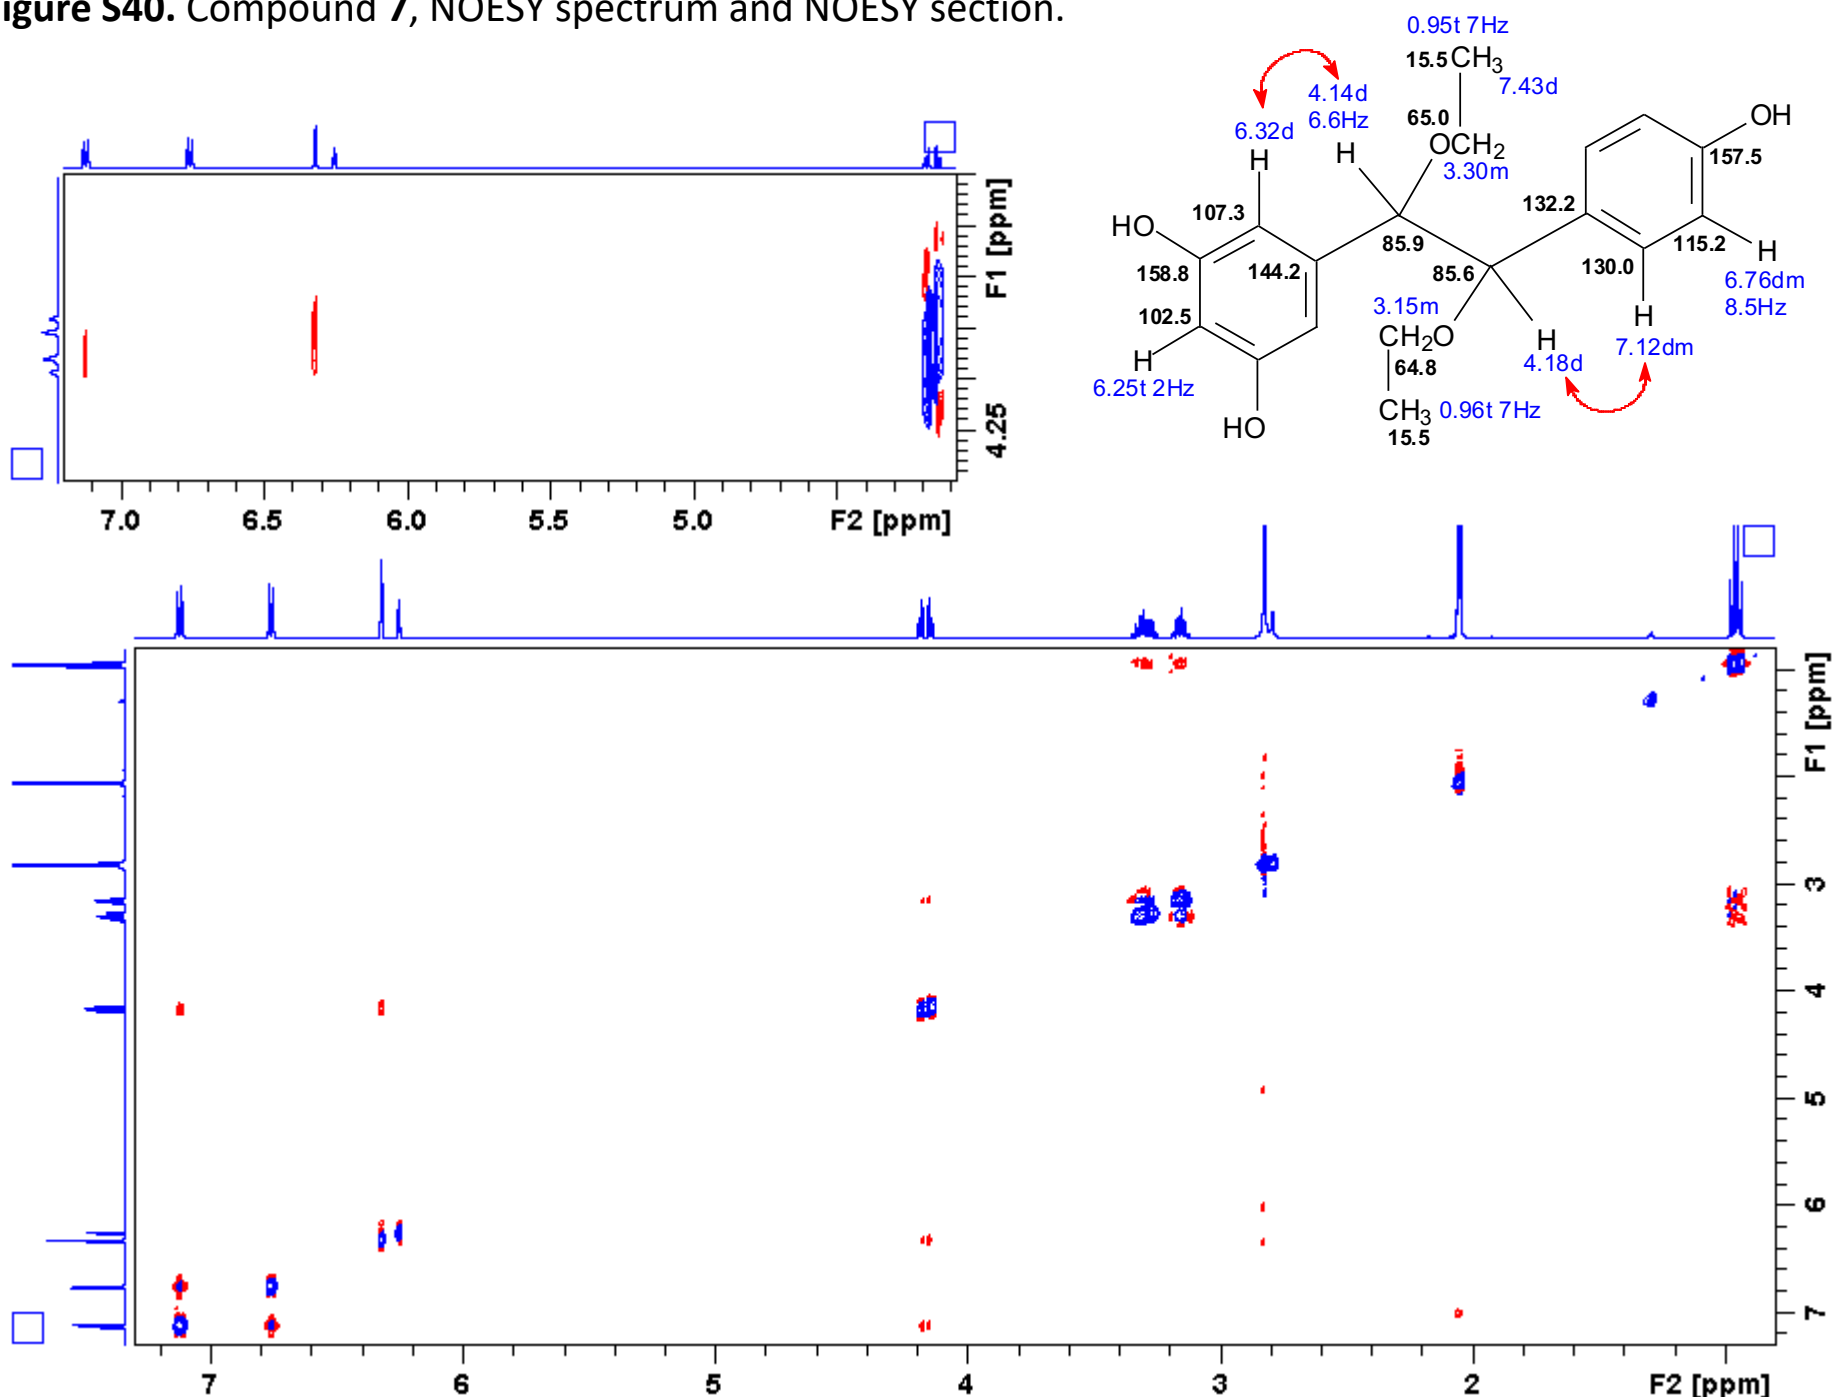

**Figure S41.** Compound **7**, HSQC and HMBC spectra.

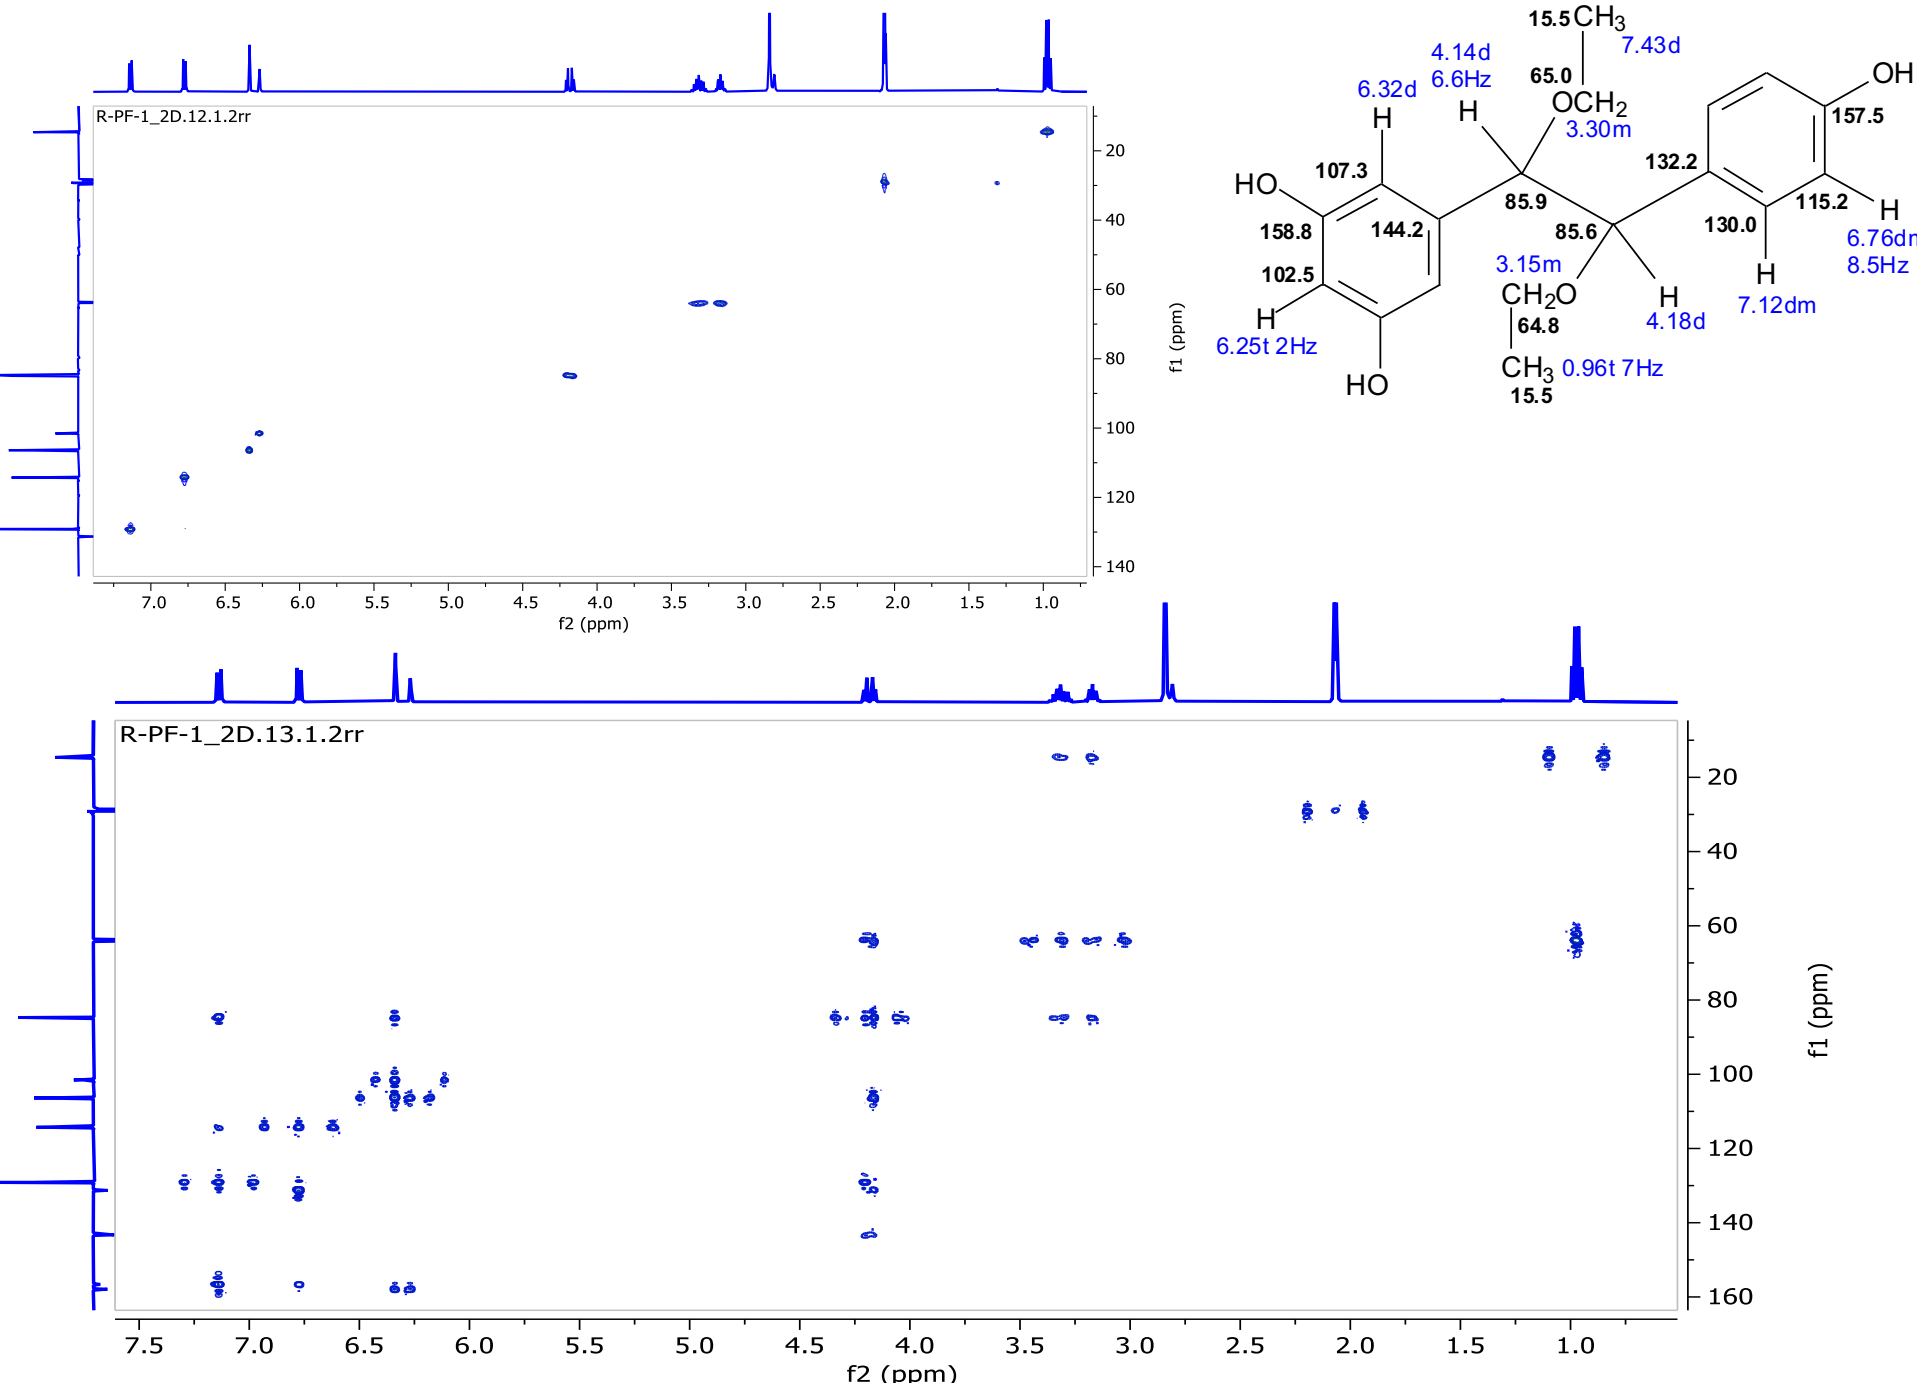

**Figure S42.** Compound **7**, COSY spectrum.

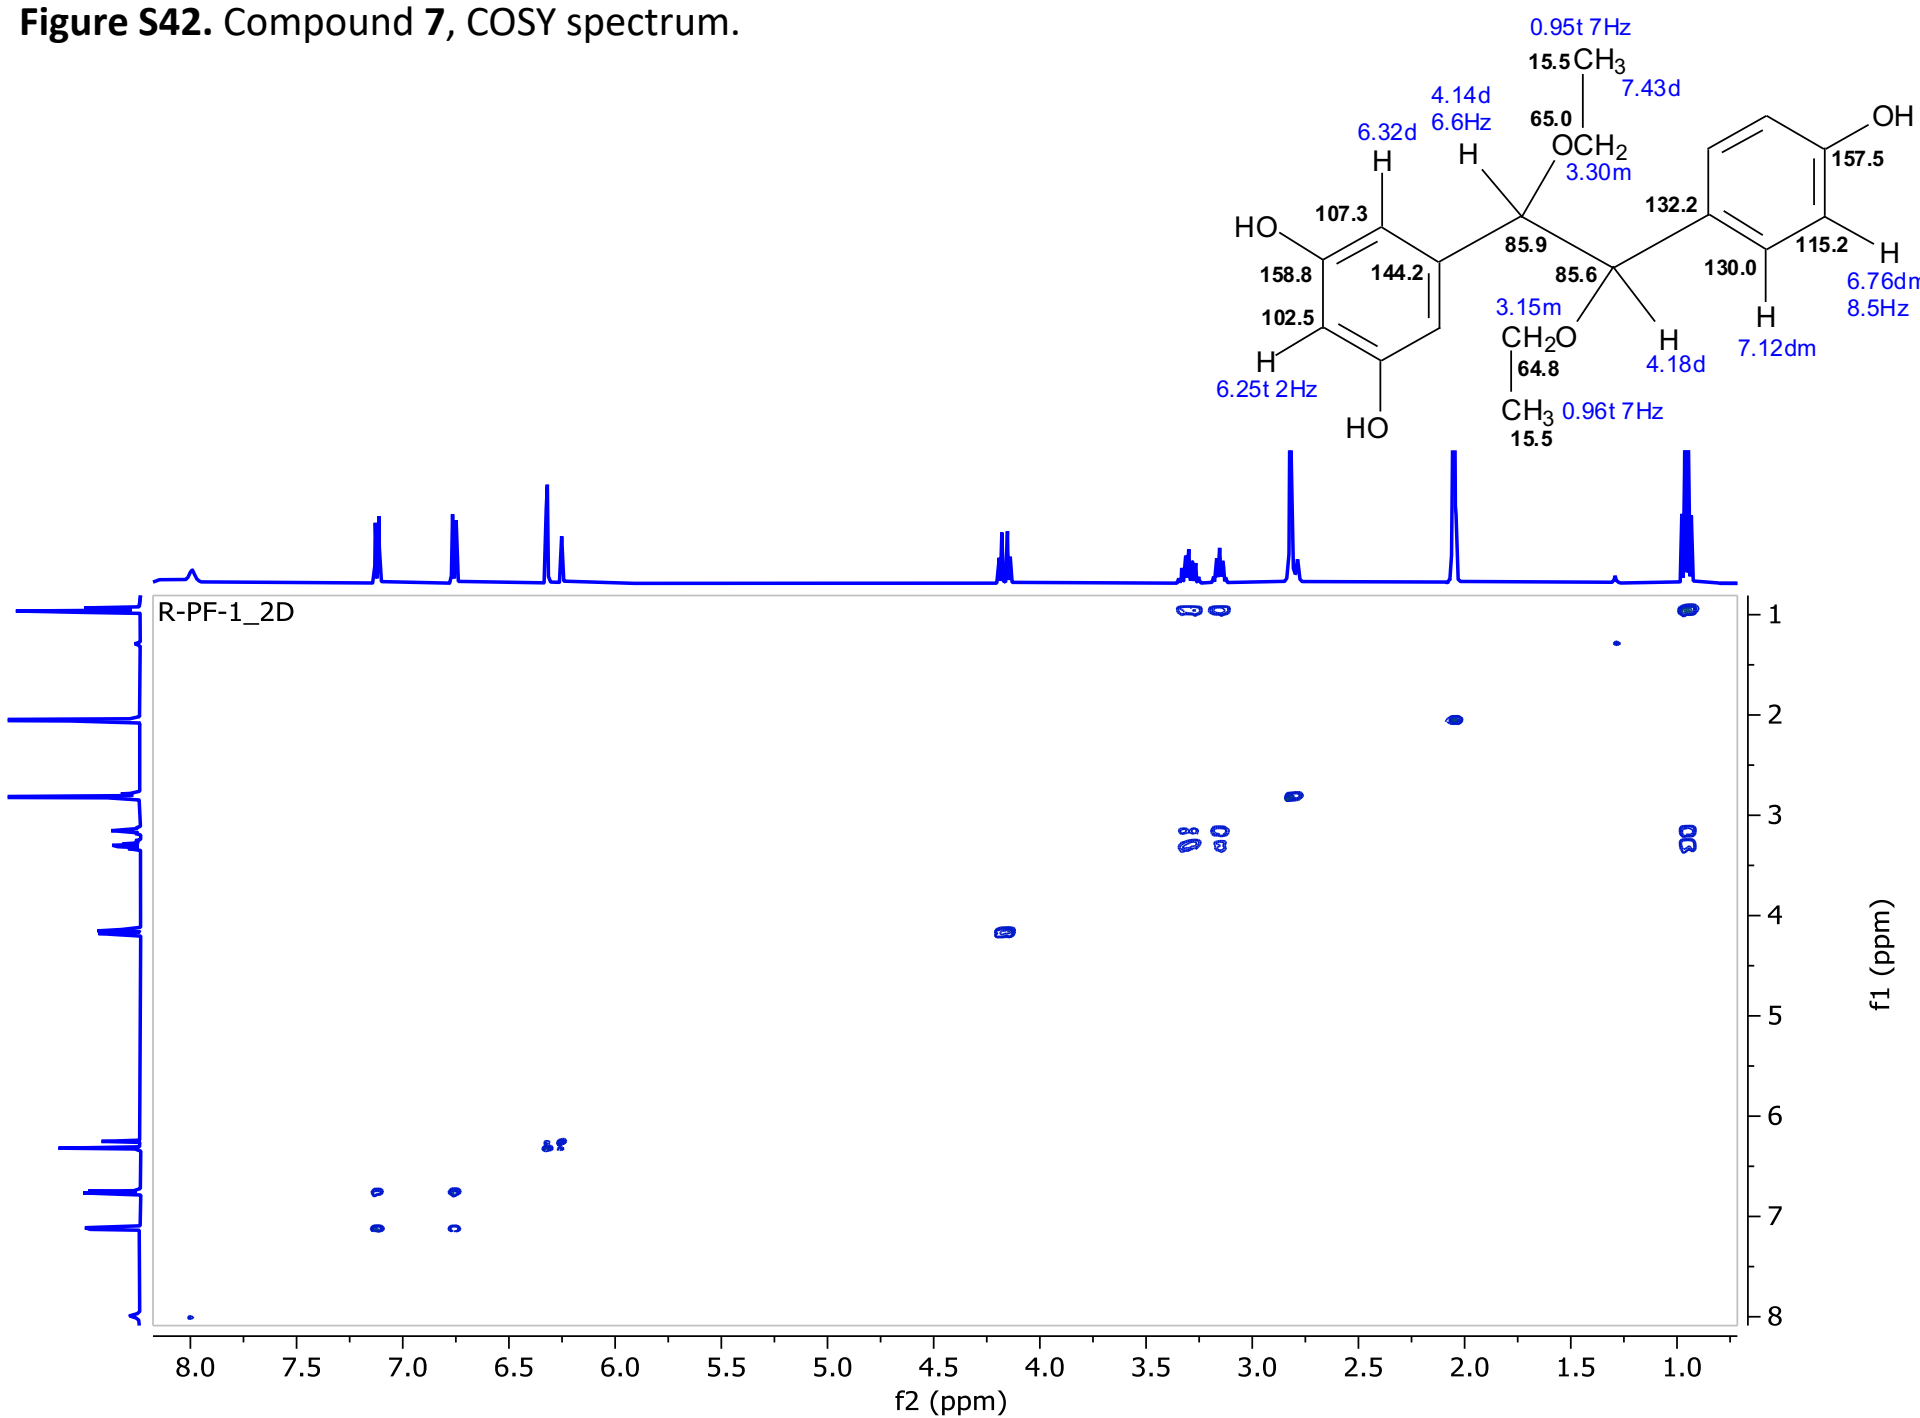

**Figure S43.** Compound **8**,  $^1\text{H}$  NMR spectrum.

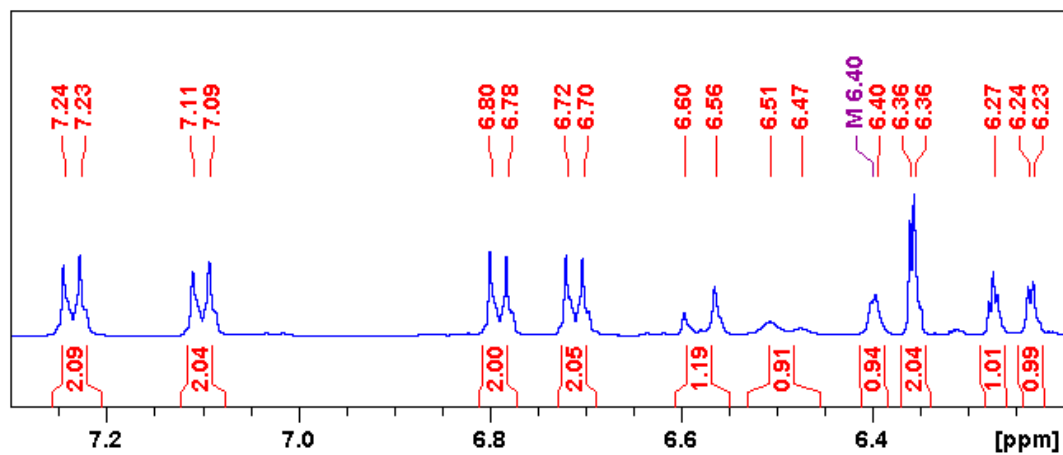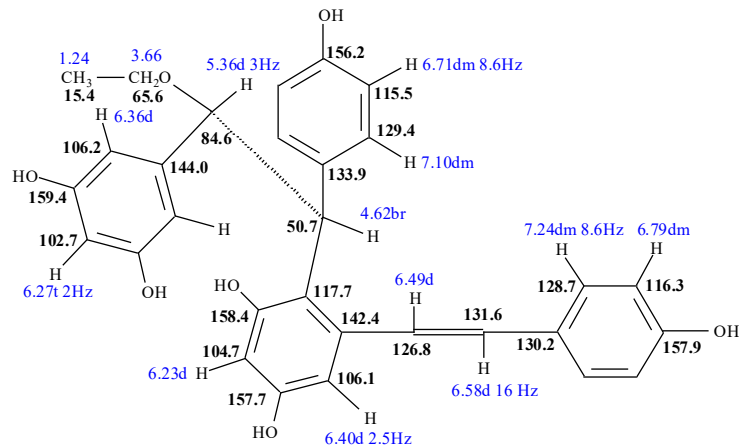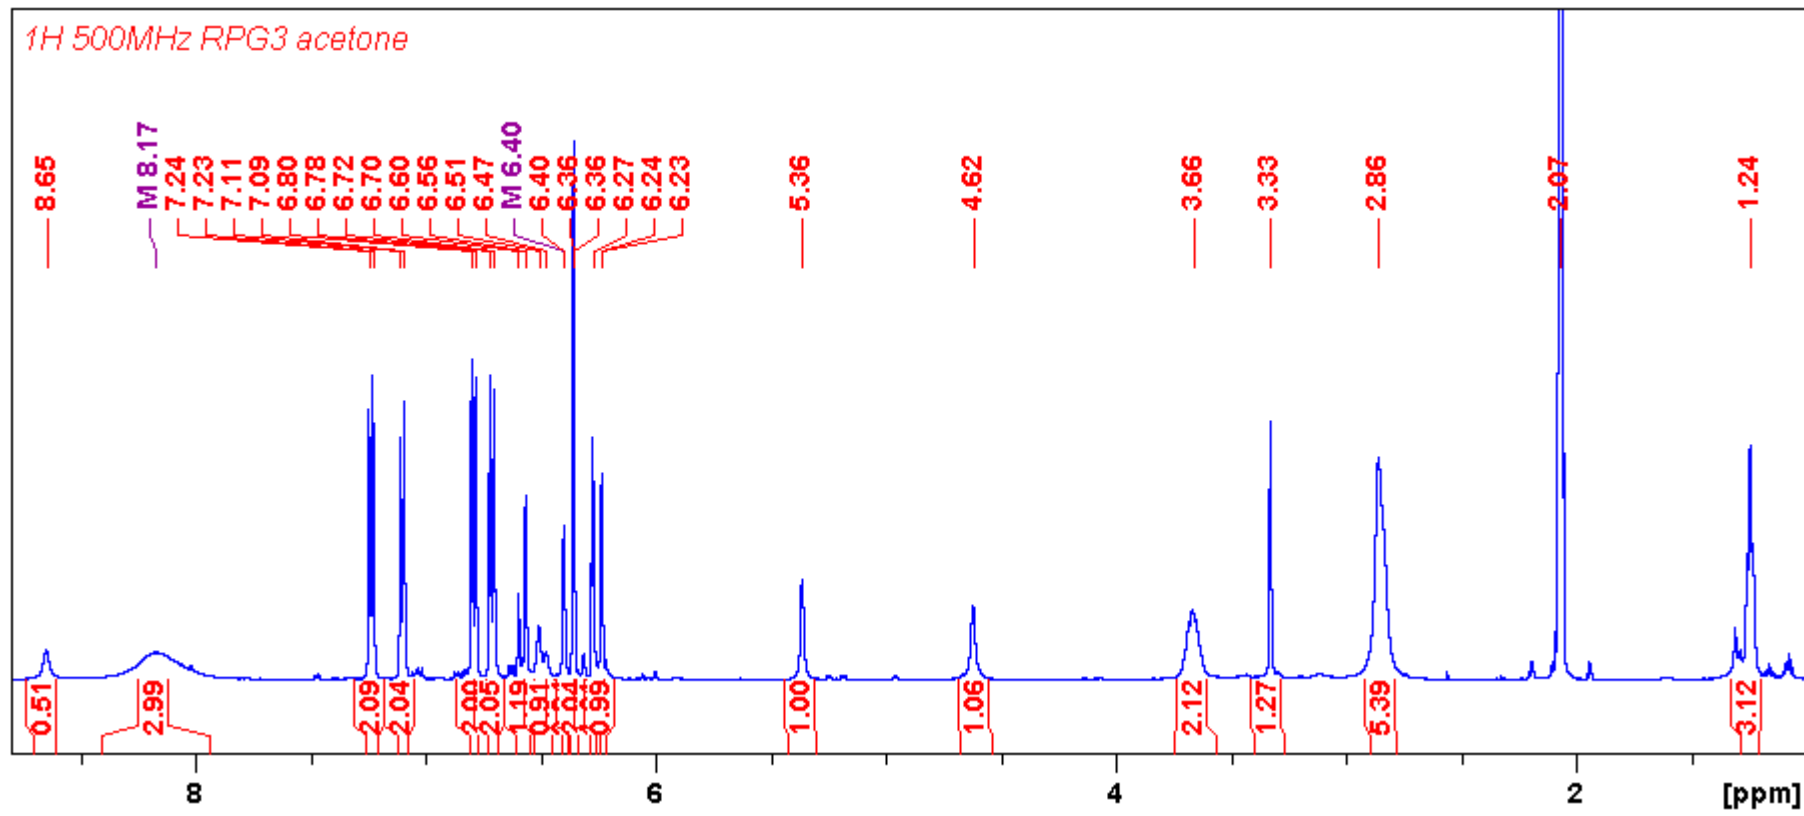

**Figure S44.** Compound **8**,  $^{13}\text{C}$ , APT NMR spectrum.

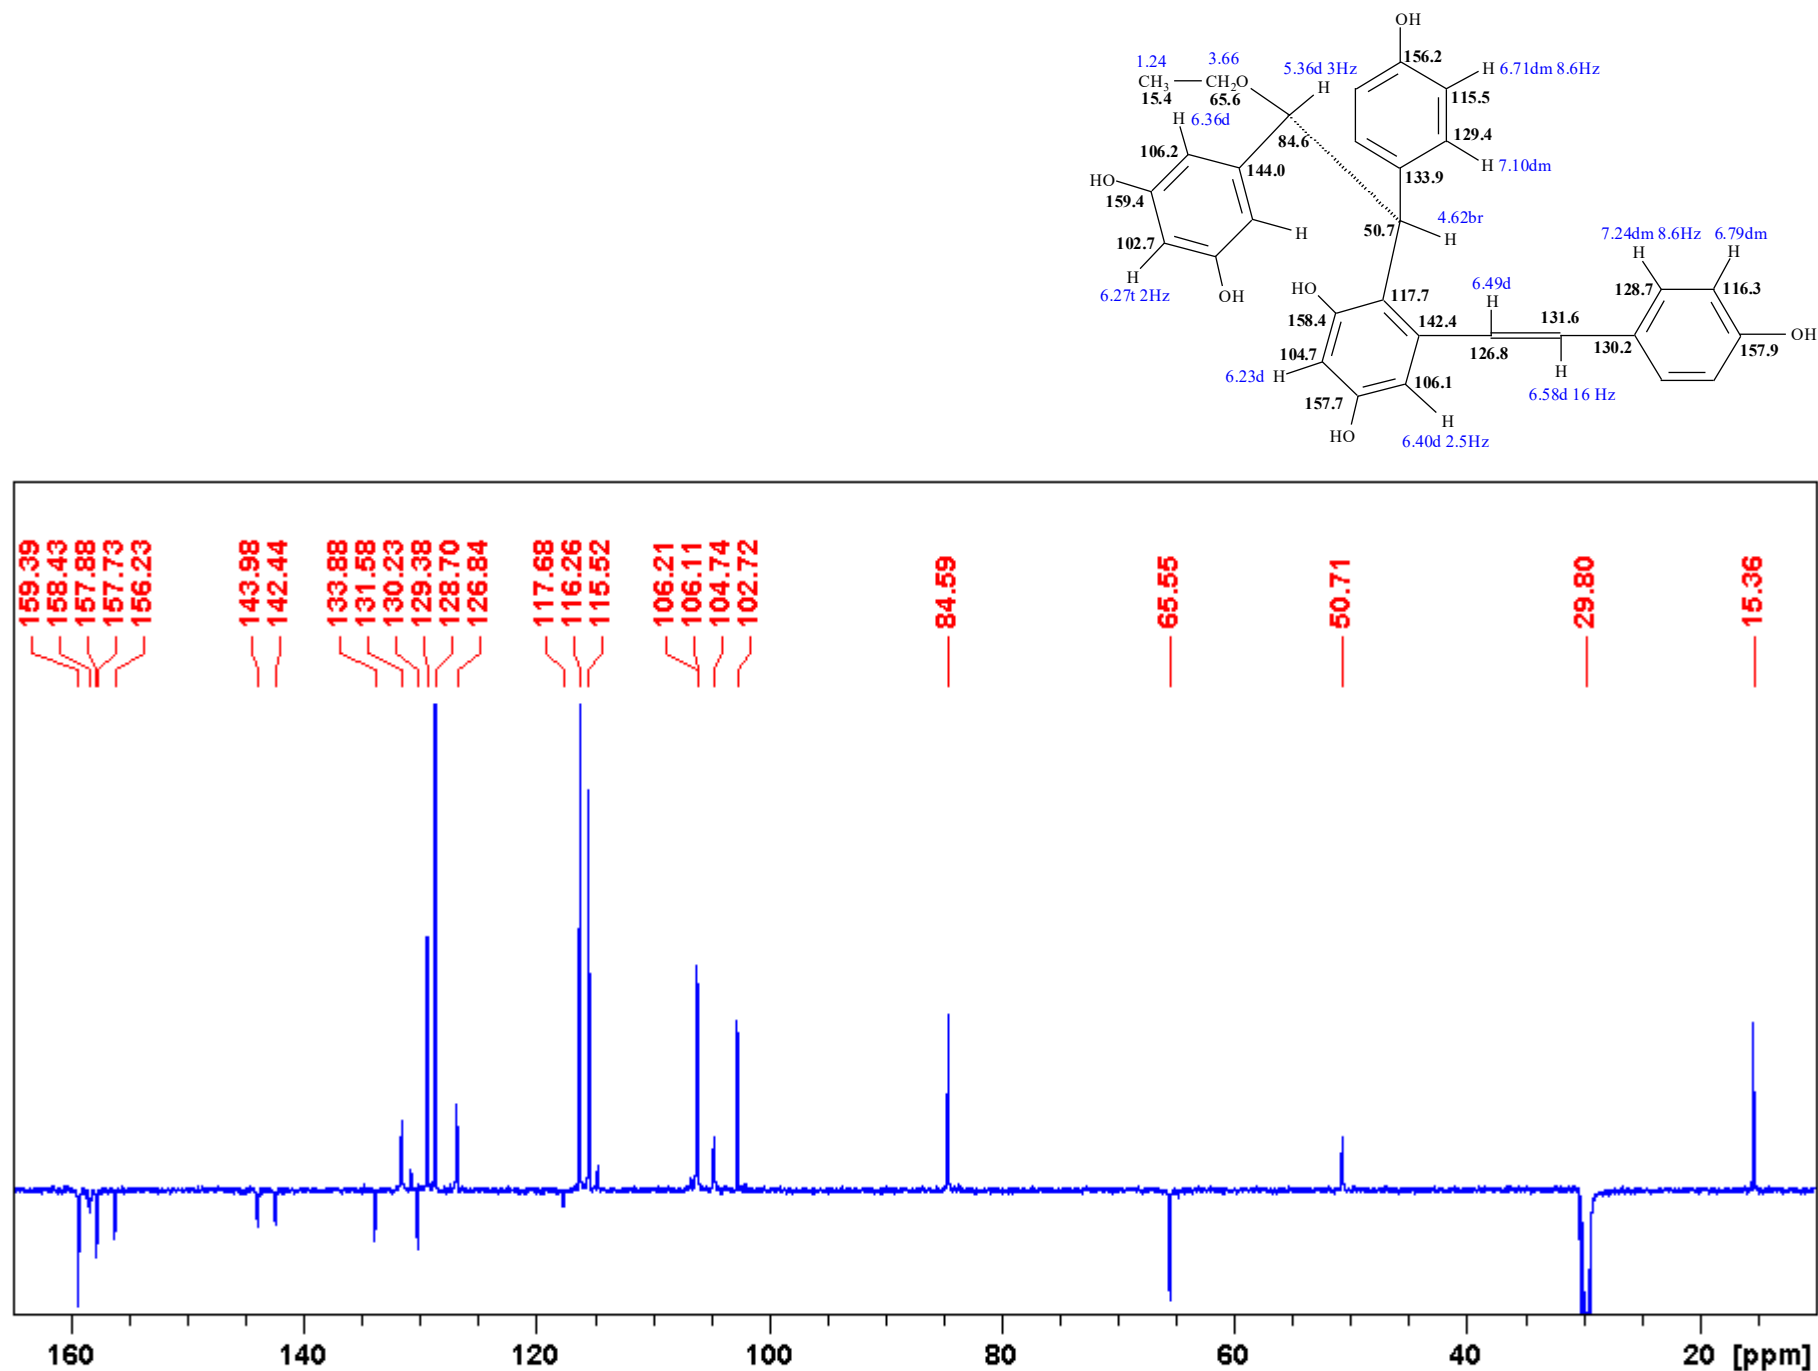

**Figure S45.** Compound **8**, HSQC spectrum and HSQC section.

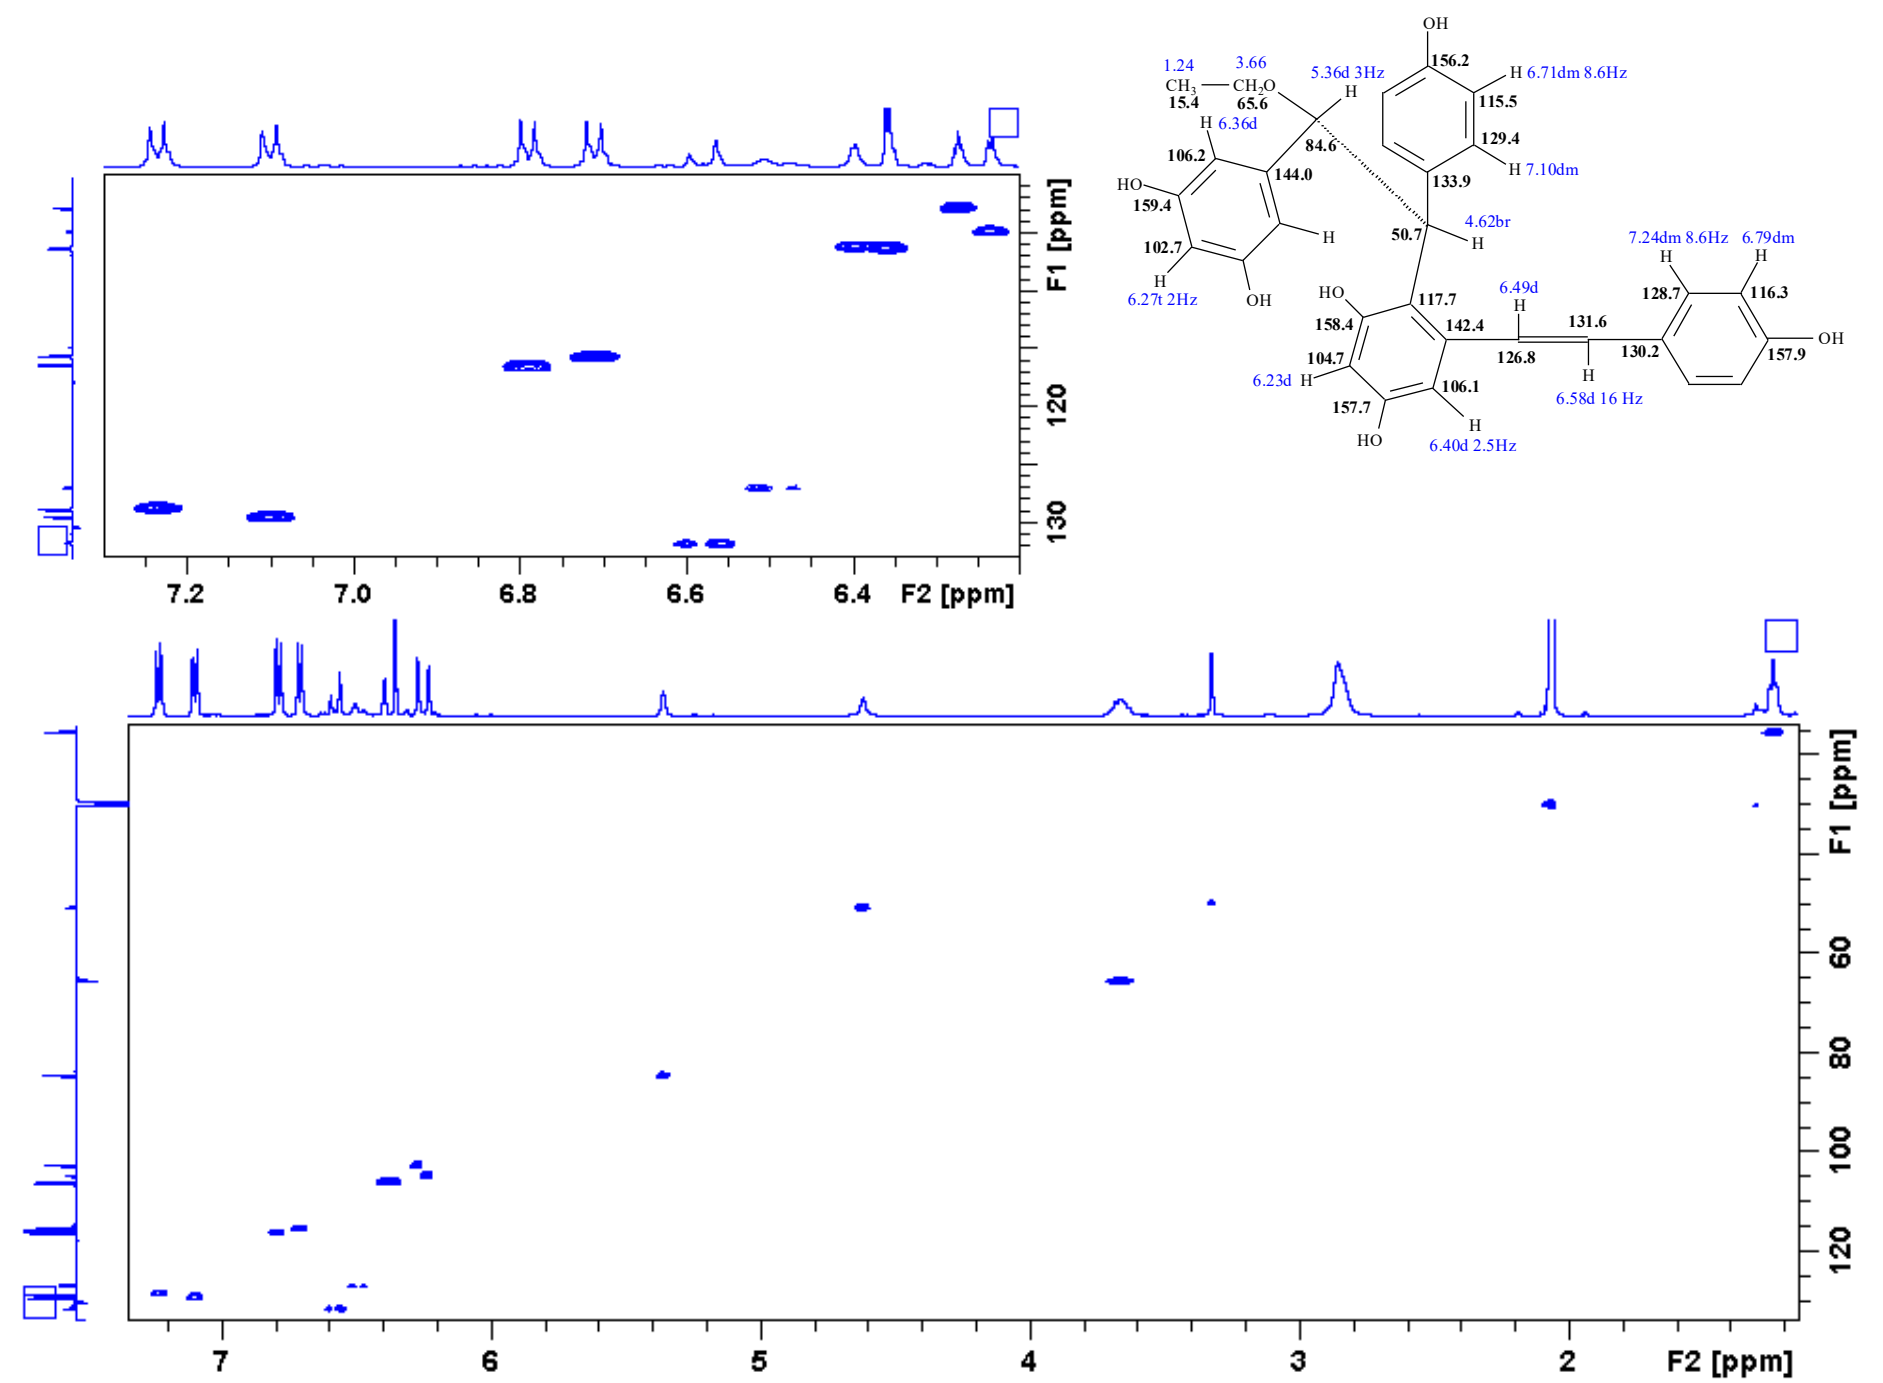



**Figure S46.** Compound **8**, HMBC spectrum and HMBC section; arrows indicate characteristic responses.

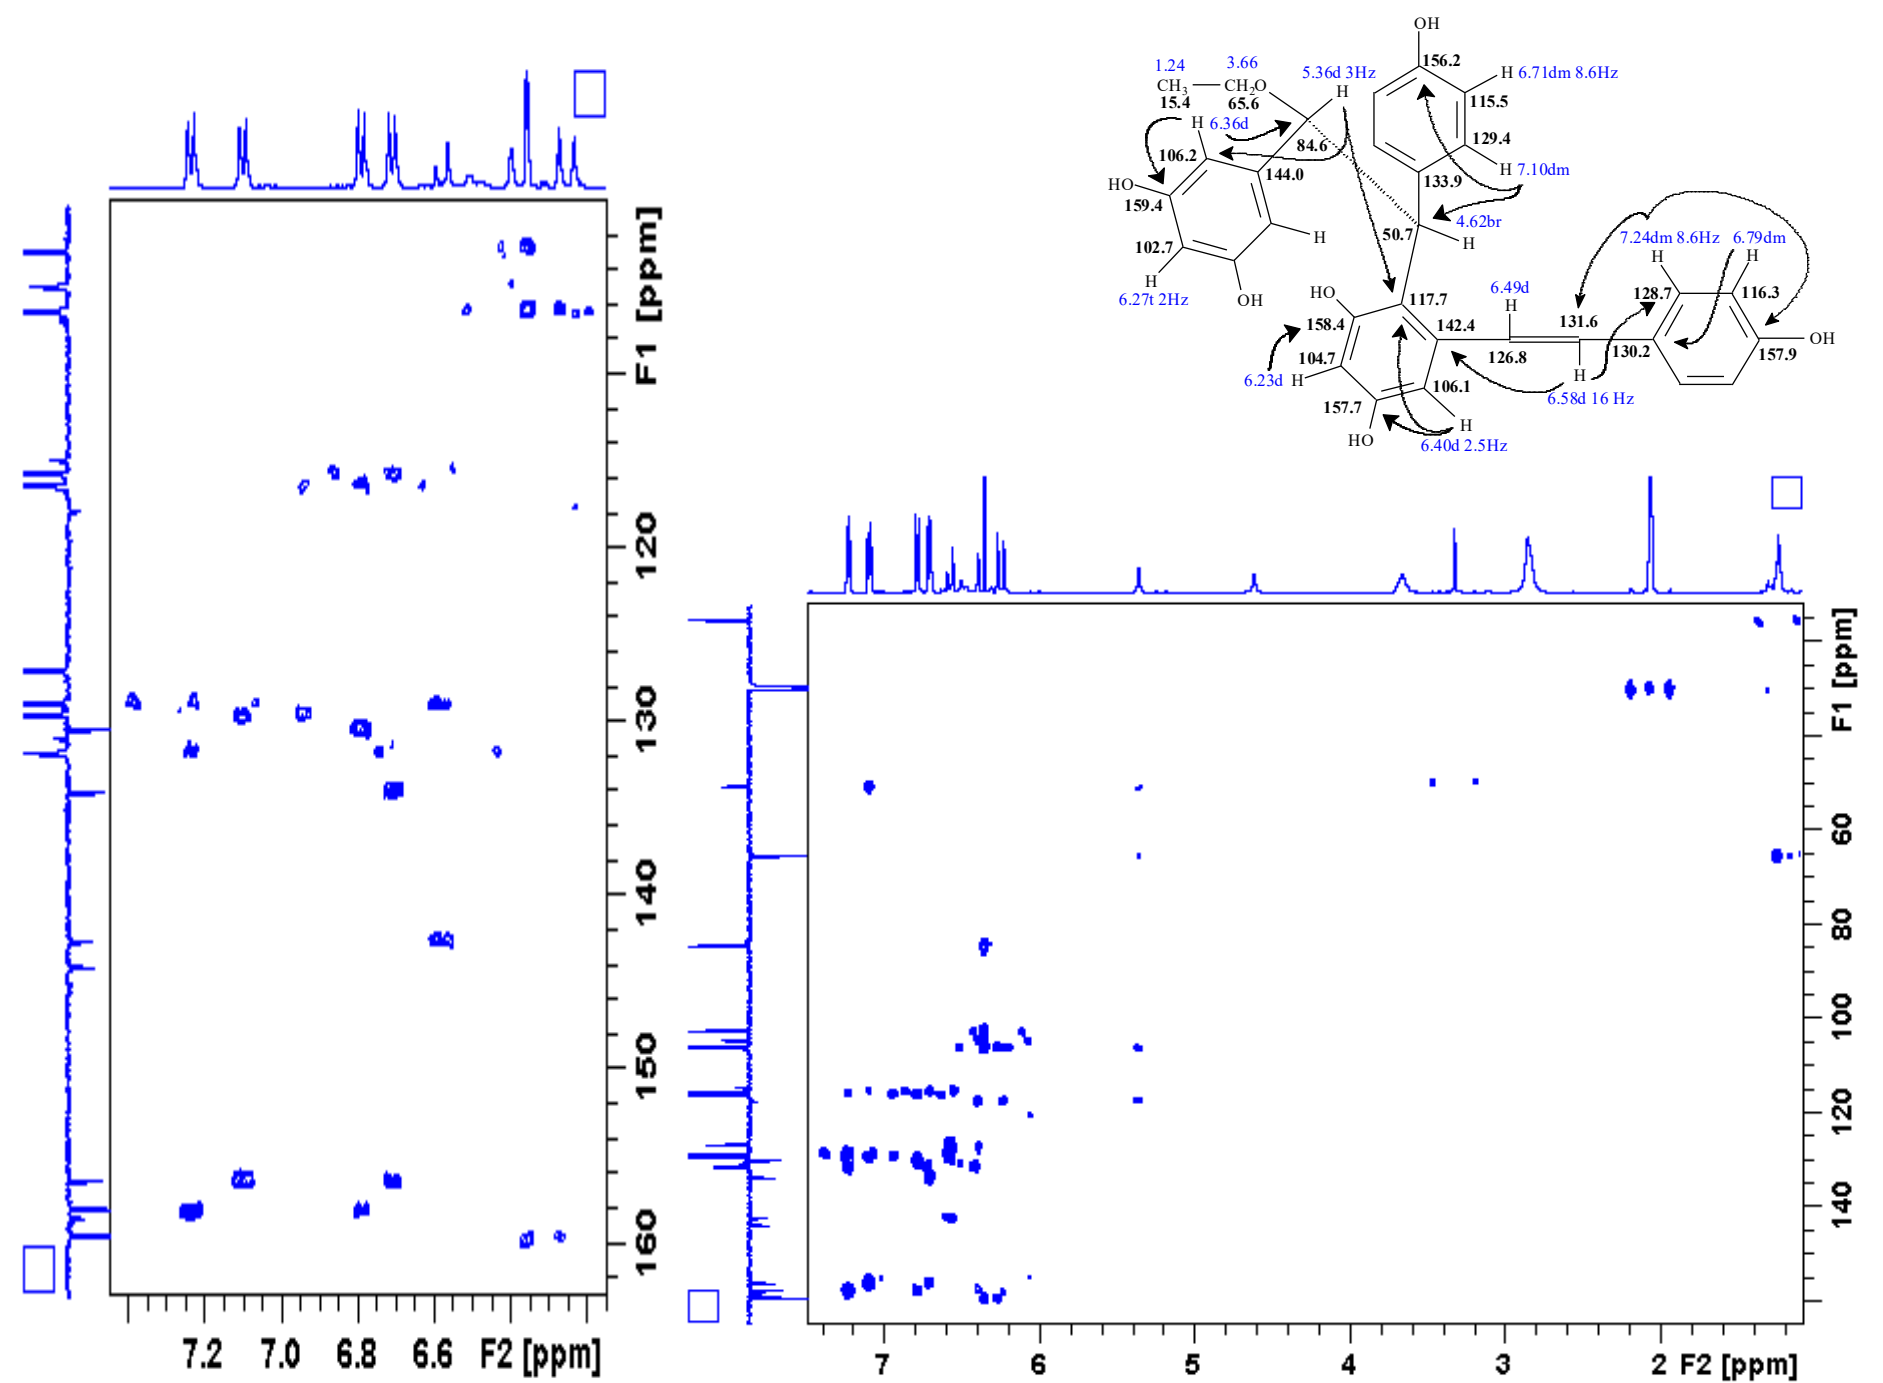

**Figure S47.** Compound **8**, COSY spectrum and COSY aromatic section.

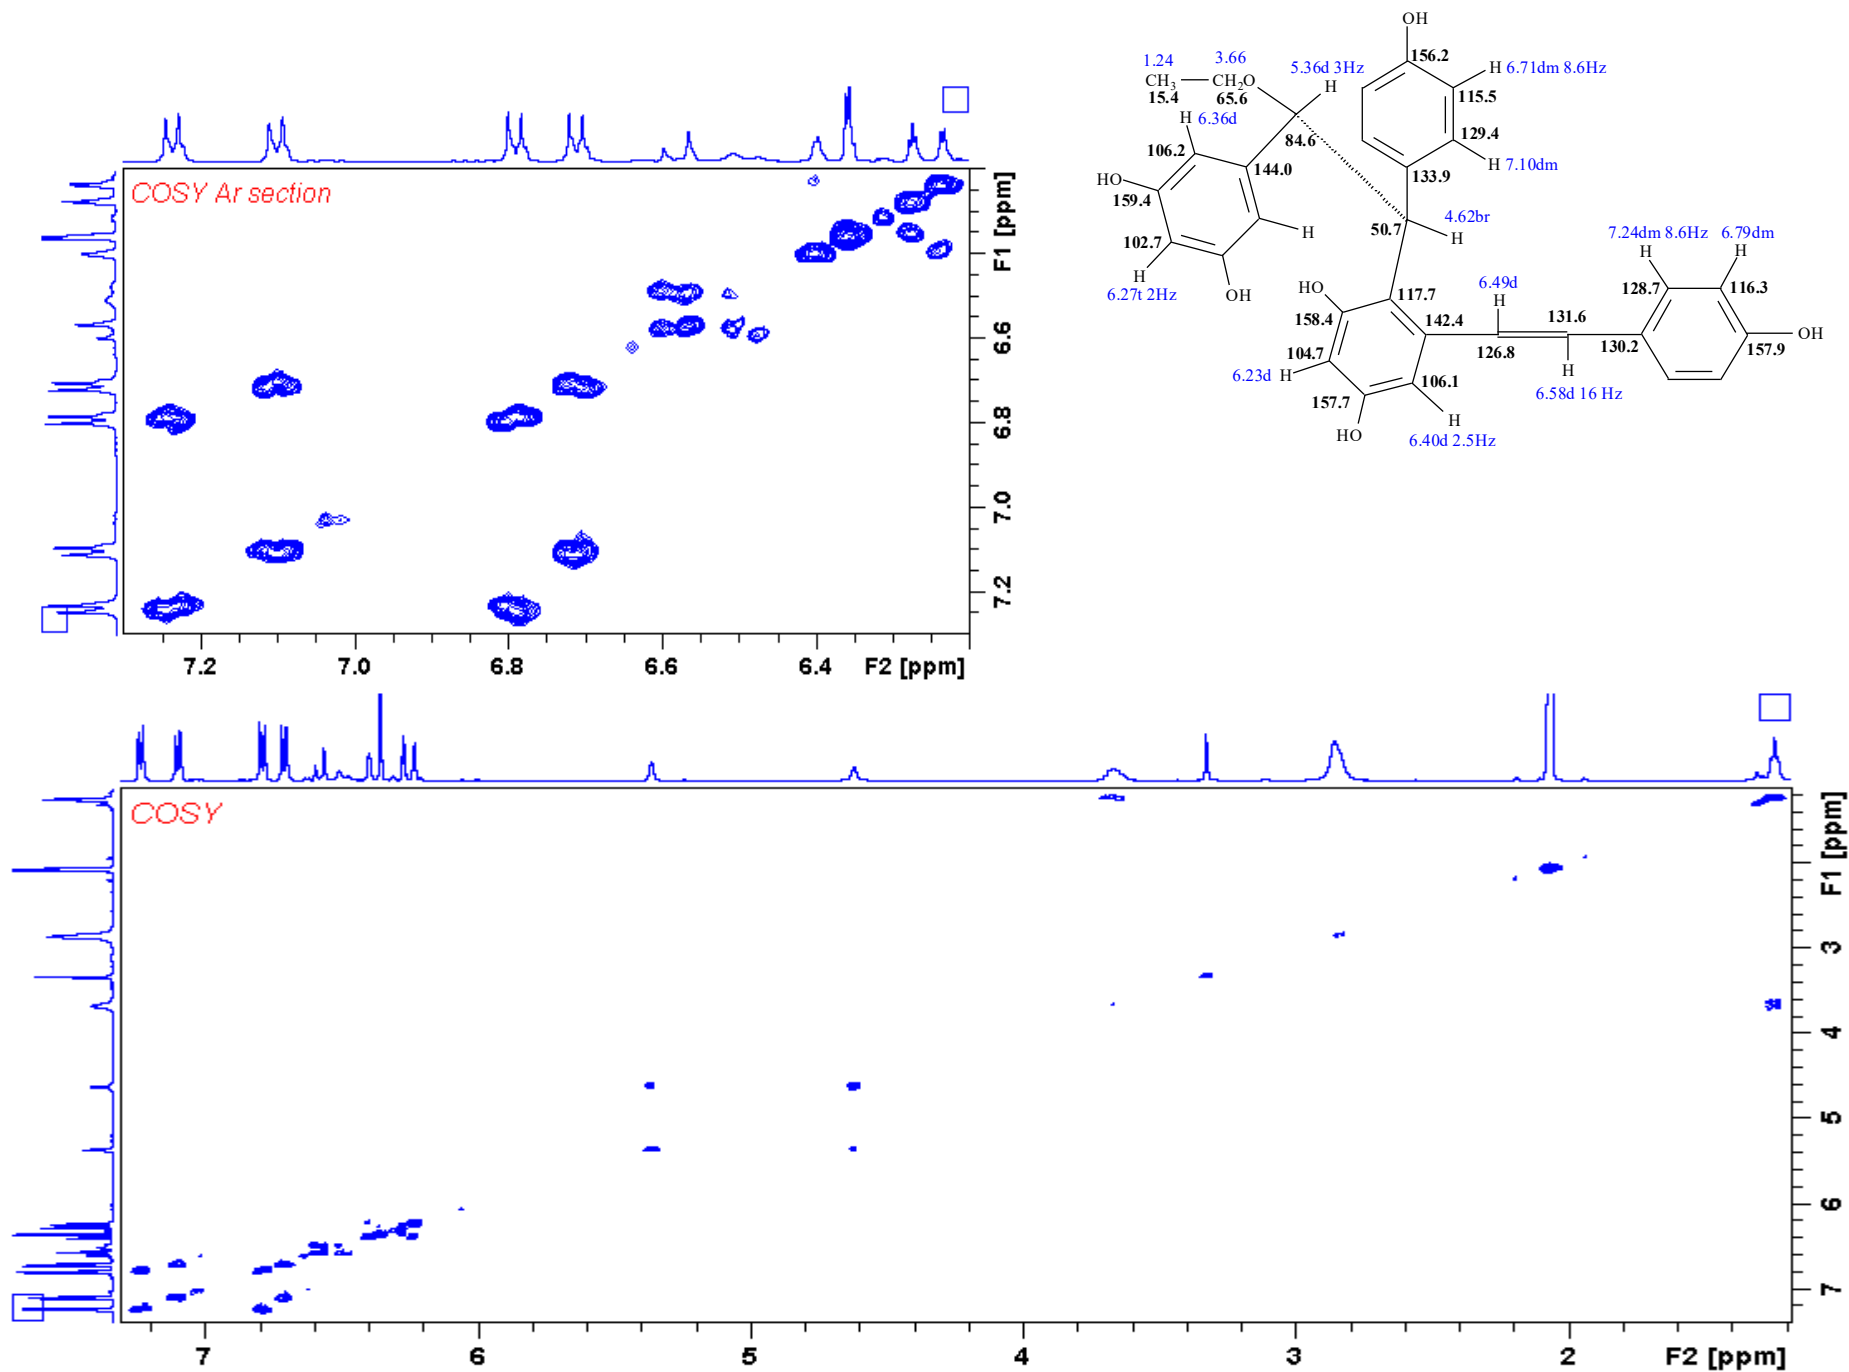

**Figure S48.** Compound **8**, NOESY; arrows indicate steric proximities, and assign configuration and the dominant conformer

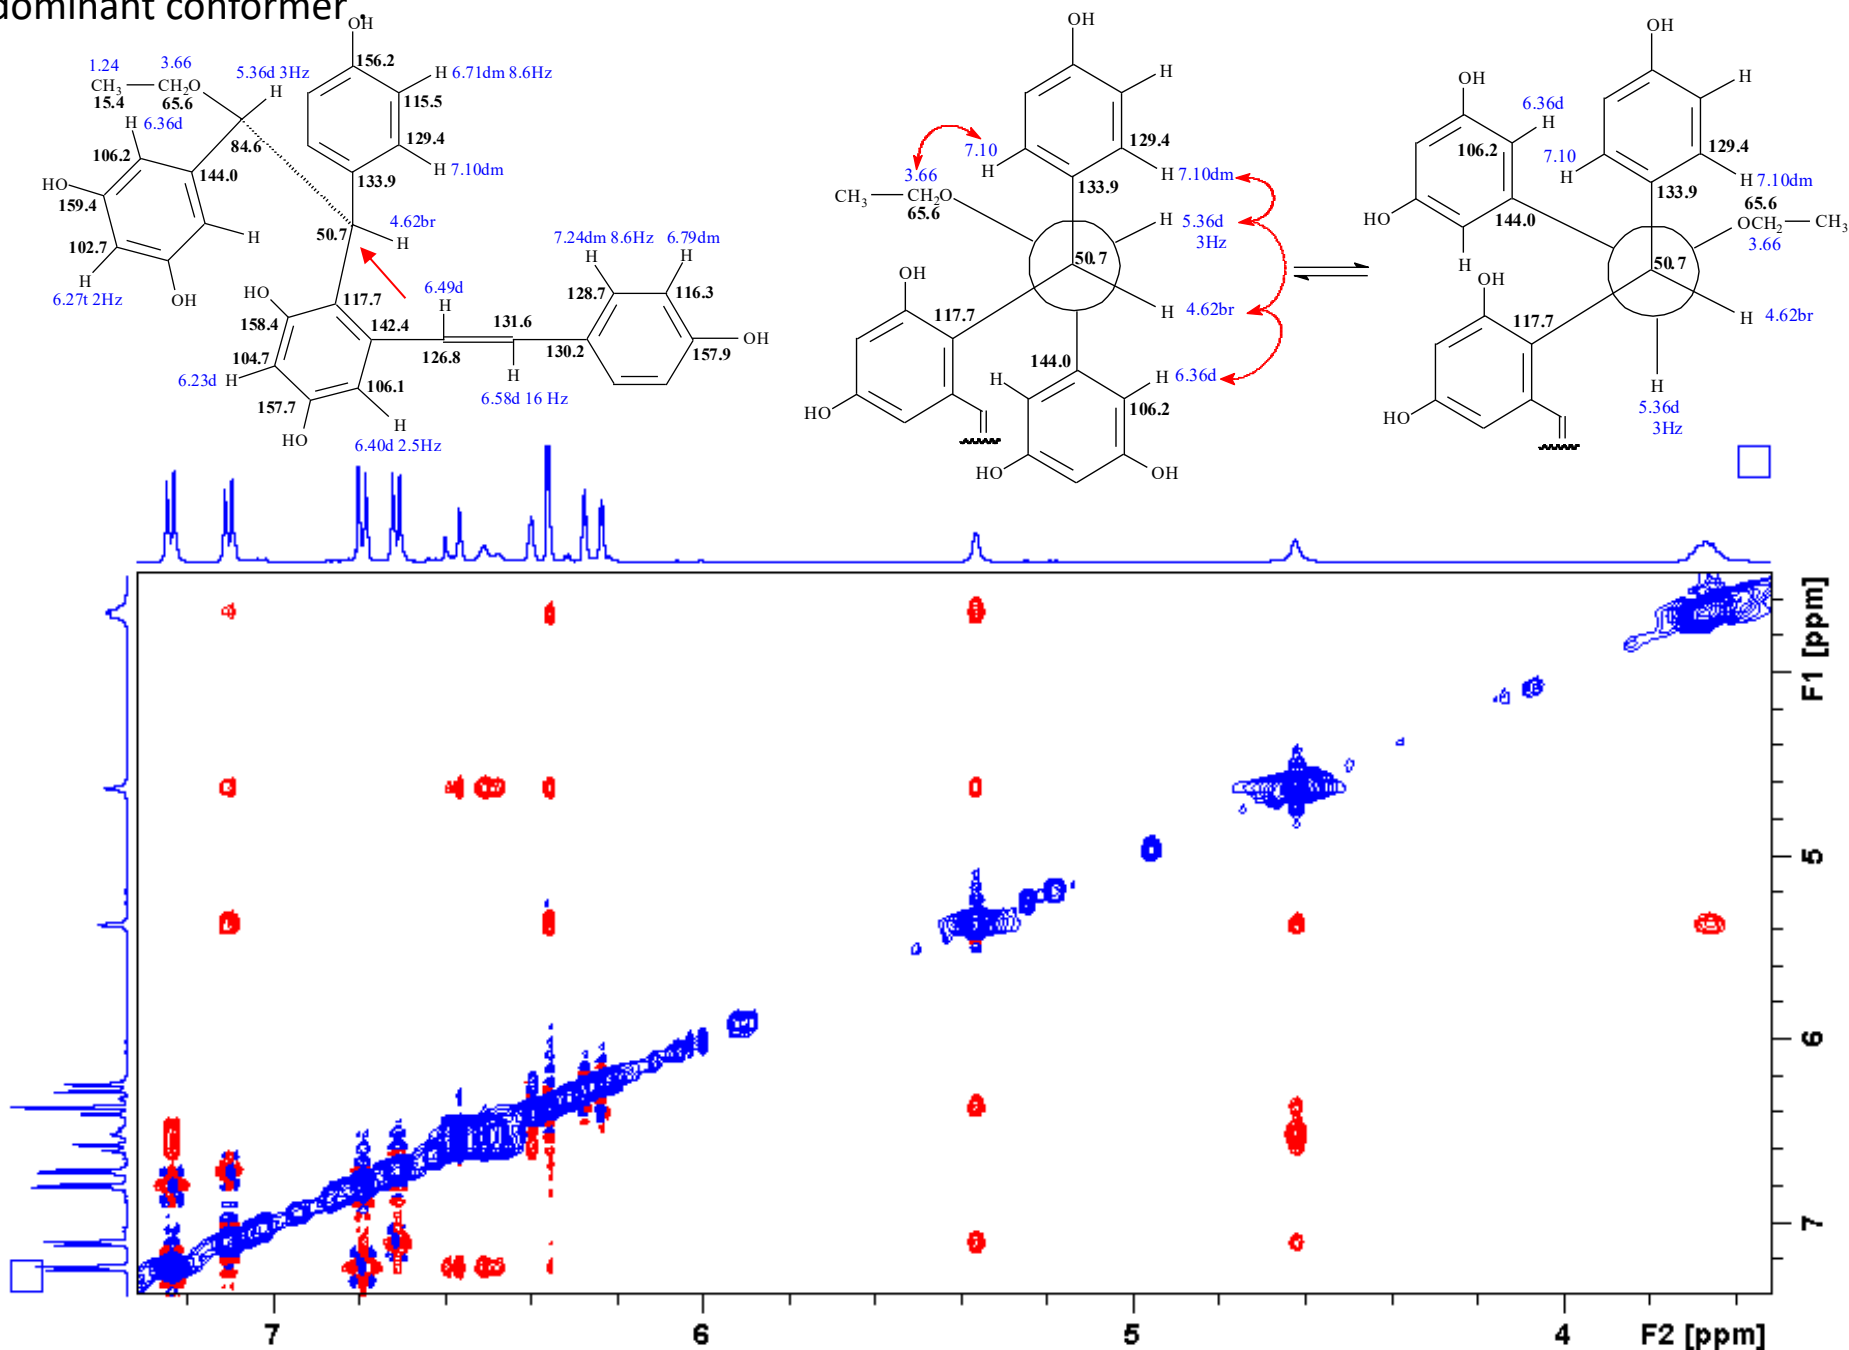

**Figure S49.** Compound **9**, <sup>1</sup>H NMR spectrum.

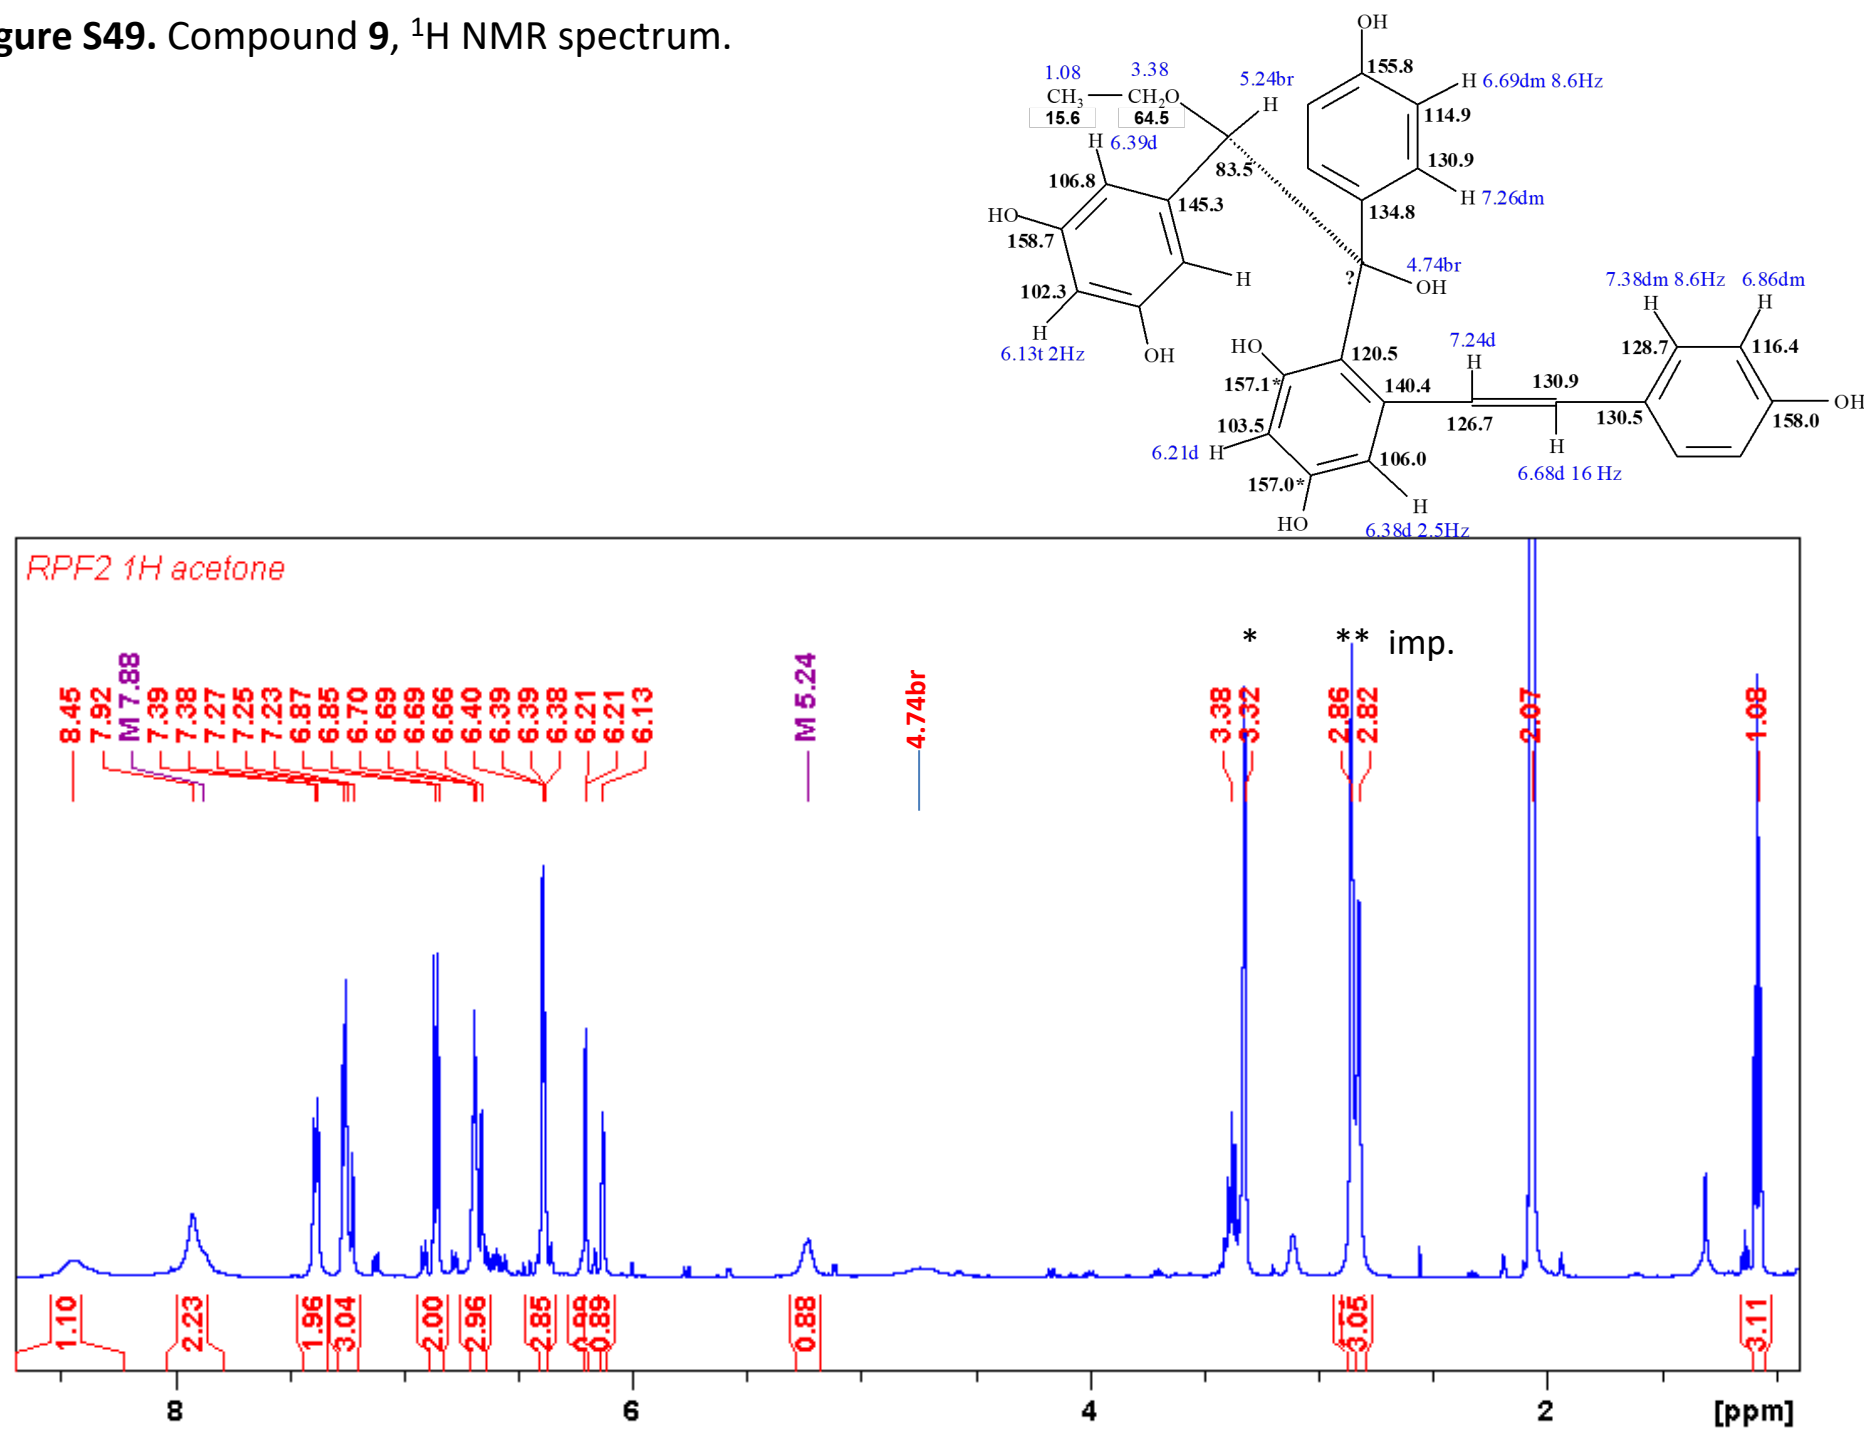

**Figure S50.** Compound **9**,  $^{13}\text{C}$ , APT NMR spectrum.

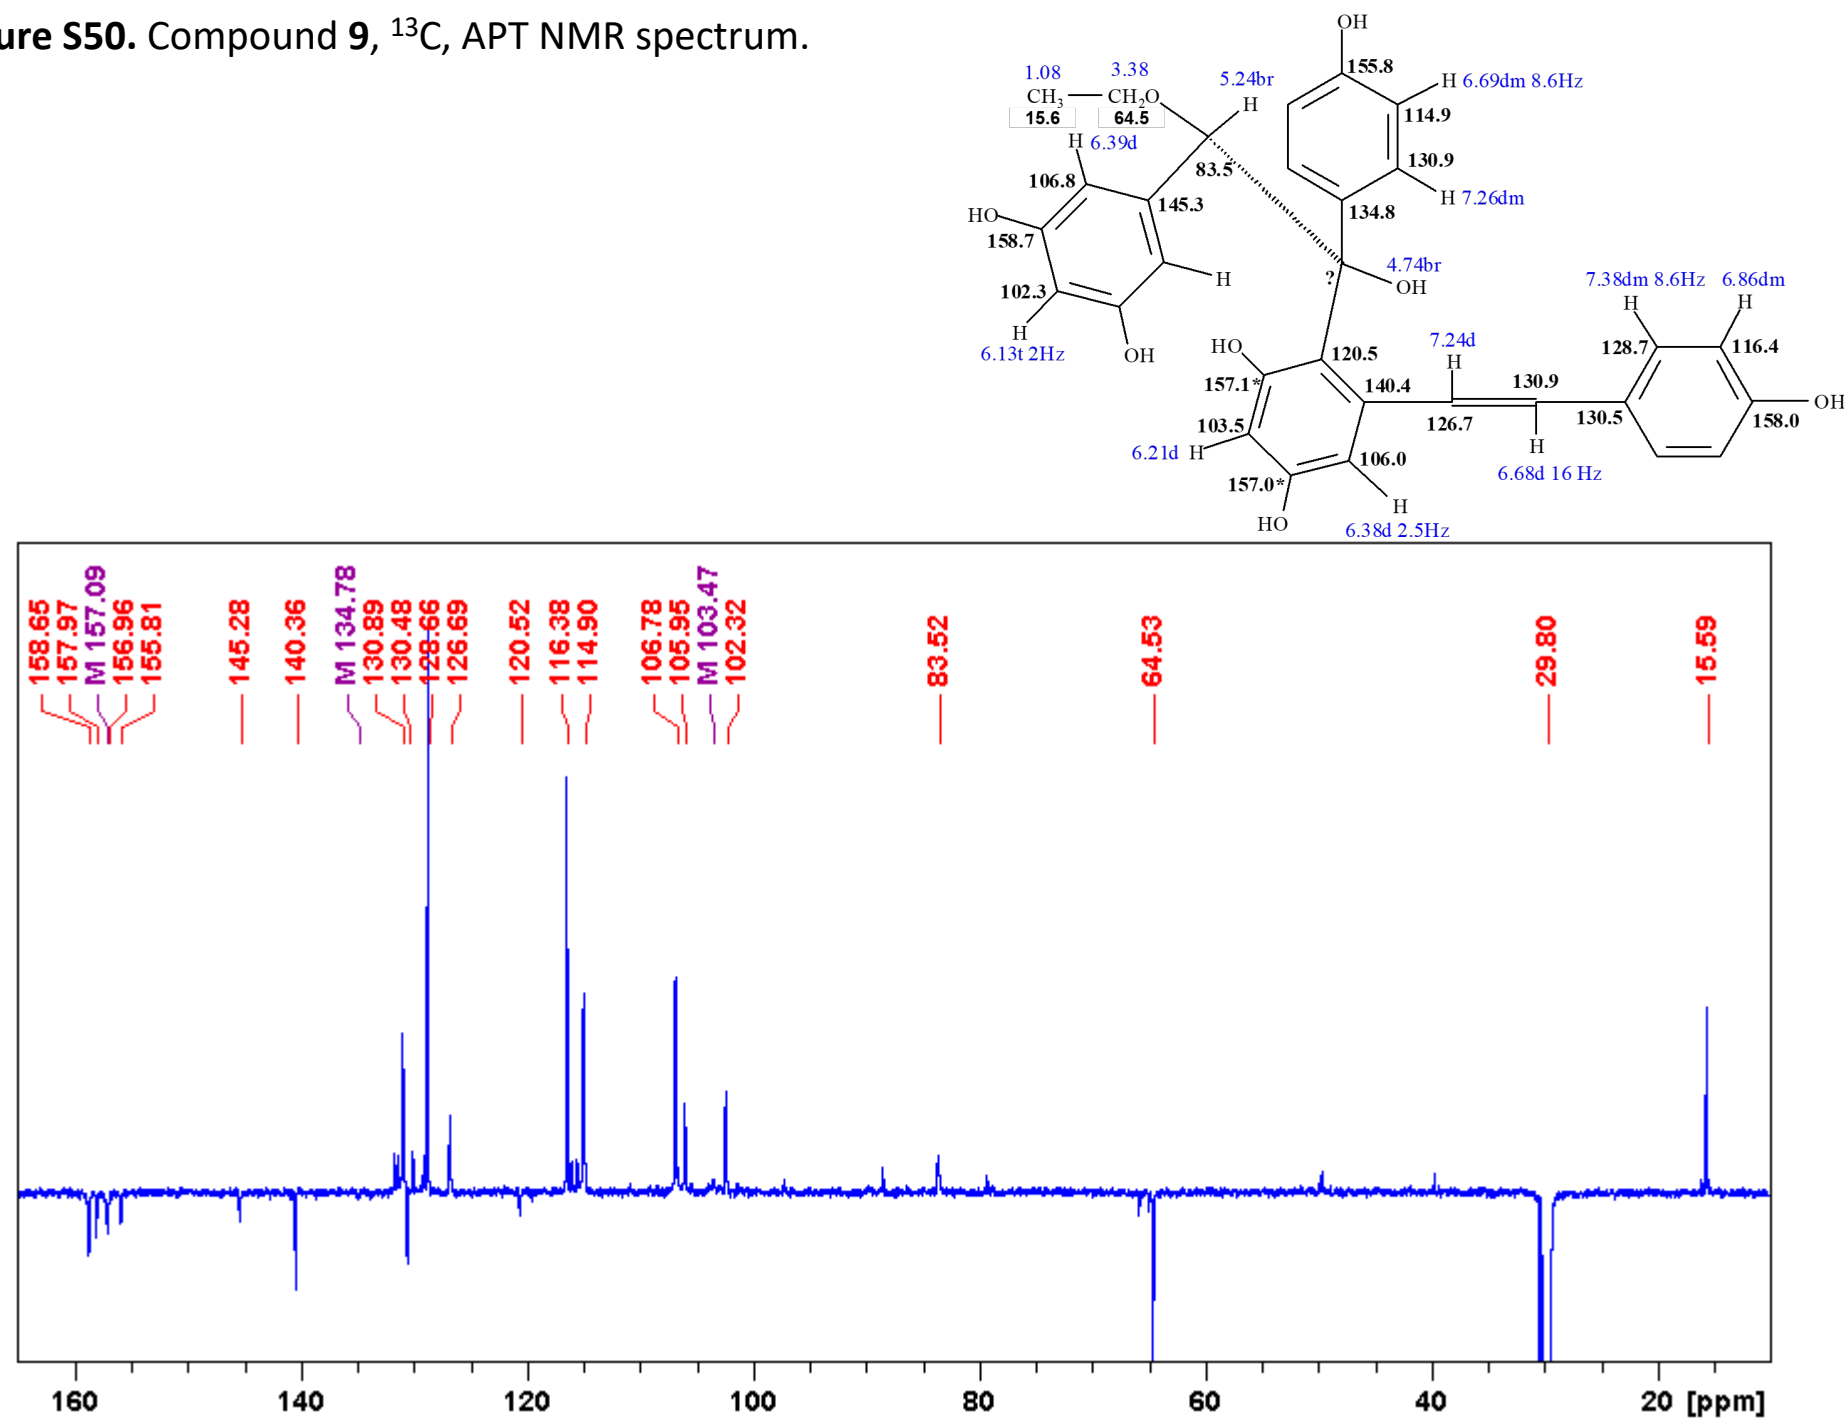

**Figure S51.** Compound **9**, HSQC spectrum and HSQC section.

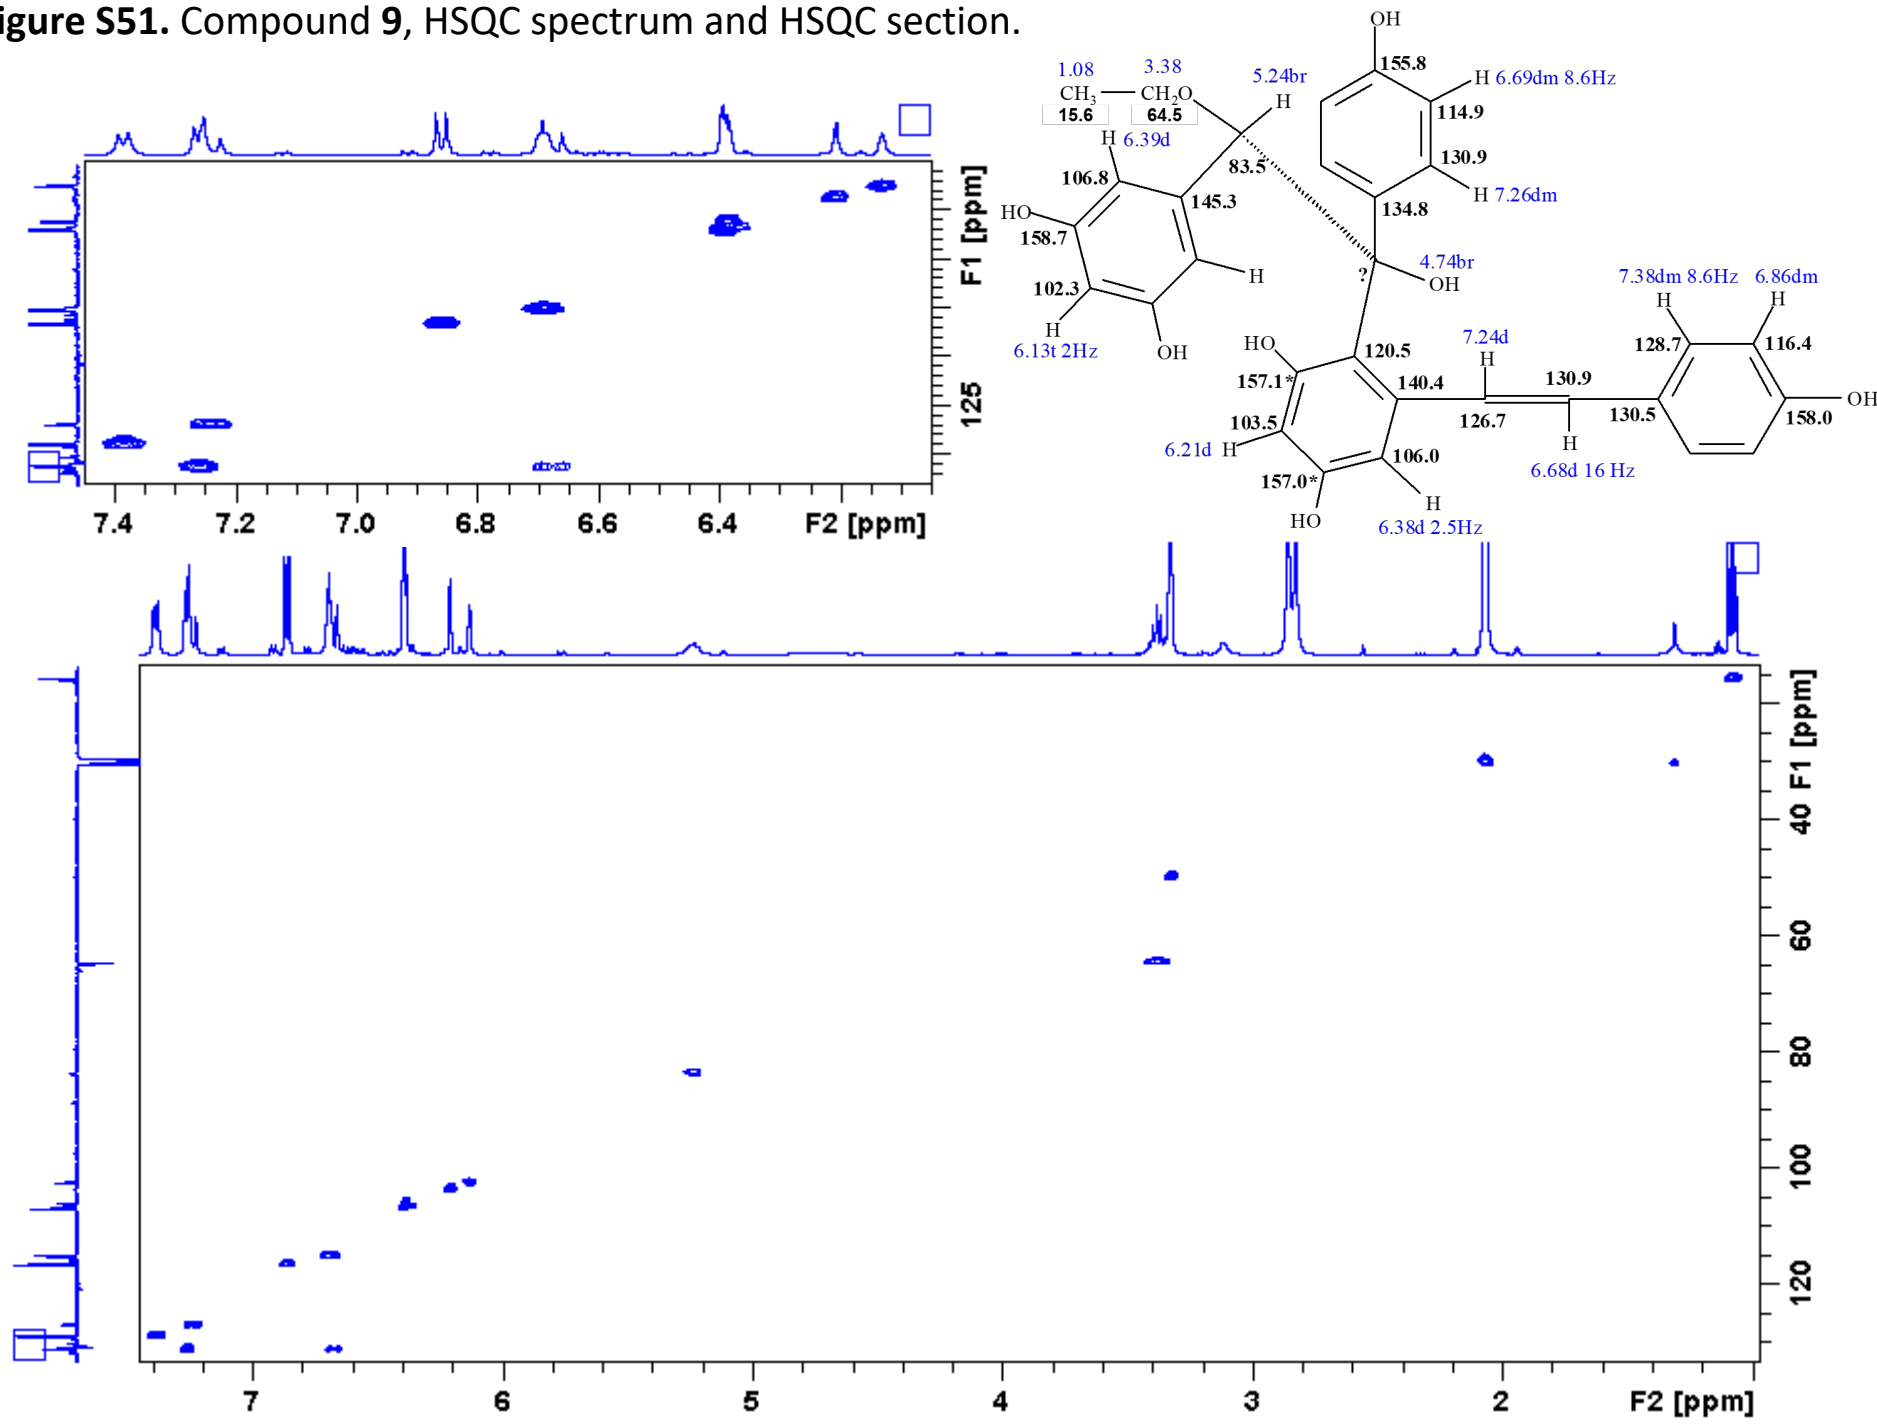

**Figure S52.** Compound **9**, HMBC spectrum.

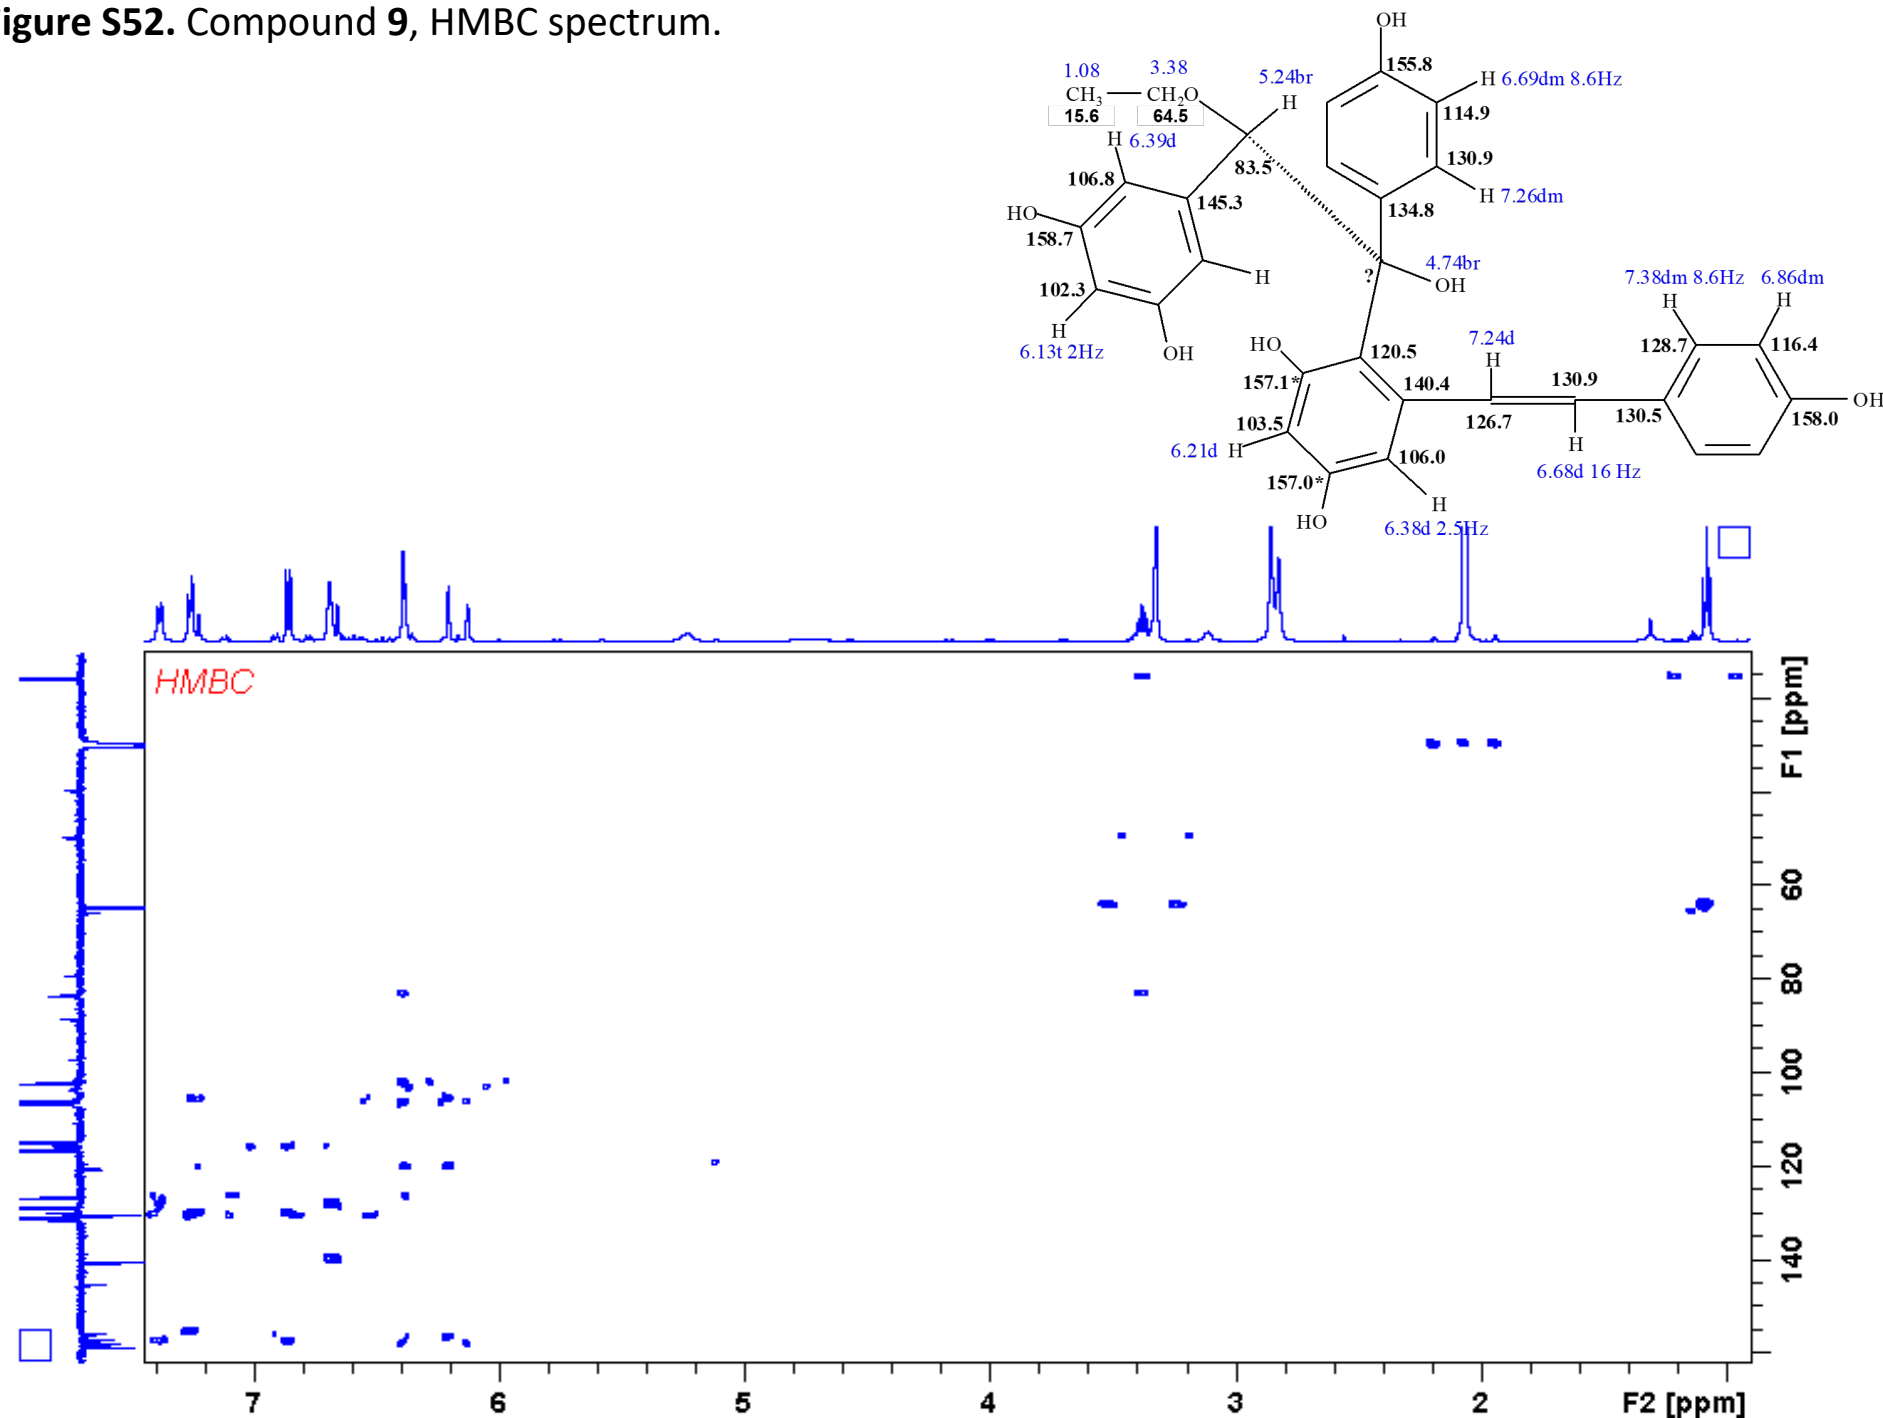

**Figure S53.** Compound **9**, NOESY spectrum.

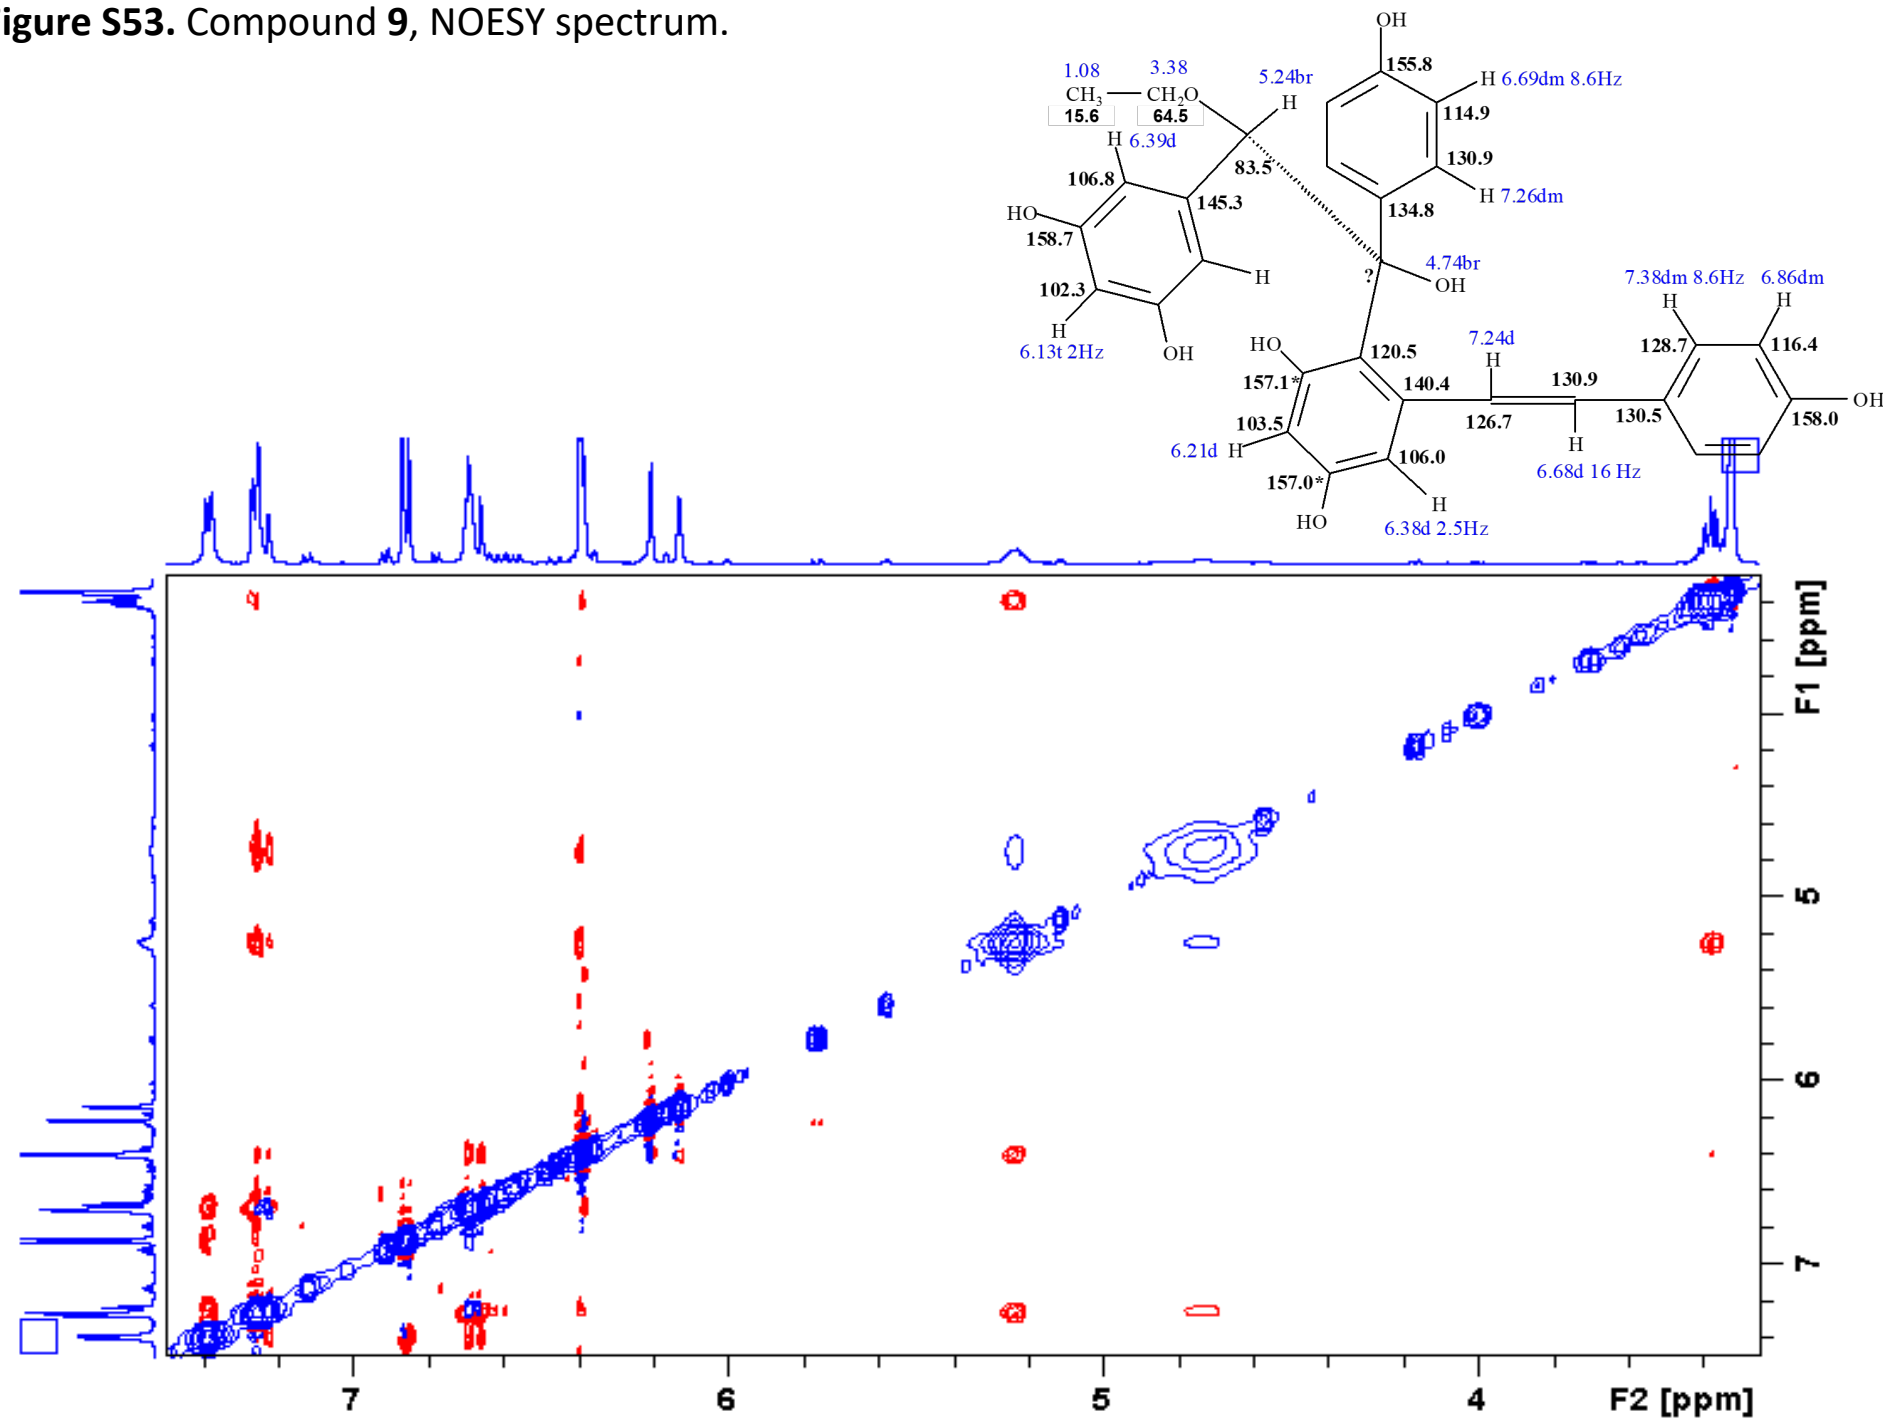



**Figure S54.** Compound **9**, HSQC spectrum and HSQC section, DMSO-d<sub>6</sub>, T=80°C.

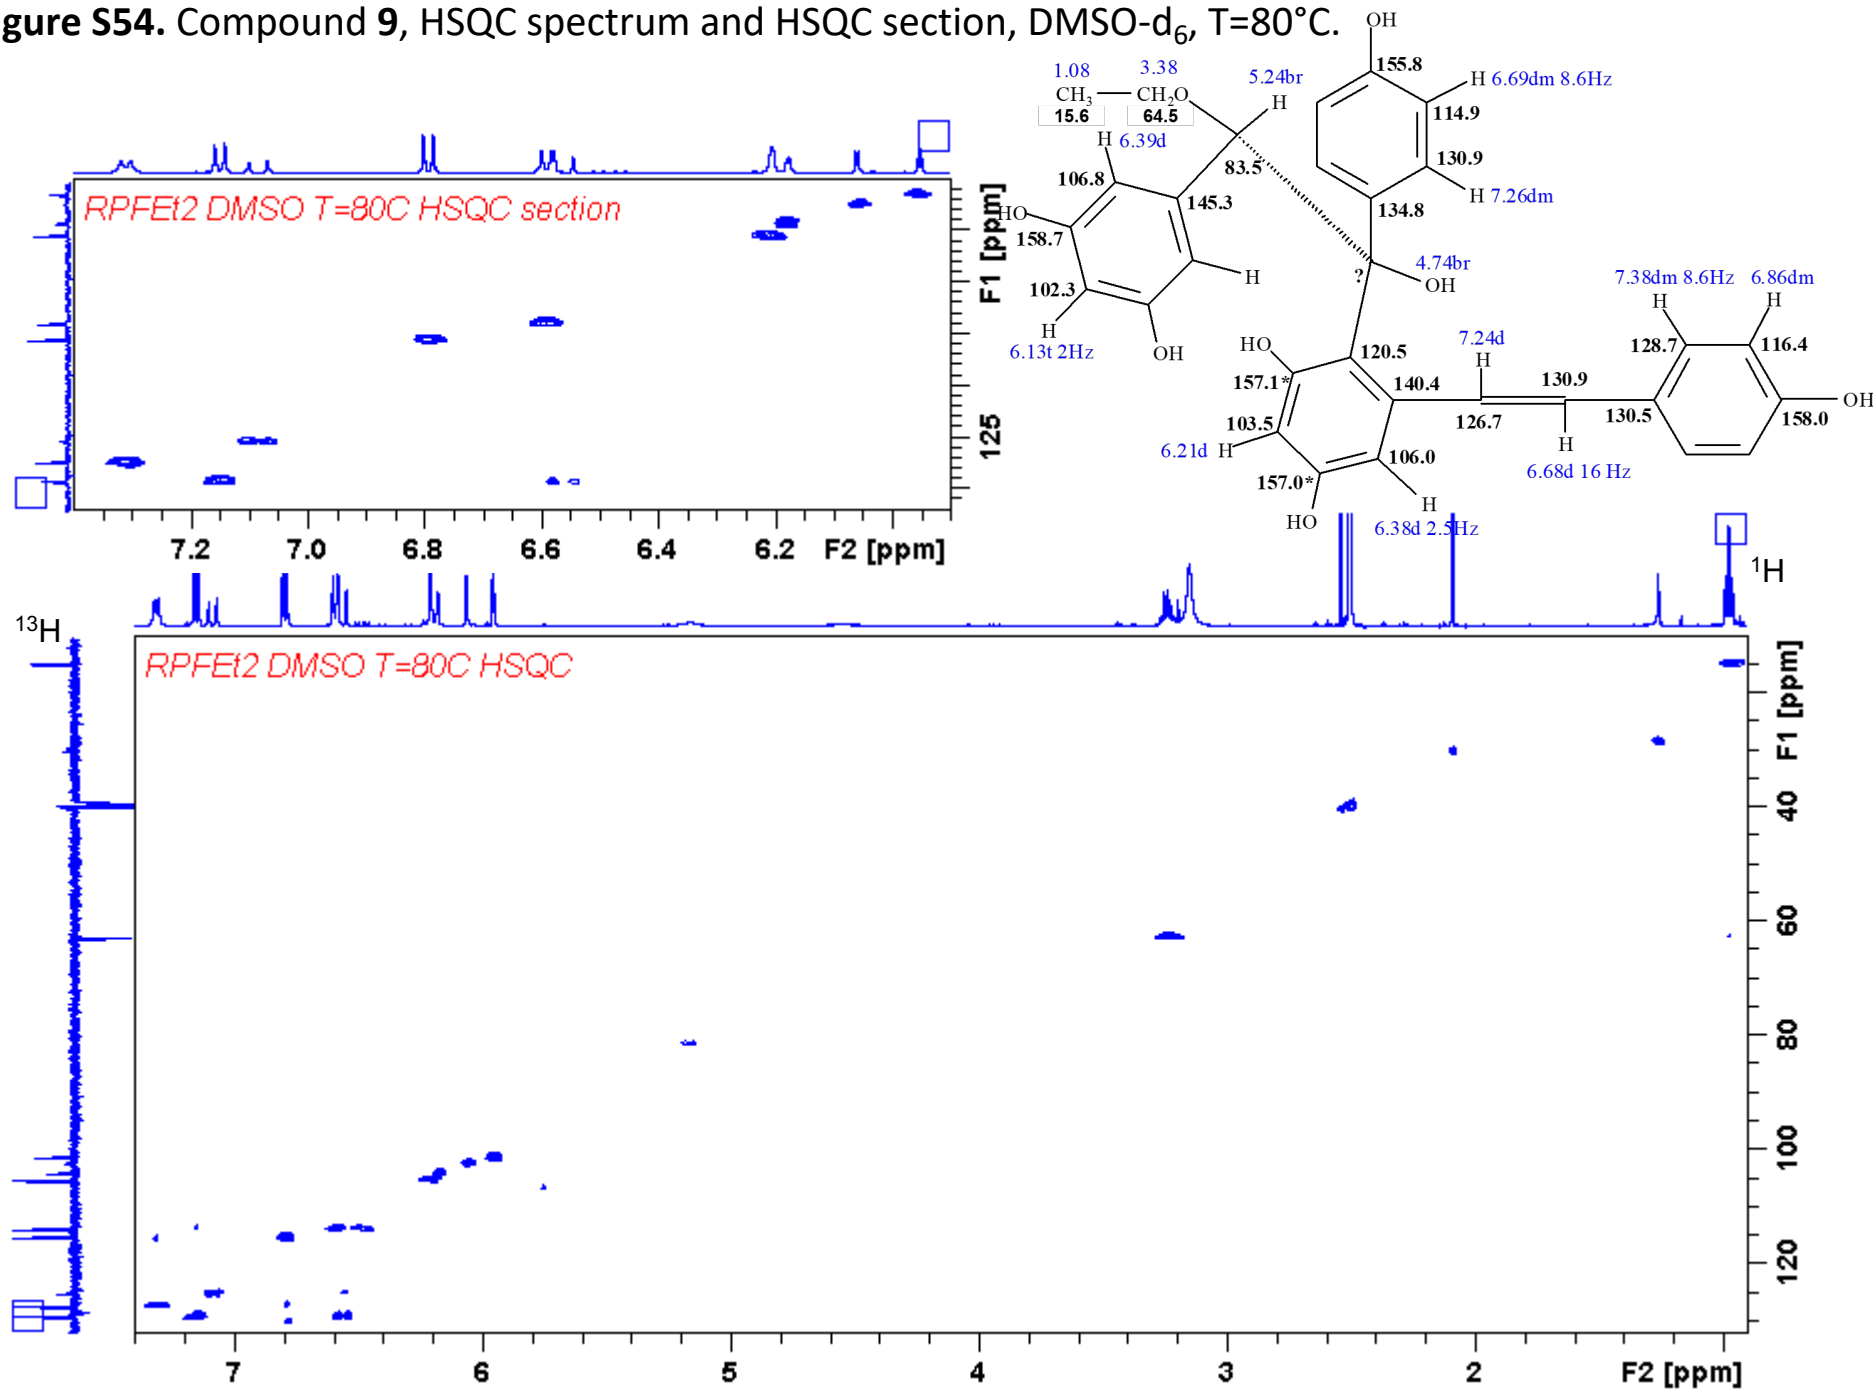

**Figure S55.** Compound **9**,  $^{13}\text{C}$ , APT NMR spectrum, DMSO- $\text{d}_6$ ,  $T=80^\circ\text{C}$ .

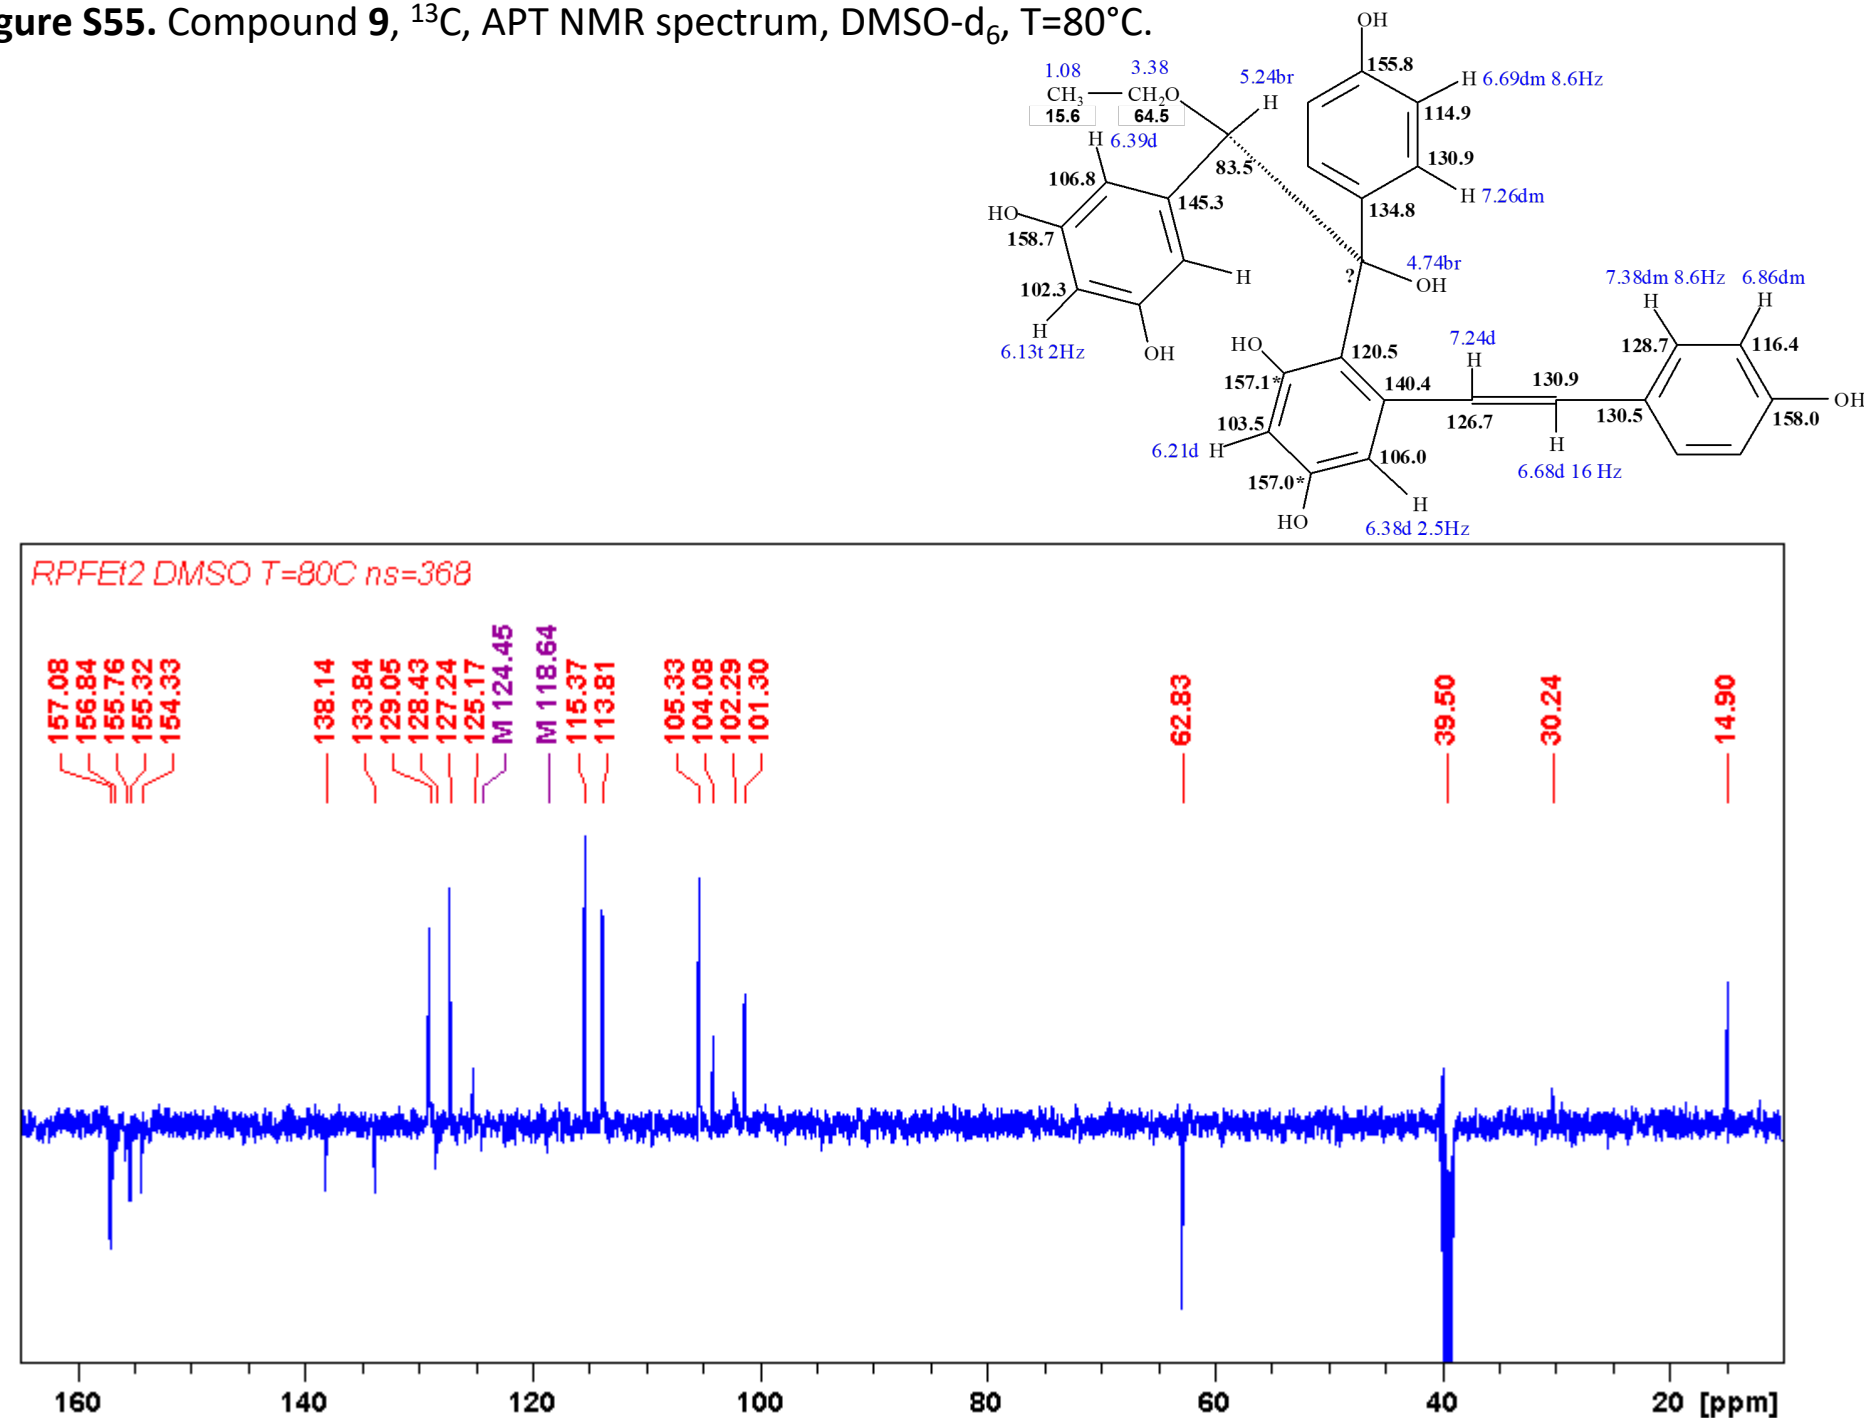

**Figure S56.** Compound **9**, selROE on CH (5.16 ppm) and OH (4.53 ppm) , DMSO-d<sub>6</sub>, T=80°C.

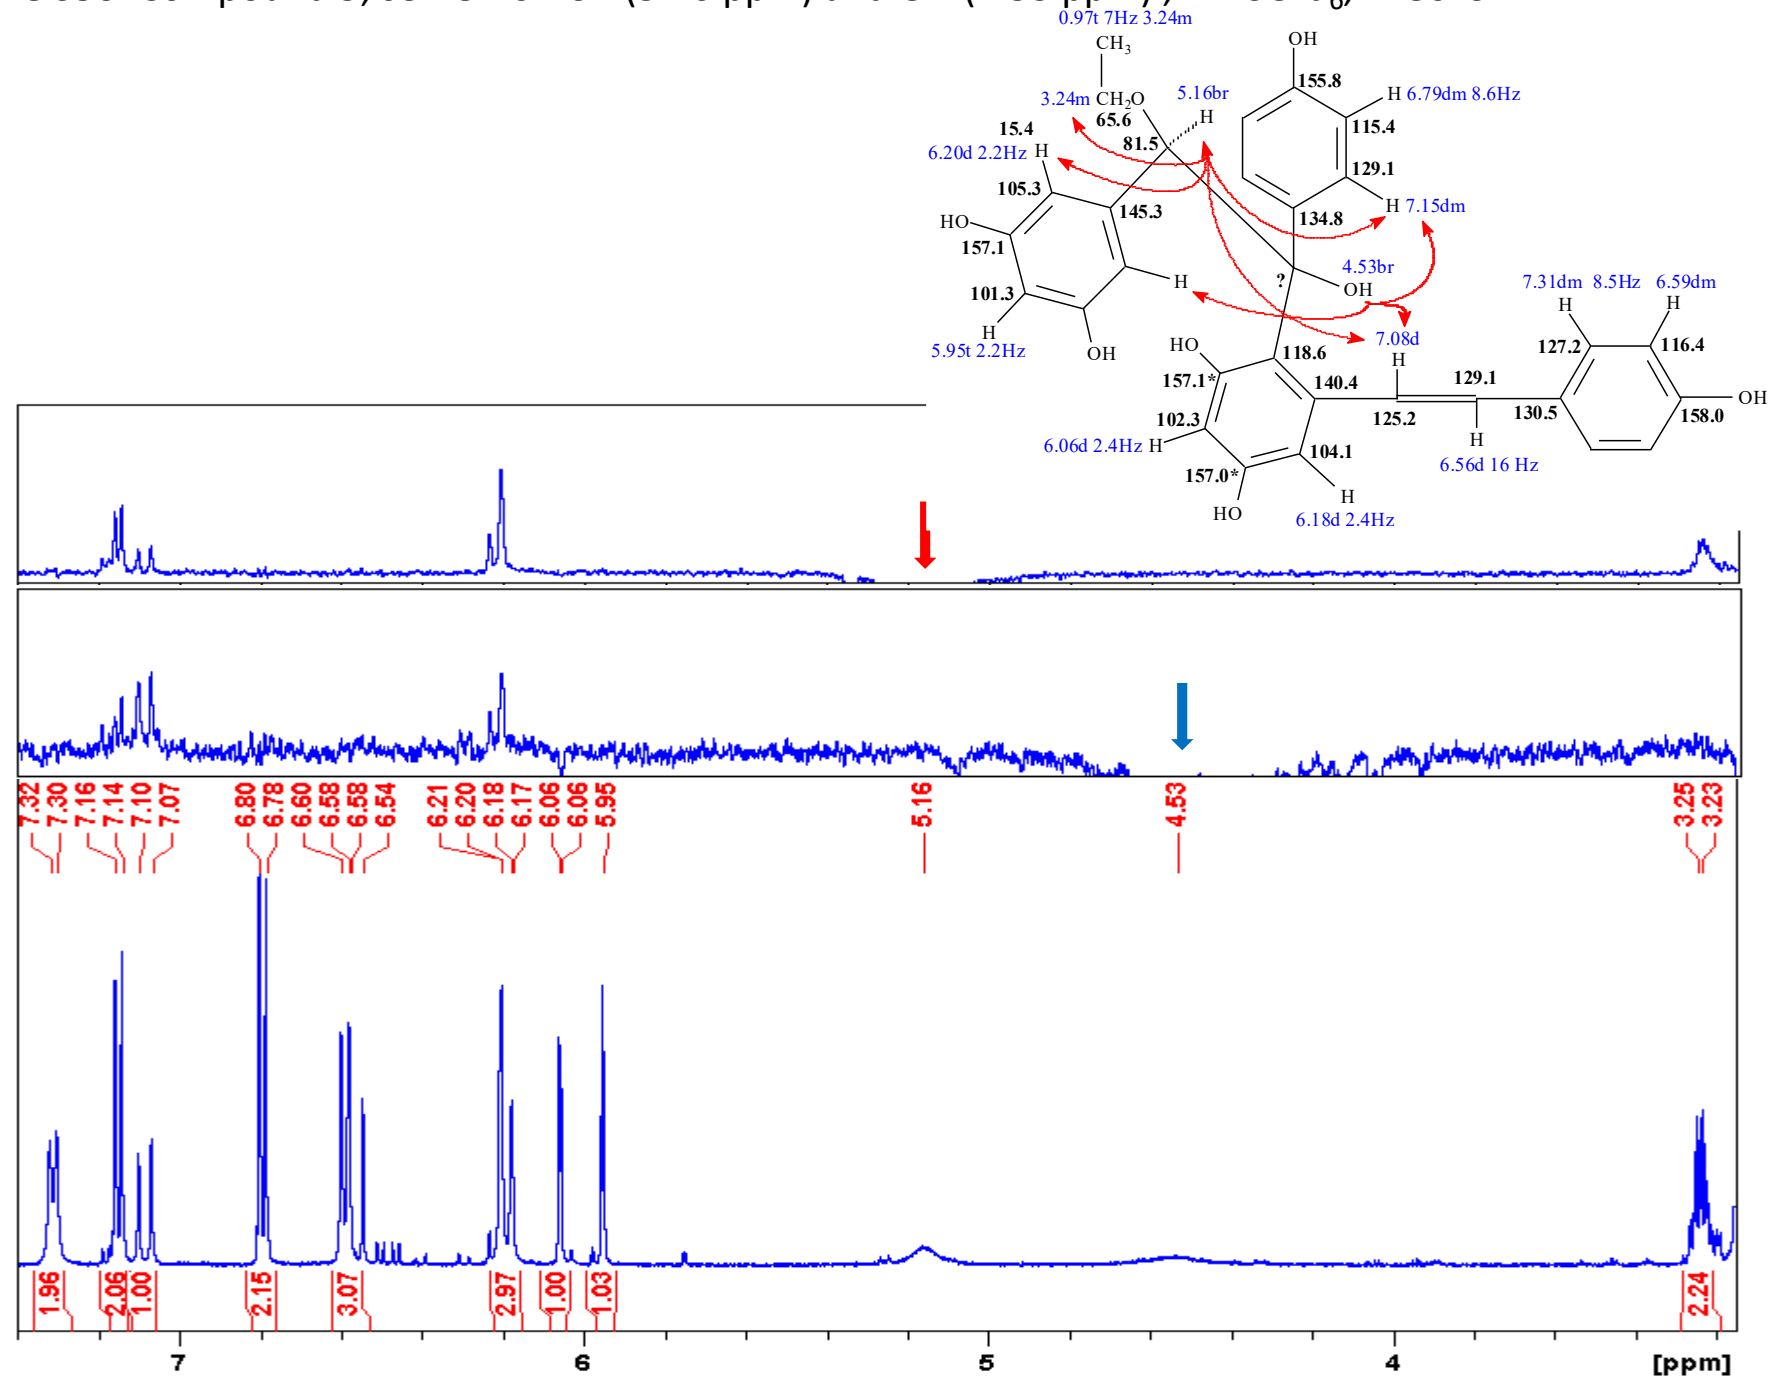

**Figure S57 : Lineweaver-Burk Plot of compound 2**

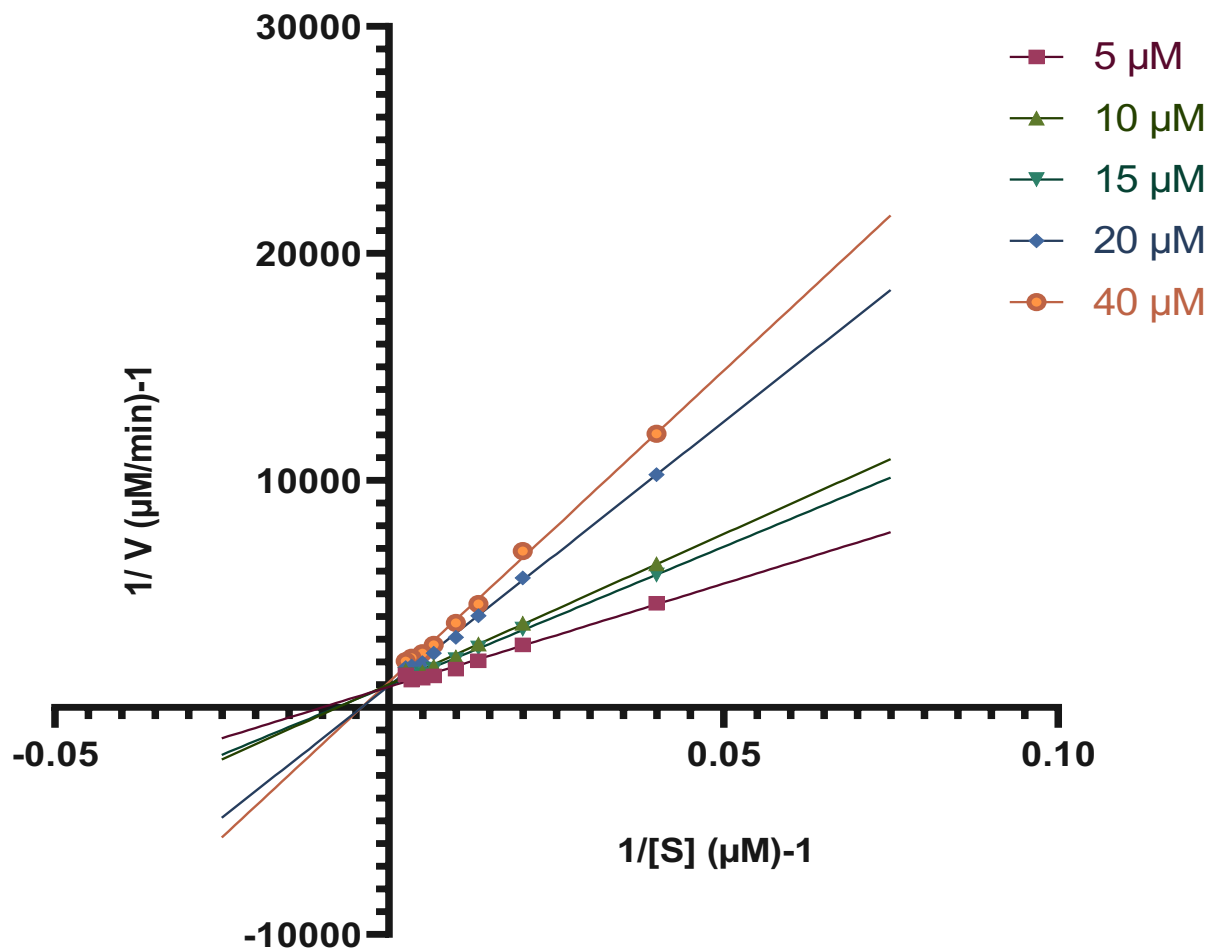

| Concentration ( $\mu\text{M}$ ) | $V_{\text{max}}$<br>( $\times 10^{-3}$ mM/min) | $K_m$<br>( $\mu\text{M}$ ) | Inhibition type        |
|---------------------------------|------------------------------------------------|----------------------------|------------------------|
| 5                               | 1.1                                            | 99.5                       | Competitive inhibition |
| 10                              | 0.98                                           | 129.7                      |                        |
| 15                              | 1.04                                           | 126.5                      |                        |
| 20                              | 1.05                                           | 244.0                      |                        |
| 40                              | 0.89                                           | 244.0                      |                        |

Figure S58 : Lineweaver-Burk Plot of compound 3

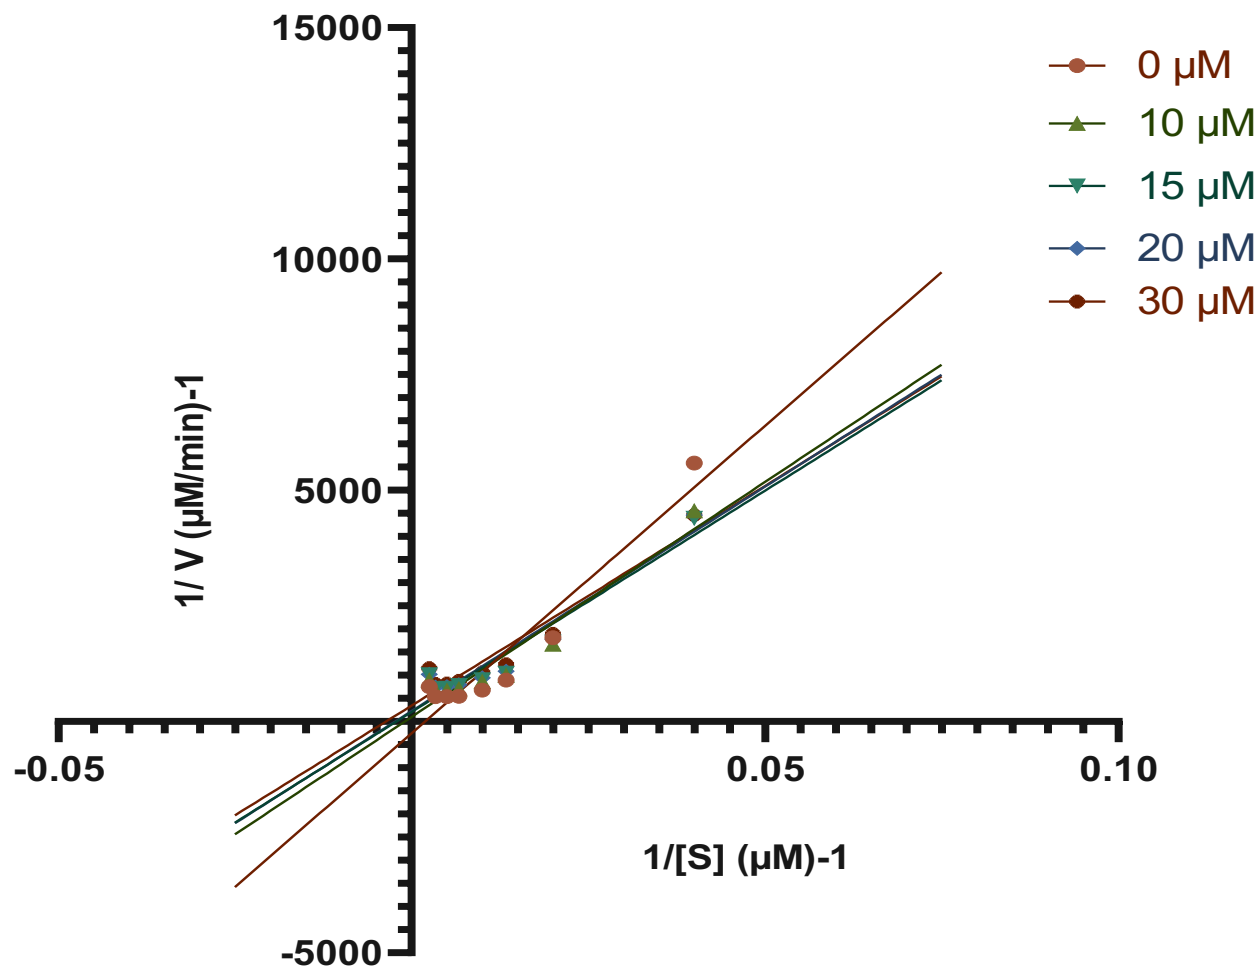

| Concentration ( $\mu\text{M}$ ) | Vmax<br>( $\times 10^{-3}$ mM/min) | Km<br>( $\mu\text{M}$ ) | Inhibition type  |
|---------------------------------|------------------------------------|-------------------------|------------------|
| 0                               | -3.9                               | -521.8                  | Mixed inhibition |
| 10                              | 10.1                               | 1030.7                  |                  |
| 15                              | 4.8                                | 463.1                   |                  |
| 20                              | 4.4                                | 427.4                   |                  |
| 30                              | 2.9                                | 275.4                   |                  |

**Figure S59 : Lineweaver-Burk Plot of compound 4**

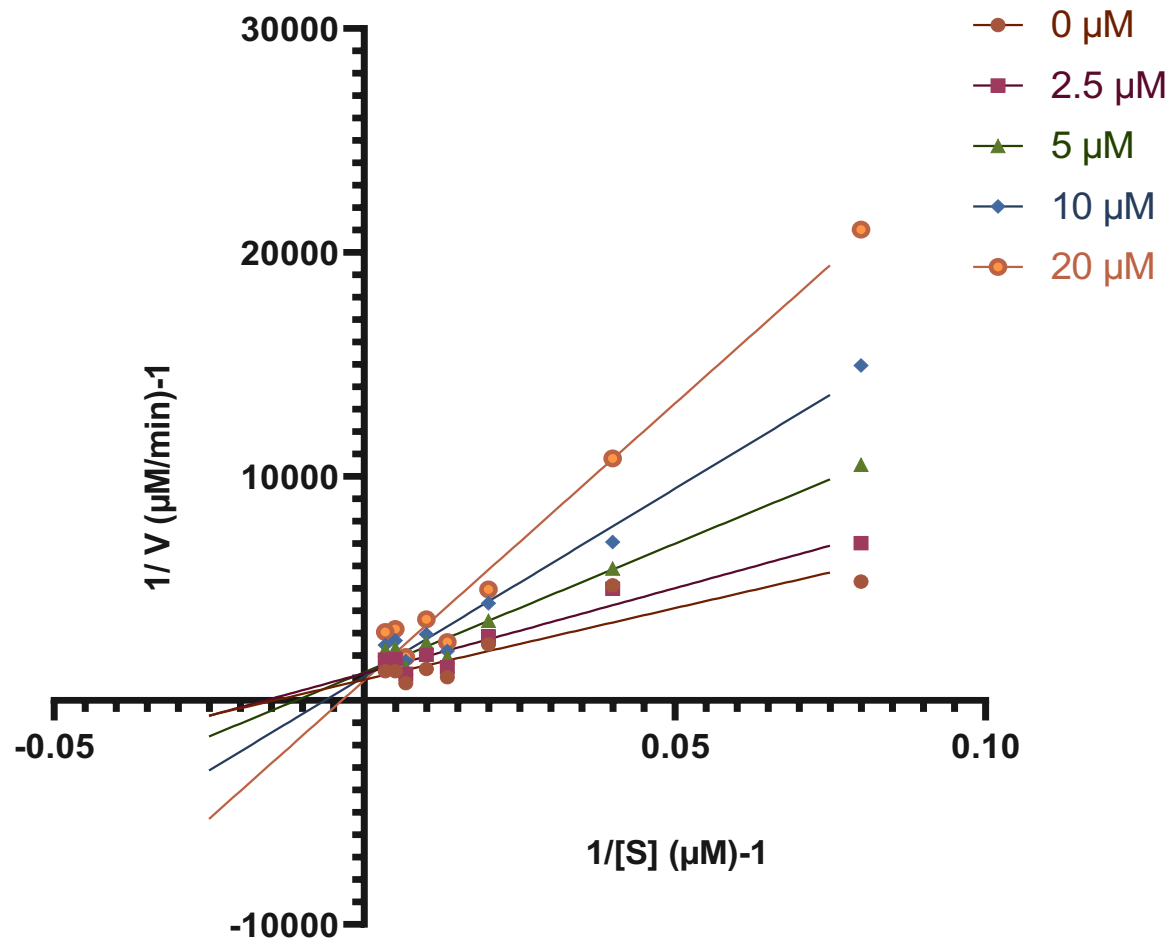

| Concentration ( $\mu\text{M}$ ) | Vmax<br>( $\times 10^{-3}$ mM/min) | Km<br>( $\mu\text{M}$ ) | Inhibition type           |
|---------------------------------|------------------------------------|-------------------------|---------------------------|
| 0                               | 1.1                                | 68.7                    | Competitive<br>inhibition |
| 2.5                             | 0.8                                | 62.5                    |                           |
| 5                               | 0.8                                | 91.0                    |                           |
| 10                              | 0.9                                | 157.1                   |                           |
| 20                              | 1.1                                | 276.9                   |                           |

**Figure S60 : Lineweaver-Burk Plot of compound 5**

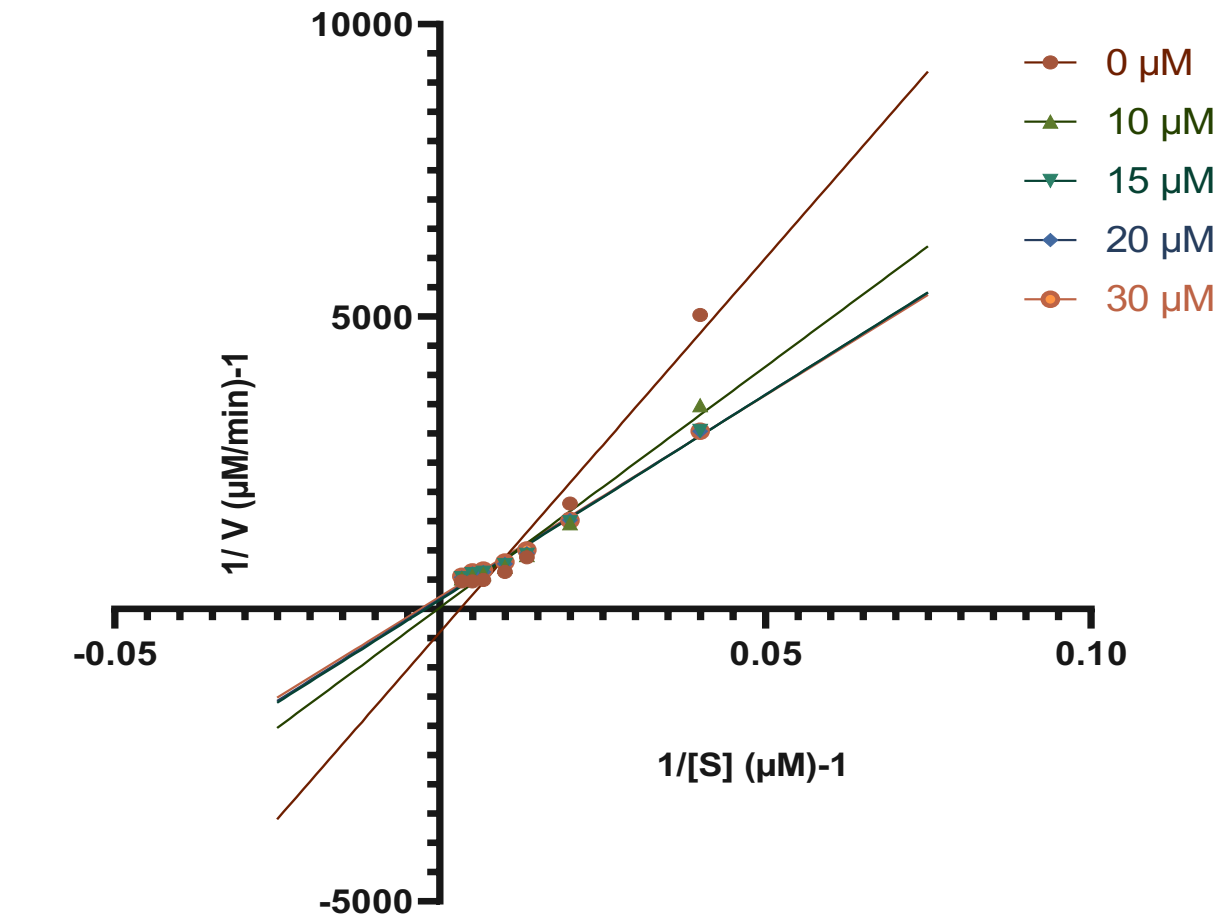

| Concentration ( $\mu\text{M}$ ) | $V_{\text{max}}$<br>( $\times 10^{-3}$ mM/min) | $K_m$<br>( $\mu\text{M}$ ) | Inhibition type  |
|---------------------------------|------------------------------------------------|----------------------------|------------------|
| 0                               | -2.5                                           | -320.5                     | Mixed inhibition |
| 10                              | 40.6                                           | 3342.3                     |                  |
| 15                              | 6.6                                            | 460.8                      |                  |
| 20                              | 5.8                                            | 406.2                      |                  |
| 30                              | 4.8                                            | 333.3                      |                  |

**Figure S61 : Lineweaver-Burk Plot of compound 6**

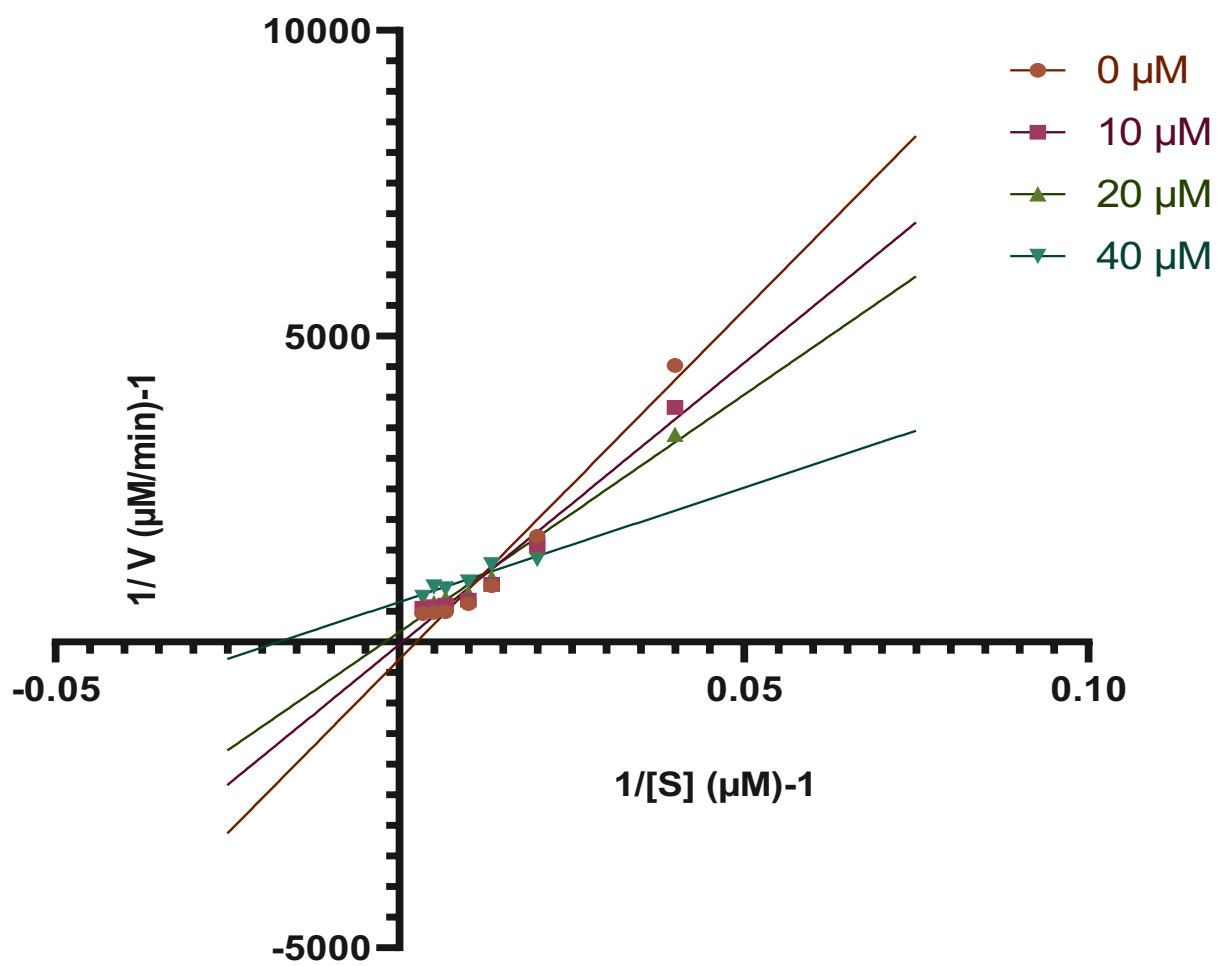

| Concentration ( $\mu\text{M}$ ) | Vmax<br>( $\times 10^{-3}$ mM/min) | Km<br>( $\mu\text{M}$ ) | Inhibition type  |
|---------------------------------|------------------------------------|-------------------------|------------------|
| 0                               | -3.6                               | -407.4                  | Mixed inhibition |
| 10                              | -25.8                              | -2373.9                 |                  |
| 20                              | 6.1                                | 471.1                   |                  |
| 40                              | 1.5                                | 57.0                    |                  |
